# Supplementary material for: An Integrative Analysis of Transcriptomics and Proteomics Reveals Novel Insights into the Response in the Midgut of Spodoptera frugiperda Larvae to Vip3Aa
Source: MDPI journal article supplement (doi:10.3390/toxins14010055), 2022-01-13
Supplement: s1 [file s1]

# An Integrative Analysis of Transcriptomic and Proteomic Reveals Novel Insights Into the Response in the Midgut of *Spodoptera frugiperda* Larvae to Vip3Aa

Minghui Jin, Yinxue Shan, Yan Peng, Ping Wang, Qi Li, Songmiao Yu, Lei Zhang and Yutao Xiao

Profiles ordered based on the pvalue significance of number of Geness assigned versus expected

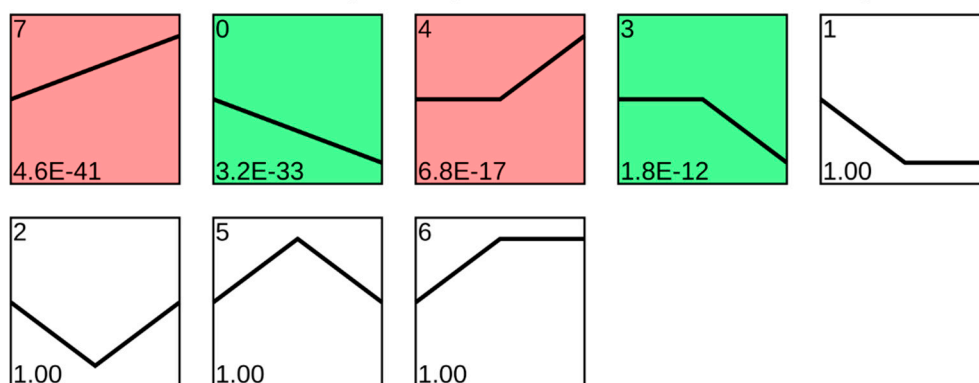

**Figure S1.** The clustered profiles analyzed by trend analysis.
