# Supplementary material for: An Integrative Analysis of Transcriptomics and Proteomics Reveals Novel Insights into the Response in the Midgut of Spodoptera frugiperda Larvae to Vip3Aa
Source: Toxins (Basel). 2022 Jan 13;14(1):55. doi: 10.3390/toxins14010055 (PMC8781260; doi:10.3390/toxins14010055)
Supplement: Supplementary file 1 [file toxins-14-00055-s001.zip › toxins-1509842-SI-Table S1-S8.xlsx]

## Sheet: Table S1
Table S1 The list of differently expressed genes in comparison WT vs T1
id	log2(fc)	PValue	FDR	Symbol
FAW_004767	6.01794	3.1565e-33	2.98668e-29	TRYP2
FAW_021888	4.37113	6.99302e-24	3.3084e-20	--
FAW_008609	4.69722	8.63951e-22	2.7249e-18	Pnliprp2
FAW_008705	-4.50043	1.78706e-19	4.2273e-16	TRYP1
FAW_007280	-1.46725	5.54617e-18	1.04956e-14	SHMT1
FAW_005974	-4.11437	2.73096e-17	4.30672e-14	Jon99Cii
FAW_019948	4.44459	3.02048e-16	4.08282e-13	CHYM2
MSTRG.4603	-1.94737	1.51119e-14	1.78736e-11	--
FAW_015722	-2.8617	4.78795e-14	5.03373e-11	tdcB
FAW_003521	-1.84636	6.5188e-14	6.16808e-11	Uro
FAW_002122	-1.29765	7.62944e-14	6.5627e-11	ade5
FAW_001926	2.7597	3.66554e-13	2.89028e-10	--
FAW_016655	4.21759	1.23619e-12	8.99753e-10	Alp-m
FAW_014940	1.29793	2.5091e-12	1.69579e-09	GA10892
MSTRG.2938	2.3218	1.7529e-11	1.10573e-08	--
FAW_012346	-2.4095	7.16386e-11	4.23653e-08	Ldlr
FAW_012409	2.74608	8.1047e-11	4.47771e-08	--
FAW_014885	2.39882	8.51816e-11	4.47771e-08	UGT2B31
FAW_019111	3.57112	1.31026e-10	6.52508e-08	--
FAW_015859	-1.35835	1.70998e-10	8.08993e-08	ATIC
FAW_000712	-2.96137	2.66105e-10	1.19899e-07	SERPINB4
FAW_000658	-2.16373	3.56429e-10	1.53297e-07	Gnmt
FAW_022691	3.38145	1.48706e-09	6.11763e-07	--
FAW_019110	4.28481	1.99781e-09	7.66486e-07	--
FAW_011125	-2.35199	2.02517e-09	7.66486e-07	SULT1C4
MSTRG.7191	3.39553	2.8411e-09	1.03394e-06	--
FAW_020582	-2.06791	4.74724e-09	1.66364e-06	GART
FAW_019650	-3.20081	8.93244e-09	3.01853e-06	UPB1
FAW_006630	-1.06787	1.02941e-08	3.35223e-06	ade2
FAW_008407	12.9617	1.06285e-08	3.35223e-06	--
MSTRG.15377	2.37538	1.12307e-08	3.40673e-06	--
MSTRG.11595	0.894326	1.15214e-08	3.40673e-06	--
FAW_012408	2.69804	1.27376e-08	3.65221e-06	--
FAW_015717	-1.353	1.63206e-08	4.54192e-06	XRCC3
MSTRG.11581	-0.861207	1.84406e-08	4.98529e-06	GST2
FAW_000555	-3.60994	1.9578e-08	5.14574e-06	--
MSTRG.7640	-1.99124	2.15828e-08	5.51937e-06	ITIH4
FAW_012697	1.68085	4.10336e-08	1.02174e-05	bre-4
FAW_006445	-2.5645	7.13219e-08	1.73038e-05	--
FAW_020024	13.3936	8.57628e-08	2.02872e-05	XDH
FAW_008479	-2.46048	8.95078e-08	2.06567e-05	AGAP007347
FAW_005976	-0.873488	1.09593e-07	2.46897e-05	Tmprss9
FAW_005849	-2.37968	2.22012e-07	4.8853e-05	--
FAW_014613	1.89301	2.80279e-07	6.02728e-05	CYP6B6
FAW_021887	3.52397	2.97997e-07	6.26589e-05	--
FAW_007099	2.08188	4.00469e-07	8.23747e-05	--
FAW_012772	-1.61704	5.33973e-07	0.000107499	--
FAW_008620	1.09506	5.75034e-07	0.000113354	ABCG4
FAW_000376	-1.891	6.90689e-07	0.000133373	--
MSTRG.8453	1.93135	7.17992e-07	0.000135873	--
FAW_020605	1.0391	7.55076e-07	0.000137907	Myo31DF
FAW_012413	1.91444	7.59049e-07	0.000137907	--
FAW_003134	-1.60308	7.72468e-07	0.000137907	EN03
MSTRG.7187	3.58747	8.80272e-07	0.000154243	--
FAW_004757	-2.93337	9.19989e-07	0.000158272	deltaTry
FAW_006895	-1.2248	1.41932e-06	0.000239815	CYP6B6
FAW_004754	-2.5716	1.52016e-06	0.000252346	TRYP3
FAW_010916	-1.10247	1.68621e-06	0.000275085	PSPH
FAW_006670	-4.4947	1.82375e-06	0.000289841	LCP17
FAW_000580	0.944158	1.83793e-06	0.000289841	SHANK3
MSTRG.3462	-3.83777	1.89854e-06	0.000294492	CECB
FAW_023261	-1.71849	2.90029e-06	0.000442622	ALDH1B1
FAW_015090	-1.78184	3.11738e-06	0.000468201	Spn27A
FAW_019096	2.16058	3.87629e-06	0.000573086	--
FAW_013030	-2.15754	4.00132e-06	0.000580225	GstS1
FAW_012452	1.17128	4.04722e-06	0.000580225	Gale
FAW_023224	-2.175	4.18039e-06	0.000590371	--
FAW_006917	1.88486	4.41508e-06	0.000614346	--
FAW_010231	-3.12945	4.58331e-06	0.000628511	fpi-1
FAW_014619	-3.43323	5.17691e-06	0.00069977	Prps1
FAW_003909	1.10571	5.43407e-06	0.000724186	NSMAF
FAW_003718	0.939423	5.7394e-06	0.000744105	--
FAW_009457	-1.21533	5.74082e-06	0.000744105	--
FAW_004755	-1.56223	6.65457e-06	0.000850885	deltaTry
FAW_006330	8.56633	7.36224e-06	0.000928821	--
FAW_001925	2.42506	7.83704e-06	0.000975711	b4gat1
FAW_006404	-1.77268	8.10202e-06	0.000995602	Mal-B2
FAW_010141	-2.37322	9.23908e-06	0.00112077	--
FAW_022522	10.8842	1.01938e-05	0.00122093	--
FAW_022101	-4.29709	1.0931e-05	0.00129286	--
FAW_008193	-1.14493	1.12719e-05	0.0013158	MSTN
FAW_023068	2.71937	1.14031e-05	0.0013158	EGT
FAW_015547	-0.784599	1.15734e-05	0.00131937	2021-03-02
FAW_010126	-0.996897	1.22841e-05	0.00136122	E75
FAW_019150	0.871004	1.23721e-05	0.00136122	Ugcg
FAW_021789	-1.08101	1.32286e-05	0.00143873	PPAF2
FAW_007125	5.38159	1.37966e-05	0.00148042	--
FAW_020809	-2.28466	1.39249e-05	0.00148042	cdo1
FAW_018911	-1.15721	1.49144e-05	0.001568	Amy35
FAW_002121	-1.19641	1.5283e-05	0.0015891	Prat
FAW_001985	-3.53042	1.83148e-05	0.00188363	AAEL004701
FAW_014554	-0.986198	1.89976e-05	0.00193286	SLC26A11
FAW_009642	-2.15197	1.98068e-05	0.00199374	--
FAW_008315	-2.03313	2.00314e-05	0.00199513	apolpp
FAW_019943	-4.17183	2.17439e-05	0.00214314	CHYM1
FAW_020402	16.6677	2.20334e-05	0.00214928	Pxd
FAW_017461	9.81557	2.67324e-05	0.00258104	Gld
FAW_017569	1.80488	2.75705e-05	0.00263507	pol
FAW_013221	0.927225	2.82572e-05	0.00267369	Slc16a14
FAW_006081	0.90195	3.07478e-05	0.00288055	Npc1b
FAW_000711	-1.10244	3.14653e-05	0.00291887	--
FAW_006655	-3.10109	3.34701e-05	0.0030747	Prdm1
FAW_008409	17.111	3.66186e-05	0.00333159	--
FAW_004769	3.54861	3.70386e-05	0.00333771	PPAF1
FAW_005038	5.29855	3.76718e-05	0.00336274	CSAD
FAW_007435	-1.54993	3.88169e-05	0.00343257	NEGR1
FAW_009370	-1.70626	4.11777e-05	0.00360763	--
FAW_010247	1.42508	4.36608e-05	0.00379008	Kcnh8
FAW_014718	1.06069	4.63758e-05	0.00398916	Slc30a2
FAW_019199	-1.57739	5.42656e-05	0.00462578	4CL1
FAW_004902	-4.14855	5.6127e-05	0.00474173	l(2)efl
FAW_014760	-1.83258	5.70658e-05	0.00477838	GBA3
FAW_004268	-2.04543	5.78652e-05	0.00480281	CG5009
FAW_004776	2.72092	6.38333e-05	0.00525209	SLC16A3
FAW_000391	-3.08023	6.75923e-05	0.00551343	yrbE
FAW_010818	-1.09354	7.00272e-05	0.00566323	Man2b1
FAW_009066	1.94528	7.4322e-05	0.00595961	RE1
FAW_017951	-3.54877	7.5778e-05	0.00602531	Hsp70Ba
FAW_018104	-1.40322	7.65608e-05	0.00603682	CYP9E2
FAW_009432	-2.23454	8.16502e-05	0.00638491	JHBP
FAW_018060	-3.72473	8.37748e-05	0.00644781	--
MSTRG.11567	0.757174	8.38175e-05	0.00644781	NPC1
FAW_015319	-2.91525	9.01666e-05	0.00688029	PHYH
FAW_011476	1.52408	9.09183e-05	0.00688215	CERS5
FAW_019950	1.4857	9.88263e-05	0.00742139	Sp24D
FAW_010979	-1.89315	0.000100556	0.00749181	Gusb
FAW_013097	-0.718652	0.000106004	0.007836	hsdl2
FAW_001731	-1.67925	0.000111786	0.00819934	HAO1
FAW_016528	-2.11035	0.000119983	0.00872774	--
FAW_004385	1.72285	0.000120834	0.00872774	PNLIPRP2
FAW_019099	2.4841	0.000122064	0.00874974	--
FAW_017272	-1.69878	0.000123019	0.00875191	B1
FAW_020533	2.62657	0.0001258	0.00888295	RE1
FAW_019562	1.95874	0.000131726	0.00923251	--
MSTRG.475	2.52166	0.000143828	0.0100066	--
FAW_005086	-1.11821	0.00014964	0.010335	selenbp1-a
FAW_021227	-0.924079	0.000150987	0.0103524	Gst1
FAW_013079	-0.730253	0.00015264	0.0103735	BPHL
FAW_015446	6.48398	0.000153487	0.0103735	--
FAW_016893	0.913891	0.000154883	0.0103937	VPS13B
FAW_011937	-0.949367	0.000167148	0.0111377	--
FAW_001298	-3.85638	0.000176653	0.0116888	--
FAW_015444	6.53528	0.000180247	0.011762	--
FAW_009431	-1.75079	0.000193625	0.0125339	JHBP
MSTRG.3158	1.08671	0.000194724	0.0125339	PNLIPRP1
FAW_008142	-1.06104	0.000214374	0.0137054	--
FAW_007091	-3.01389	0.000217916	0.0138384	Slc17a5
FAW_001921	-1.84598	0.000221668	0.0139828	Sardh
FAW_005951	-2.15178	0.000242424	0.0151413	4cl1
FAW_000396	-0.913995	0.000243234	0.0151413	Taldo1
FAW_018490	-1.1185	0.000254134	0.0157164	ACAA2
FAW_005629	-0.943336	0.000276018	0.016959	E(spl)mbeta-HLH
FAW_004458	-0.94109	0.000284725	0.0173811	--
FAW_016665	-1.4562	0.000304321	0.0183195	Act88F
FAW_012976	-1.81789	0.000305342	0.0183195	--
FAW_005759	-2.74575	0.000305906	0.0183195	--
FAW_017246	0.967151	0.000313588	0.0186614	nfxl1
FAW_010366	-2.49069	0.00031921	0.0187754	HPGD
FAW_004672	-1.30926	0.000319472	0.0187754	CG2145
FAW_014517	-5.32193	0.000328552	0.0191899	APOD
FAW_020184	-1.34958	0.000334801	0.01933	SLC25A29
FAW_016020	-1.90378	0.000335037	0.01933	SERPINB4
FAW_021884	3.30586	0.000337472	0.0193525	--
FAW_002893	-1.55825	0.000341786	0.0194818	--
FAW_006722	-1.1815	0.000353376	0.0199869	GRP
FAW_016391	0.954485	0.000357559	0.0199869	Blzf1
FAW_006628	-1.78957	0.000359861	0.0199869	Gldc
FAW_010925	0.865446	0.000360283	0.0199869	HIP1
FAW_023242	-1.1866	0.000361209	0.0199869	TKTL1
FAW_013037	3.20945	0.000363596	0.020002	--
FAW_000062	0.922724	0.000366042	0.0200202	wol
FAW_005984	-2.48593	0.000376495	0.0204735	Tmprss2
FAW_004706	-1.16088	0.000380433	0.0205695	bwa
FAW_008401	9.38999	0.000391506	0.0210479	ZBED5
FAW_001157	0.933189	0.000394088	0.021067	PLPP1
FAW_009994	-2.07455	0.000401439	0.0213394	--
FAW_021499	-0.825053	0.000408703	0.0216042	--
FAW_001126	-1.18132	0.000412327	0.0216746	Qdpr
FAW_000829	-1.30118	0.000430091	0.0224835	Amy4N
FAW_005368	1.09129	0.000472322	0.0241923	cue
FAW_006850	4.41665	0.000473005	0.0241923	--
FAW_005212	-3.18057	0.000478976	0.024366	UK114
FAW_017443	-0.957098	0.000504513	0.0255278	LCT
FAW_019947	3.6865	0.000517862	0.0260639	PRSS48
FAW_009800	-1.54316	0.000542802	0.0271746	LCT
FAW_010779	-1.31459	0.000555954	0.0276865	SLC25A44
FAW_010215	-1.72609	0.000562935	0.0278874	--
FAW_017765	2.02106	0.000568962	0.0280392	--
FAW_016636	-1.96277	0.000572173	0.0280513	--
FAW_005027	-5.81592	0.000585402	0.028552	X-element\ORF2
FAW_004530	-2.81087	0.000608753	0.0295293	--
FAW_007793	-1.61044	0.000611682	0.0295293	--
FAW_019628	1.13874	0.00063721	0.0306055	Orct
FAW_011724	-1.12891	0.000663667	0.031704	--
FAW_013176	1.34068	0.000666783	0.031704	PNLIP
MSTRG.11561	-1.29728	0.000670606	0.0317264	Agrn
FAW_014382	-1.86355	0.000679254	0.0319756	yxbG
FAW_010555	0.614501	0.000684154	0.0320469	Osbpl8
FAW_016804	-1.93963	0.000704535	0.032839	Myo15a
FAW_016475	-1.78812	0.000716855	0.0332494	--
FAW_002130	0.73858	0.000728148	0.0335765	Tdpoz4
FAW_003748	-1.49406	0.000731003	0.0335765	--
FAW_012414	1.99262	0.000737365	0.033705	--
FAW_018564	-2.12359	0.000768335	0.0349518	gnbp1
FAW_000158	-0.618648	0.000781041	0.0353599	--
FAW_000257	-1.81318	0.000808226	0.0364163	ovo
FAW_015271	-0.74517	0.000816848	0.0366304	Tktl2
FAW_006918	-2.6417	0.000832119	0.0371392	slc46a1
FAW_001623	-0.609228	0.000838968	0.0372691	polo
FAW_003958	-1.3173	0.000849691	0.0375691	CPVL
FAW_001650	1.69777	0.000856662	0.0375821	pol
FAW_004678	-1.08474	0.000862673	0.0375821	PDZD2
FAW_008745	0.614232	0.00086295	0.0375821	Abcc10
FAW_004756	-1.92127	0.000865874	0.0375821	betaTry
FAW_015238	1.27877	0.000895224	0.0386786	TRYP7
FAW_001665	-2.1571	0.000922808	0.0396891	B1
FAW_017020	0.801436	0.000931282	0.0398724	Gramd1b
FAW_003358	-0.883652	0.000975214	0.0415652	Hn
FAW_007065	0.811204	0.000997522	0.0423254	SLC17A5
FAW_018666	-1.29443	0.0010092	0.0426297	--
FAW_010356	-1.02748	0.00101572	0.0427145	CTSH
FAW_011628	1.01792	0.00104632	0.043702	l(2)03659
FAW_011245	-2.58028	0.00104844	0.043702	--
FAW_010230	1.18076	0.00107762	0.0447212	SOAT1
FAW_000268	-2.55686	0.00110011	0.0454552	--
FAW_006975	-1.77629	0.00112927	0.0464573	--
FAW_001776	0.881965	0.00114343	0.0468362	AAEL003512
FAW_018286	-0.677509	0.00116713	0.0473477	GALM
FAW_020612	0.626859	0.00117093	0.0473477	Slc7a1
FAW_022560	1.01076	0.00118272	0.0476206	--
FAW_005979	-3.97964	0.00120702	0.0481889	Jon99Cii
FAW_017856	-1.79891	0.00122061	0.0485269	--
MSTRG.15834	-1.26208	0.00124357	0.0492327	--
FAW_007744	-1.59638	0.00125432	0.0494514	SDR-1
FAW_001942	-0.884523	0.00130615	0.0508122	GstZ1
FAW_007862	1.25477	0.00131271	0.0508122	--
FAW_016081	1.25477	0.00131271	0.0508122	--
FAW_004608	-1.96611	0.00131568	0.0508122	--
FAW_009381	-0.96269	0.00134482	0.0517264	--
FAW_004684	-1.26109	0.00138228	0.052952	ENOSF1
MSTRG.8135	-0.728113	0.00142602	0.0539584	--
FAW_006993	-0.848979	0.00142633	0.0539584	B1
FAW_007244	1.12936	0.00143923	0.0539584	--
FAW_005048	-0.634854	0.00144134	0.0539584	SJCHGC01960
FAW_000611	7.96578	0.00144149	0.0539584	cscA
FAW_016818	0.796692	0.00144277	0.0539584	fz2
FAW_016234	-0.62506	0.00147529	0.0549574	Mcm3
FAW_016225	-1.235	0.00151274	0.0561316	--
FAW_001559	1.63148	0.00154958	0.0572738	SLC19A1
FAW_020869	0.799383	0.00156046	0.0573048	CYP6B6
FAW_008404	14.5994	0.00156253	0.0573048	--
FAW_006320	-1.23113	0.0015709	0.0573895	ALPL
FAW_017988	-4.07676	0.00159779	0.057919	VG
FAW_014441	-2.12928	0.00160192	0.057919	--
FAW_005056	-1.10019	0.00160376	0.057919	emc
FAW_013236	-1.17178	0.00163062	0.058665	CYP9E2
FAW_000322	0.7613	0.00165025	0.0591466	BEST2
FAW_000023	-1.06275	0.00168143	0.059811	SPON1
FAW_008093	8.00375	0.00171483	1	--
FAW_003388	1.11987	0.00173202	0.0611506	ush
FAW_018869	0.707644	0.00174942	0.0615355	Esf1
FAW_007011	-5.9645	0.00176157	0.0617333	NT1
FAW_007323	0.62072	0.00182038	0.0633252	FucTC
FAW_013049	-1.42078	0.00185281	0.0642171	CG1544
FAW_009474	-2.35958	0.00189856	0.0655628	--
FAW_010334	0.975344	0.00192399	0.0661993	Wdr46
FAW_002342	8.88671	0.00193054	1	pol
FAW_014786	0.875485	0.00194049	0.066525	OSBPL6
FAW_019719	-1.31664	0.00197784	0.0673176	D11DS
FAW_016478	-1.76317	0.00200603	0.0680324	--
FAW_021501	-1.34971	0.00201585	0.0681213	SERPINB9
FAW_014789	-0.936964	0.0020263	0.0682284	LCP2
FAW_008347	-0.791484	0.00205915	0.068847	l(2)dtl
FAW_019382	-2.91803	0.0020879	0.0695622	--
FAW_010051	1.71049	0.00217528	0.0722191	RE1
FAW_022816	-0.856299	0.00221922	0.0734206	--
MSTRG.11339	-2.07688	0.00223821	0.0737842	--
FAW_011319	-1.58281	0.00224581	0.0737842	glpF6
FAW_006831	-0.762571	0.00229017	0.0749812	--
FAW_020172	-1.44174	0.0023171	0.0754317	--
FAW_008605	-1.72016	0.00232421	0.0754317	Lipg
FAW_012343	-0.91244	0.00232784	0.0754317	fdl
FAW_018793	-1.65852	0.00236217	0.0760232	--
FAW_003360	-3.01707	0.00237711	0.0762447	ppl
FAW_009718	-1.26202	0.00241069	0.0770608	ANPEP
FAW_019300	-1.52257	0.00243993	0.0776685	LAMC3
FAW_011015	0.597192	0.00245043	0.0776685	CG3149
FAW_007416	-1.41504	0.00245433	0.0776685	rep
FAW_006571	1.07132	0.00247541	0.0780581	AAEL008004
FAW_003370	0.646989	0.00248314	0.0780581	SUCO
FAW_009684	1.09718	0.00249741	0.0782129	pol
FAW_012831	-1.64346	0.0025046	0.0782129	tll1
FAW_018404	-0.65747	0.00254604	0.078969	AGXT2
FAW_018299	0.840664	0.00255933	0.078969	Uhrf1bp1l
FAW_019653	0.805244	0.0025622	0.078969	Pip4k2b
FAW_004768	2.42388	0.00257647	0.0789819	TRYP2
FAW_020203	-0.624128	0.00257931	0.0789819	--
FAW_019656	-1.55242	0.00259993	0.0793565	--
FAW_005772	-1.10344	0.0026132	0.0795052	FH
FAW_005183	-1.60674	0.00262948	0.0797442	GGH
FAW_018285	-1.40078	0.00266677	0.0806164	AGAP002721
FAW_007844	-8.82443	0.00267589	1	Gld
MSTRG.13687	0.866891	0.00268451	0.0808943	FucTC
FAW_003235	-0.772446	0.0026988	0.0810668	Phgdh
FAW_017504	-1.72674	0.00274366	0.0821536	Ush1g
FAW_017039	-1.93702	0.00275665	0.0822821	--
FAW_012947	-2.84084	0.00281183	0.0836652	P
FAW_001442	-1.09741	0.00291658	0.086322	CYP6B6
FAW_019566	-3.10434	0.00291936	0.086322	F10
FAW_012121	-1.48528	0.0029479	0.0868943	Spn77Ba
FAW_012049	-1.54112	0.00300999	0.0884489	npl-b
FAW_017688	-1.19562	0.00304794	0.0892473	ENGASE
FAW_008174	-1.21551	0.00305603	0.0892473	--
FAW_007620	8.54432	0.00307811	1	--
FAW_006717	0.863022	0.00308007	0.0896726	ATP13A3
FAW_019970	0.625033	0.00312529	0.09071	Myo5a
FAW_015535	-2.3322	0.00314589	0.0909401	--
FAW_001927	2.97269	0.00315244	0.0909401	CFDP2
FAW_006331	-3.29177	0.00318403	0.0914561	pxt
FAW_017990	-3.46644	0.00318965	0.0914561	VG
FAW_015662	0.842982	0.00321361	0.091694	ETS2
FAW_019026	1.0072	0.00323626	0.0919564	--
FAW_002628	-1.6364	0.00325347	0.0921685	--
FAW_004049	-1.02133	0.00329551	0.0928525	sox21b
FAW_008434	0.88422	0.00329724	0.0928525	--
MSTRG.8452	0.922265	0.0034637	0.0964005	--
FAW_020700	-1.77743	0.0034649	0.0964005	Hmcn2
FAW_001658	-1.02325	0.00347117	0.0964005	pnbA
FAW_022010	1.14906	0.00347417	0.0964005	TOLLIP
FAW_016123	-0.833213	0.00349323	0.0964197	Ndufa4
FAW_008727	0.725077	0.00349524	0.0964197	lid
FAW_011471	-1.51753	0.00351485	0.0966788	Prss8
FAW_006938	-0.621274	0.00354938	0.0973455	--
FAW_010536	0.778858	0.00356619	0.097524	Rexo4
FAW_020579	1.21779	0.00362117	0.0984585	HEXB
FAW_003771	1.4867	0.00363274	0.09849	--
FAW_012843	-1.21309	0.00365717	0.0986392	cuta
FAW_011838	0.724959	0.00365909	0.0986392	FAR1
FAW_010194	-1.71908	0.00367196	0.0987047	Cht10
FAW_019270	0.922345	0.00369651	0.0990831	CBR1
FAW_009839	1.44359	0.00372365	0.0994359	CTRL
FAW_004650	-2.69587	0.00373069	0.0994359	TMPRSS15
FAW_004759	0.777682	0.00377961	0.100457	AAEL007818
FAW_011944	-0.758565	0.0037964	0.100521	--
FAW_008215	0.629758	0.00380327	0.100521	--
FAW_006376	0.859601	0.00385028	0.10148	Tet
FAW_009532	1.09779	0.00396337	0.104077	n4bp3-b
FAW_016029	-1.12233	0.00397518	0.104077	JHEH
FAW_004560	0.851658	0.00398181	0.104077	Hsf
FAW_001772	-0.80652	0.00402269	0.104856	--
FAW_001510	0.828699	0.00406728	0.105437	--
FAW_017058	0.863964	0.00409028	0.105631	Fur1
FAW_012109	-2.09259	0.00409709	0.105631	--
FAW_005655	0.626036	0.00417358	0.107311	Tor
FAW_000224	-1.71953	0.00419206	0.107494	--
FAW_015605	-1.37932	0.00420628	0.107567	ea
FAW_014596	-0.732207	0.00428377	0.109253	ALDH2
MSTRG.12051	1.61229	0.00437801	0.111058	--
FAW_008898	-11.6662	0.00441958	0.111813	--
FAW_000862	-0.851021	0.00444566	0.112125	Hsd17b4
FAW_000156	-0.774956	0.00445563	0.112125	wupA
FAW_012496	0.875369	0.00447202	0.112239	gmppa
FAW_007637	-2.4107	0.00452691	0.113017	--
FAW_018363	-2.96227	0.00454696	0.113219	PGRP
FAW_002413	9.22882	0.00468525	1	gag
FAW_019206	1.61042	0.0046906	0.116184	--
FAW_008212	0.693531	0.0048274	0.119261	RhoGAPp190
FAW_012804	-0.870826	0.00488755	0.120006	agmo
FAW_005857	-0.64689	0.00489089	0.120006	4CL3
FAW_014588	0.708878	0.00490831	0.120006	Arhgap21
FAW_005881	0.920721	0.0049551	0.120534	foxn3
FAW_018128	-1.47181	0.00495537	0.120534	CRISP3
FAW_001587	0.598349	0.00499126	0.120799	Hbs1l
FAW_015176	-1.66377	0.00499662	0.120799	--
FAW_018582	-1.30917	0.00500456	0.120799	--
FAW_009733	-0.721326	0.0050714	0.121929	Tspo
FAW_022281	-1.60007	0.00507717	0.121929	LIPC
FAW_014982	2.2137	0.00510603	0.122064	RGN
FAW_008676	0.751596	0.00512904	0.122064	Wdfy3
MSTRG.16703	1.32135	0.00513437	0.122064	--
FAW_001051	-0.672507	0.00514946	0.122116	l(2)efl
FAW_021360	-0.983205	0.00517037	0.122305	UGT2B13
FAW_008443	1.44473	0.00520702	0.122865	--
FAW_008487	0.688305	0.00523583	0.123237	tmem87a
FAW_003605	0.89828	0.00536246	0.125105	DOLPP1
FAW_012973	-1.47772	0.00536808	0.125105	Cyt-b5-r
FAW_010374	1.32996	0.00540956	0.125762	Nox4
FAW_011844	-0.590304	0.00547818	0.126781	--
FAW_016260	0.956414	0.00548017	0.126781	Pxd
FAW_013031	-2.21576	0.00554926	0.128066	HPGDS
FAW_017989	-3.75666	0.00559227	0.128745	VG
FAW_015603	-1.45785	0.00566264	0.130048	ea
FAW_012939	1.70951	0.00568425	0.130058	Cyp304a1
FAW_007465	0.850549	0.00569055	0.130058	--
FAW_004386	-1.13721	0.00573134	0.130493	Lipc
FAW_020684	0.737406	0.00573715	0.130493	ERN1
FAW_007924	-3.71149	0.00578347	0.131231	jockey\pol
FAW_011123	-0.861158	0.00583451	0.132072	--
FAW_004766	5.17991	0.00585333	0.132182	alphaTry
FAW_014563	0.586466	0.00589813	0.132876	AP1G1
FAW_010377	1.06694	0.00593009	0.133279	hd
FAW_004033	2	0.00594692	0.133341	rep
FAW_015625	-0.81522	0.00596565	0.133444	pug
FAW_020399	-1.42269	0.00602872	0.134537	Pxd
FAW_012433	-1.89662	0.00605507	0.13474	XKR5
FAW_018085	-1.57691	0.00606631	0.13474	l(2)efl
FAW_012958	0.99631	0.00608812	0.134908	TRYP4
FAW_009573	-1.01501	0.00612876	0.135491	--
MSTRG.12726	-1.89828	0.00616804	0.135845	--
FAW_010369	0.964791	0.00617345	0.135845	NOS
FAW_010151	0.871473	0.00625071	0.136908	Pex23
FAW_015378	4.93074	0.00626932	1	--
FAW_007628	-2.25146	0.00631162	0.137923	fabG
FAW_022711	-1.12644	0.00636	0.138485	--
FAW_018546	1.23555	0.0063779	0.138485	Plpp2
FAW_001509	2.18312	0.00638126	0.138485	--
FAW_003524	0.607888	0.00639633	0.138495	dus3l
FAW_007636	-0.906541	0.00651874	0.140182	NUP88
FAW_004661	-0.97641	0.00656352	0.140826	CYP4C1
FAW_015677	3.93411	0.00672799	0.144028	CBS
FAW_004919	-3.05406	0.00677099	0.144597	l(2)efl
FAW_009421	-9.05889	0.00695479	0.147548	RE1
FAW_011687	-1.24154	0.00706205	0.149488	wat
FAW_007632	-1.30344	0.0070803	0.14954	fabG
FAW_010055	-2.15401	0.00709852	0.149591	Mbl1
FAW_019654	-0.88608	0.00713856	0.1501	--
FAW_000699	-0.930369	0.00726135	0.152343	TGM1
FAW_008395	-0.679239	0.00742757	0.155145	FAM151B
FAW_001676	0.652348	0.00744192	0.155145	trip12
MSTRG.3709	-1.32786	0.00744408	0.155145	Orct
FAW_001123	-0.600702	0.00746592	0.155258	mdh
FAW_002390	-0.906305	0.00771825	0.15884	LanA
FAW_019580	-0.982077	0.00772185	0.15884	ATP6V0E2
FAW_014577	0.637007	0.00773525	0.15884	ALKBH4
FAW_007329	-0.915491	0.00773683	0.15884	SLC25A38
FAW_007792	2.24004	0.00773888	0.15884	Aspg
FAW_019673	0.743545	0.00777466	0.159229	Dpagt1
FAW_010663	-1.52135	0.0078174	0.159759	Gel
FAW_020602	-0.873541	0.00784586	0.159995	--
FAW_017953	-2.06523	0.00786999	0.160061	Hsp70Ba
FAW_006486	-0.778306	0.00788294	0.160061	FOXN1
FAW_001706	-1.55275	0.00794349	0.160601	--
FAW_020955	-2.60475	0.00800474	0.161494	Tret1
FAW_001666	-4.4667	0.00814217	0.163918	Est-6
FAW_004051	-0.731255	0.00821206	0.164974	CycB3
MSTRG.16674	-3.75291	0.00831243	1	--
FAW_004269	-0.980955	0.0083358	0.167105	CG5009
FAW_004849	-0.656017	0.00837203	0.167476	Adi1
FAW_017673	-1.28904	0.0084208	0.168096	--
FAW_018242	-0.79985	0.00847935	0.168909	clvs2
FAW_017880	1.27496	0.00854434	0.169846	--
FAW_002698	0.608335	0.00861515	0.170628	DIP2
FAW_019269	-1.029	0.00861977	0.170628	Cbr3
MSTRG.1609	-1.37274	0.00874725	0.17279	--
FAW_010653	-1.48342	0.00881429	0.173752	Mcfd2
FAW_008536	0.909353	0.00891826	0.175237	--
FAW_007503	0.590523	0.00892666	0.175237	pit
FAW_002063	-0.91268	0.00895921	0.175512	nas-14
FAW_005848	-1.63565	0.00901393	0.175802	--
FAW_020201	1.02931	0.00902711	0.175802	ABCC1
FAW_005743	-1.42029	0.00905413	0.175802	acp7
FAW_015084	-1.96802	0.00905982	0.175802	SERPINB14B
FAW_016381	0.834296	0.00906694	0.175802	MPI
FAW_019334	-0.966134	0.00909881	0.176059	STMN4
FAW_001116	-1.31783	0.00917706	0.176506	DDO
MSTRG.1928	-1.04277	0.00919811	0.176506	--
FAW_006979	-4.05115	0.00921519	0.176506	--
FAW_018568	1.02586	0.00925083	0.176567	--
FAW_014618	-2.09516	0.00931077	0.177261	GST1
FAW_020757	-0.785184	0.00935766	0.177795	RfC4
FAW_010252	0.825469	0.00940478	0.177976	MRPL16
FAW_004974	0.846048	0.00945662	0.178375	Abp1
FAW_003662	0.693347	0.00946359	0.178375	TMEM189
FAW_003939	1.24365	0.00957827	0.180178	qua
FAW_004255	-0.791318	0.00959812	0.180193	dnk
FAW_018894	2.152	0.00963846	0.180592	--
FAW_013011	-2.11189	0.00967533	0.180925	--
FAW_001871	0.677172	0.00971342	0.181279	SLC7A9
FAW_009077	-1.1713	0.00974514	0.181323	B1
FAW_019019	1.18834	0.00977987	0.181323	--
FAW_005982	-0.902893	0.00979244	0.181323	Cela1
FAW_012030	-1.30717	0.00989533	0.18287	APOD
FAW_018667	-2.01049	0.0100757	0.185479	COX7C
FAW_005457	-8.46489	0.0101277	1	BJSP-2
FAW_008061	1.27372	0.0101618	0.186701	--
FAW_005366	0.61996	0.0103244	0.188732	SVIL
FAW_007558	-1.89176	0.0103322	0.188732	--
FAW_010255	0.806408	0.0104426	0.190381	phm
FAW_020114	0.960693	0.0105257	0.191528	--
FAW_015082	-1.38637	0.0107226	0.193991	SERPINB1
FAW_013028	-11.3163	0.0109289	0.196649	GstS1
FAW_007139	1.83625	0.0109526	0.196649	y
FAW_015017	-1.18985	0.0110996	0.198534	AMT
FAW_014582	0.871485	0.0112464	0.20078	w
FAW_011769	0.627713	0.0112769	0.200945	SNX6
FAW_003083	-0.637842	0.0113511	0.201887	scu
FAW_014580	0.786939	0.0114059	0.202481	Nsun5
FAW_018102	-1.71488	0.0114707	0.20325	CYP6B7
FAW_005054	1.22145	0.0114922	0.203251	PCAS-1
FAW_019353	-0.712076	0.0115454	0.203431	MIF
FAW_001007	0.684646	0.0116114	0.204214	Tf2-12
FAW_023132	2.99095	0.0118259	0.207247	RTase
FAW_020037	-2.25691	0.0118276	0.207247	--
FAW_004619	-1.16857	0.0119072	0.208256	--
FAW_001285	-5.1224	0.0120403	0.210194	--
FAW_019911	3.04439	0.0120414	1	Tf2-12
FAW_005537	-1.63901	0.012081	0.210517	--
FAW_001497	-1.32585	0.0122665	0.212965	--
FAW_011564	0.82874	0.0123173	0.213455	CHKB
FAW_010409	-7.49185	0.012372	1	jockey\pol
FAW_000959	-4.1587	0.0125008	0.216239	EbpIII
FAW_013232	-1.41005	0.0125294	0.216339	cpnA
FAW_009553	-3.52583	0.012572	0.216679	--
FAW_020827	0.645788	0.0126212	0.216749	chb
FAW_013204	-2.63559	0.0126411	0.216749	sno1
FAW_019370	-1.41181	0.0126449	0.216749	VCP
FAW_018544	-3.11924	0.0127221	0.217661	adt-1
FAW_011456	1.14078	0.0127668	0.217661	--
MSTRG.12385	0.897701	0.0127948	0.217742	Tmem164
FAW_000970	-2.83158	0.0128456	0.218214	--
FAW_012095	7.38082	0.0129089	1	--
FAW_007845	-1.2202	0.0129359	0.21898	NCAPG
FAW_020638	-1.1854	0.0129743	0.21898	Slc17a5
FAW_017038	-1.36629	0.0130324	0.219418	--
FAW_009291	0.839057	0.013087	0.219556	Orct2
FAW_017035	-1.48852	0.0131383	0.220026	PNLIPRP2
FAW_010083	0.814234	0.0131668	0.220113	DAGLB
FAW_000151	-1.63826	0.0131906	0.220123	--
FAW_007736	-0.674569	0.0132215	0.22025	Cdk1
FAW_008292	-0.587043	0.0132762	0.220318	CBR1
FAW_017258	-1.03055	0.0133192	0.220318	SLC27A1
FAW_018487	-0.596402	0.0133284	0.220318	ACAA2
FAW_017500	-1.22161	0.0133323	0.220318	SERP1785
FAW_008386	-10.2487	0.0133348	1	--
FAW_004282	-0.676125	0.013342	0.220318	mai-2
FAW_020302	0.619728	0.0133906	0.22056	LDB2
FAW_006333	9.82972	0.0134166	0.22056	Pxd
FAW_008059	4.14684	0.0135106	1	--
FAW_007144	0.657887	0.0135372	0.221991	ABCA3
FAW_017041	-1.49957	0.0136473	0.222514	Cht10
MSTRG.6181	1.51136	0.0136746	0.222514	--
FAW_019648	-1.39672	0.0136845	0.222514	svp
FAW_021222	-0.794381	0.0136866	0.222514	--
FAW_007951	0.813388	0.0139704	0.226737	Wdr18
FAW_009405	-1.66013	0.0140742	0.227381	--
FAW_019528	-2.03415	0.0140829	0.227381	--
FAW_005672	1.47393	0.014106	0.227381	--
FAW_022892	-0.857221	0.0141062	0.227381	RE1
FAW_000545	-0.683672	0.0142033	0.228178	Pgrmc1
FAW_017193	-2.82874	0.014234	0.228178	AGRN
FAW_014847	-1.73284	0.0142596	0.228178	pol
FAW_008285	0.775562	0.0142762	0.228178	Mphosph10
FAW_000510	-2.60433	0.0143183	1	TMLHE
FAW_001818	-1.5667	0.0143203	0.228496	--
FAW_004067	-0.828927	0.0145173	0.231251	CACNB1
FAW_018561	1.29311	0.0145536	0.231404	Tf2-12
MSTRG.4589	-1.62461	0.0145759	0.231404	EbpIII
FAW_009247	-0.691687	0.014668	0.232477	CDC20
FAW_013027	0.801037	0.0147081	0.232599	GIP
FAW_021567	1.68281	0.0147253	0.232599	neur
MSTRG.13028	2.00592	0.0147495	0.232599	--
FAW_008594	-0.931798	0.0149304	0.235061	Aldh1b1
FAW_014678	-1.8027	0.0152759	0.2401	--
MSTRG.4169	-3.33735	0.0153533	1	--
FAW_022022	-4.40498	0.0154221	0.241597	--
FAW_018308	0.599634	0.0157098	0.244792	Rbm28
FAW_000234	0.848519	0.0157427	0.244792	path
FAW_009053	-1.08741	0.0157525	0.244792	--
FAW_009323	0.638393	0.0157739	0.244792	Smox
FAW_021796	-0.760463	0.0157813	0.244792	ACLY
FAW_021019	0.720462	0.015885	0.245997	--
FAW_017347	-1.59499	0.0160009	0.246983	--
FAW_021510	0.588314	0.0162181	0.249927	SYNJ1
FAW_003136	2.02323	0.0163486	0.25153	--
FAW_000650	-3.71621	0.0166841	1	--
FAW_007502	0.759503	0.016811	0.257387	pit
FAW_010631	-0.908437	0.0168915	0.258202	asf1
MSTRG.6682	0.611308	0.0170008	0.259264	TOLLIP
FAW_020011	0.889899	0.0170386	0.259264	--
FAW_009073	4.61949	0.0171961	0.261172	B1
FAW_011873	-1.20493	0.0173805	0.26323	--
FAW_020374	-8.90689	0.0175501	1	Ddo
FAW_008679	-1.08345	0.017689	0.26737	Acy1
FAW_000889	0.802572	0.0177874	0.268428	Tf2-12
FAW_020866	-1.62514	0.0179144	0.269914	kynU
FAW_018173	0.936105	0.0179881	0.27046	CYP6B6
FAW_007461	-1.01802	0.0180078	0.27046	--
FAW_007162	-2.2384	0.0181055	0.271068	MCYG_01475
FAW_004006	9.61961	0.0181352	1	CP66
FAW_002223	2.72489	0.0181546	0.271373	RTase
FAW_016028	-1.04434	0.0183298	0.273559	JHEH
FAW_011133	-3.40247	0.0186053	0.276418	--
FAW_015001	1.33593	0.0187	0.2769	--
FAW_010593	0.941708	0.0187915	0.277661	orb2
MSTRG.2533	-1.29879	0.01881	0.277661	--
FAW_005459	-0.795206	0.0189043	0.278238	BJSP-2
FAW_008552	-0.760224	0.0189374	0.278238	Paqr3
FAW_008584	1.78652	0.0190654	0.279685	--
FAW_007547	-1.09189	0.0191062	0.27985	--
FAW_006011	-0.932829	0.0192067	0.280887	nkx2.2a
FAW_019870	-1.09642	0.0193719	0.282461	Ppme1
FAW_020839	0.920888	0.0193741	0.282461	Slc16a12
FAW_017462	12.4173	0.0195337	0.283987	Gld
FAW_011166	-3.45003	0.0197538	0.286359	--
FAW_003776	-2.32021	0.0197838	0.286359	HR38
FAW_014457	1.25869	0.0197927	0.286359	--
FAW_013233	1.82491	0.0198813	0.286794	X-element\ORF2
FAW_022201	-1.24532	0.0198834	0.286794	--
FAW_022381	-1.57176	0.0200485	0.288452	Tf2-12
MSTRG.6913	2.40939	0.0200536	1	--
FAW_008352	0.595361	0.0201013	0.288452	fabG
FAW_018792	-1.17509	0.0201508	0.288452	--
FAW_011128	-0.801393	0.0202657	0.289659	SULT1C4
FAW_006410	-1.37851	0.0204641	0.292053	ABCG2
FAW_003026	-0.937605	0.0205678	0.292662	Plod3
FAW_004903	-1.22661	0.0205876	0.292662	--
FAW_000750	-0.847617	0.0206195	0.292662	dpa
FAW_017297	-1.07517	0.0206304	0.292662	--
FAW_018663	1.20645	0.0207069	0.292867	MGAT1
FAW_016584	-0.708433	0.0208363	0.293207	SCP2
FAW_010298	-1.75103	0.0208615	0.293207	FUCA1
FAW_020152	0.984072	0.0209066	0.293207	GIP
FAW_015898	1.75733	0.0209168	0.293207	--
FAW_021436	-0.698236	0.0210737	0.294969	Slc9a3r2
FAW_006795	-0.742464	0.0211729	0.295483	GST1
FAW_008577	-1.11475	0.0212505	0.29613	Sp7
FAW_021016	0.655714	0.0213776	0.297463	--
FAW_005997	0.686575	0.0215032	0.29764	UGT2B14
FAW_009882	-1.16641	0.0215537	0.29764	--
FAW_012540	0.599559	0.0215791	0.29764	Selenoi
FAW_021421	2.25132	0.0217191	0.297782	--
FAW_017387	-1.63716	0.0217209	0.297782	--
FAW_018047	0.966057	0.0217258	0.297782	Slc41a2
FAW_016102	-1.21948	0.0217467	0.297782	--
FAW_011143	-1.46072	0.0218131	0.29809	--
FAW_000262	2.03402	0.0218322	0.29809	Cyp4g15
FAW_008567	-0.797281	0.0219721	0.299568	Mp20
FAW_010228	0.631068	0.0220337	0.299975	--
FAW_001488	0.786834	0.0221505	0.300879	Ano1
FAW_021078	1.73131	0.0223221	0.302595	Arsj
FAW_001836	-1.54344	0.0226359	0.305114	slc20a1
FAW_004428	-1.64243	0.0226476	0.305114	Ca13
FAW_009498	-0.675815	0.0226691	0.305114	CSA
FAW_004816	-2.03526	0.0227211	0.305162	lft
FAW_008256	-1.2776	0.0227371	0.305162	PRTN3
FAW_013258	0.729583	0.0228137	0.305418	Slc26a11
FAW_009250	0.969056	0.0228208	0.305418	Tollo
FAW_020949	0.958347	0.0229497	0.306283	Casp7
FAW_007976	-1.62516	0.0229726	0.306283	--
FAW_020630	1.3598	0.0229826	0.306283	C38C10.2
FAW_005786	0.776152	0.0230749	0.307082	LPGAT1
FAW_019872	0.640919	0.0231498	0.307645	R3HCC1L
FAW_017166	0.638916	0.023376	0.309565	APN2
FAW_000644	0.908732	0.0235188	0.310803	BCHE
FAW_022224	-0.704882	0.0236075	0.311254	pol
FAW_007064	0.614134	0.0237074	0.311254	Slc17a5
FAW_004396	-1.78307	0.0237174	0.311254	LCP30
FAW_000039	-1.58496	0.0237588	0.311365	ABTB2
FAW_004366	-0.601451	0.0238841	0.312574	TY3B-I
FAW_017344	-1.76066	0.0241107	0.313525	--
FAW_012809	-2.32487	0.0241224	0.313525	--
FAW_022642	1.29308	0.024228	0.314465	PNLIP
FAW_014458	1.10861	0.0243661	0.315824	pol
FAW_008976	3.58496	0.0243942	1	--
FAW_015681	-0.752381	0.0245286	0.316684	--
FAW_000044	-1.28666	0.0245761	0.316684	--
FAW_016587	-0.728013	0.0246168	0.316684	--
FAW_005854	-0.701939	0.0246585	0.316684	4CL1
FAW_002068	1.11392	0.0246667	0.316684	ARRB1
FAW_020817	-2.58496	0.0250027	0.32016	--
FAW_012340	0.664656	0.0250315	0.32016	ATP11B
FAW_002596	-3.46761	0.0250592	1	--
FAW_019319	2.34792	0.0251956	0.321728	--
FAW_019373	-1.26981	0.0252873	0.322465	At1g60420
FAW_021249	6.40939	0.0253281	1	jockey\pol
FAW_008878	0.700071	0.0254012	0.323281	Htt
FAW_006055	-0.801334	0.0254292	0.323281	fend
FAW_006981	-1.33255	0.02546	0.323281	--
FAW_020852	-0.703781	0.0254889	0.323281	MYORG
FAW_009293	0.825026	0.0255352	0.323281	Orct
FAW_000886	-0.73879	0.0259038	0.326368	leprot
FAW_004905	-1.37678	0.0264363	0.332192	CTH
FAW_023144	8.24476	0.0265141	1	--
FAW_009914	1.36805	0.0265766	0.333512	--
FAW_001786	-1.0707	0.0266603	0.333677	psuG
FAW_005560	0.671634	0.0268253	0.334864	gus
FAW_000965	-2.84506	0.026826	0.334864	EbpIII
FAW_013247	0.851265	0.0269117	0.335492	--
FAW_005019	1.00409	0.027026	0.336473	--
FAW_019704	1.22294	0.0271188	0.337186	Scd1
FAW_016216	-0.599432	0.0271688	0.337363	SLC22A4
FAW_005462	-4.13327	0.0273102	0.338571	SP2
FAW_005020	1.19669	0.0273376	0.338571	PGBD2
FAW_006449	-0.703733	0.0274102	0.338686	Papss1
FAW_007840	0.814893	0.0274185	0.338686	--
FAW_000635	0.646814	0.0275076	0.339344	Pwp2
FAW_017636	-1.18717	0.0276309	0.339757	brn
FAW_018852	-4.97837	0.0279516	0.342067	--
FAW_008732	-1.01511	0.0279573	0.342067	ft
FAW_001246	-2.18709	0.0280051	0.342067	GIP
FAW_006862	-1.51028	0.0280349	0.342067	--
FAW_005349	-0.603227	0.0281412	0.342067	Eci1
FAW_015544	1.09285	0.0281673	0.342067	Smug1
FAW_000505	0.670958	0.0281983	0.342067	--
FAW_015953	-2.80735	0.0282424	1	POLE3
FAW_007657	-1.01894	0.0283349	0.343203	CYP6B7
FAW_009654	-0.835046	0.0286299	0.345593	RGN
FAW_022561	0.922025	0.0287081	0.345593	--
FAW_008210	-1.55818	0.0287891	0.346128	--
FAW_008645	-0.598927	0.0289001	0.346826	PIK3AP1
FAW_011331	-1.32738	0.0289205	0.346826	MFB1
FAW_022869	0.638086	0.0289637	0.346904	EFL1
FAW_010283	-2.27392	0.029307	0.350077	--
FAW_008833	-1.40018	0.0293749	0.350077	Tret1
FAW_007314	1.8435	0.0294966	0.351065	--
FAW_006296	-2.13496	0.0296041	0.351663	--
FAW_011404	-0.708417	0.0296212	0.351663	akr2e
FAW_005803	2.16993	0.0298012	0.353357	FASN
FAW_003293	-0.753114	0.0298666	0.353689	Man2a1
FAW_022426	2.30933	0.0300193	0.35461	pol
FAW_005405	-0.634236	0.030073	0.354801	CG5235
FAW_008538	-0.620801	0.0304293	0.358111	MDH1
FAW_000659	-1.06649	0.0305454	0.358194	SEC61G
FAW_018054	-2.8126	0.030573	0.358194	LEB4
FAW_017033	-1.40478	0.0307891	0.360107	Pnliprp2
FAW_014486	0.585767	0.0313528	0.365845	ADGRG1
FAW_007393	-2.33897	0.0313745	0.365845	Abd-B
FAW_018794	-2.35443	0.0314005	1	--
FAW_000037	0.643139	0.0314408	0.365845	cept1
FAW_008622	0.601641	0.0314701	0.365845	TMEM62
FAW_021990	-4.75489	0.031606	0.36649	--
FAW_009055	8.04075	0.0316701	1	--
MSTRG.15968	0.761395	0.0318795	0.367624	stk10
FAW_006409	-1.355	0.0318966	0.367624	Abcg5
FAW_016479	-0.668286	0.0319314	0.367624	Pu
FAW_017028	1.09607	0.0319793	0.367624	PGGT1B
FAW_001860	1.56614	0.0320097	0.367624	--
FAW_023214	-1.96261	0.0320146	0.367624	--
FAW_018365	10.6499	0.0321796	1	PEBP1
FAW_013099	-0.819954	0.0323035	0.369008	ADSL
FAW_013012	-3.90525	0.0323302	0.369008	--
FAW_019136	-1.47162	0.0327402	0.372746	--
FAW_003209	-0.638931	0.0327904	0.372746	PGD
FAW_017441	-0.597764	0.0328152	0.372746	asp
FAW_009804	-1.10726	0.0329594	0.373935	Lct
FAW_020032	6.69116	0.0331046	1	XDH
FAW_009570	-9.49185	0.0331514	1	--
FAW_015526	-0.806596	0.0332275	0.376075	--
FAW_005369	0.864522	0.0337457	0.380487	PLA2G6
FAW_012980	-8.29155	0.0337626	1	LCT
FAW_000531	0.963463	0.0337647	0.380487	DHDDS
FAW_007937	-1.81574	0.0338157	0.380487	--
FAW_015486	-0.66497	0.0338189	0.380487	kif4
FAW_016889	-8.11201	0.0338368	1	Eip78C
FAW_018305	1.40404	0.0338586	0.380487	RAB33B
FAW_011532	1.49277	0.0339396	0.380493	bab2
FAW_009282	-1.01372	0.03402	0.380616	--
FAW_012017	2.68636	0.0341453	1	--
FAW_010484	3.19438	0.0342469	1	--
MSTRG.6668	0.724226	0.0345864	0.386371	OCA2
FAW_000958	-11.2005	0.0346037	1	EbpIII
FAW_014555	-0.817916	0.0347761	0.388032	SLC26A11
FAW_003115	-1.15398	0.0349743	0.389785	--
FAW_018240	-9.17991	0.03498	1	clvs1
FAW_006793	-1.79723	0.0350193	0.389827	GST1
FAW_007344	-1.67162	0.0352586	0.390063	PTGR1
FAW_001507	-1.76702	0.0352879	0.390063	--
FAW_006787	8.82443	0.0356002	1	pol
FAW_012880	-1.05507	0.0357799	0.393662	RDL2
FAW_020337	-0.610211	0.0360789	0.396491	fth1-b
FAW_012610	-1.15747	0.0362882	0.39749	FAAH2
FAW_005554	1.26383	0.0362959	0.39749	--
FAW_008961	-1.86394	0.0363721	0.397865	--
FAW_017158	2.77649	0.0365484	1	--
FAW_003570	-0.599525	0.0366056	0.399058	SLC27A4
FAW_012411	-1.10653	0.0366078	0.399058	--
FAW_010172	-1.49412	0.0367765	0.39997	ABAT
FAW_007753	-0.614975	0.0367773	0.39997	AIFM3
FAW_005458	-2.72662	0.0370119	1	BJSP-2
FAW_011278	-0.731744	0.03712	0.402325	Aurka
FAW_007167	0.67074	0.0371964	0.402691	--
FAW_019141	-1.19162	0.0376121	0.405336	Orc6
FAW_020583	-0.874469	0.0378189	0.406274	DNAJC28
FAW_016527	-0.717236	0.0378281	0.406274	fam213b
FAW_012257	0.649518	0.0378718	0.406274	--
FAW_002636	-1.51165	0.0379138	0.406274	FCHSD2
FAW_019000	-1.14795	0.0386435	0.412755	--
FAW_003060	1.3757	0.0387338	0.41319	--
FAW_015893	-8.65583	0.0390593	1	--
FAW_000686	3.32193	0.0391724	1	CHST4
FAW_018090	3.95884	0.0392839	0.417221	Arsb
FAW_003980	-0.769575	0.0394365	0.417921	Mal-A1
FAW_016596	-1.53253	0.0394865	0.417921	--
FAW_022077	-1.57909	0.0396084	0.418742	--
FAW_005326	-0.784295	0.0397355	0.419617	Eip71CD
FAW_009167	8.04075	0.0397624	1	pol
FAW_006928	0.628699	0.0398368	0.419831	ASNS
FAW_020862	1.66297	0.0399421	0.4201	futsch
FAW_005640	-0.893853	0.0399861	0.4201	1a
FAW_018216	-0.768245	0.0400032	0.4201	Slc12a2
FAW_003667	0.603194	0.0401035	0.420206	tim
FAW_006274	-1.66019	0.0401746	0.420206	FucT6
FAW_019443	-1.67018	0.0402367	0.420206	snk
FAW_001151	-0.882571	0.0402745	0.420206	TRIP4
FAW_021895	0.947808	0.0403251	0.420216	--
FAW_017485	9.81911	0.0404348	0.420341	Gld
FAW_008969	-1.03498	0.0404364	0.420341	--
FAW_011829	-1.17132	0.0404704	0.420341	Far1
FAW_017147	0.623329	0.0409347	0.424697	Vps51
FAW_014881	1.10916	0.0409924	0.424831	UGT3A1
FAW_010907	0.798517	0.0415221	0.42893	mth2
FAW_000891	-1.52982	0.0415479	0.42893	--
FAW_017291	-0.617086	0.0415693	0.42893	Vha13
FAW_016621	-1.51717	0.0419393	0.430303	fahd2
FAW_014884	1.03567	0.0419467	0.430303	Ugt2b1
FAW_016374	-9.93664	0.0419621	1	KLKB1
FAW_023264	-1.17785	0.0420763	0.430653	--
FAW_014340	-3.44123	0.0421046	1	--
FAW_005489	-0.638203	0.0423807	0.432585	HACL1
FAW_022000	-1.94245	0.042539	0.433733	--
FAW_019879	-1.56745	0.0425954	0.433771	--
FAW_008218	0.839965	0.0426344	0.433771	--
FAW_012664	-1.1913	0.0429027	0.434926	--
FAW_022657	-1.07702	0.0430237	0.434926	Hmcn2
FAW_014723	-1.03291	0.0434435	0.437669	pyx
FAW_014657	-0.694985	0.0434801	0.437669	CYP6B2
FAW_013139	-0.625199	0.0435352	0.437758	SULT1E1
FAW_016772	1.19232	0.0436744	0.4384	Est-6
FAW_004720	1.6212	0.0437483	0.4384	--
FAW_001533	-0.980844	0.0437844	0.4384	URH2
FAW_010601	1.30893	0.044221	0.44137	--
FAW_008704	-0.776675	0.0443579	0.44227	ovch2
FAW_001856	-1.3744	0.0447454	0.443505	ARG2
FAW_022612	-4.38466	0.044943	1	--
FAW_017923	-1.52655	0.0451606	0.446304	Tret1
MSTRG.8551	-1.06529	0.0452005	0.446304	Cyt-b5-r
FAW_019907	1.21931	0.0453164	0.446304	pol
MSTRG.682	-0.621497	0.0453668	0.446304	Tret1
FAW_002119	0.665148	0.0453756	0.446304	creld2
FAW_022164	1.05958	0.0456695	0.447432	--
FAW_006995	-9.10329	0.0456795	0.447432	Cyp4d2
FAW_002496	1.7666	0.0457938	0.448088	SLC35C2
FAW_020017	-3	0.0459649	1	--
FAW_015615	-2.05938	0.0459867	0.448725	--
MSTRG.10882	-1.47603	0.0460012	0.448725	KLKB1
FAW_008554	-1.07484	0.0460847	0.449048	Cdh23
FAW_018476	-1.23649	0.0461575	0.449048	GPT
FAW_021735	-1.46467	0.0461817	0.449048	modSP
FAW_023021	-0.665846	0.0462936	0.449114	Tret1
FAW_012415	0.615474	0.0463259	0.449114	--
FAW_003593	1.09115	0.0464897	0.450241	pinta
FAW_019135	-0.766367	0.0468542	0.452844	scra
FAW_010376	1.98176	0.0469076	0.452888	X-element\ORF2
FAW_016492	-0.797683	0.0469544	0.452888	Ech1
FAW_020662	-0.926699	0.0474176	0.45596	GIP
MSTRG.4902	-1.11388	0.0476805	0.456981	--
FAW_001649	2.53898	0.047697	0.456981	--
FAW_008349	-0.63193	0.0479788	0.457465	fabG
FAW_020123	1.09228	0.0480706	0.457465	AGAP009593
FAW_020939	-0.881456	0.0481059	0.457465	trip13
FAW_010488	3.05889	0.0481167	1	--
FAW_000911	0.712254	0.0481751	0.457663	--
FAW_006394	-1.82608	0.0483617	0.458959	Hsp68
FAW_000337	-0.612317	0.0484085	0.458959	Mp20
FAW_001624	2.21299	0.0485053	1	Pnlip
FAW_014492	0.794509	0.0485484	0.459824	SWEET9
FAW_012462	0.796095	0.0486101	0.459949	PLAGL2
FAW_002964	-0.808701	0.0486909	0.460199	--
FAW_020962	-0.851416	0.0487338	0.460199	--
FAW_022864	0.898101	0.048834	0.460226	EGT
FAW_010198	-2.62619	0.0490907	0.461661	ASL
FAW_015142	1.74657	0.0492146	0.461661	--
FAW_004338	9.35902	0.049756	1	--

## Sheet: Table S2
Table S2 The list of differently expressed genes in comparison WT vs T2
id	log2(fc)	PValue	FDR	Symbol
FAW_007744	-4.50895	8.40416e-59	8.09152e-55	EURM3
FAW_008315	-5.43504	1.81865e-44	8.755e-41	--
FAW_000712	-5.1922	3.53089e-39	1.13318e-35	--
FAW_005462	-7.3575	7.23933e-38	1.74251e-34	--
FAW_003694	-1.92812	1.7091e-33	3.29103e-30	PMP2
FAW_014619	-6.2619	3.56847e-30	5.7262e-27	Cdh23
FAW_017988	-6.20451	4.51816e-30	6.21441e-27	apolpp
FAW_017989	-6.13129	2.85191e-28	3.43227e-25	ABCG4
FAW_008705	-7.49452	3.26768e-25	3.49569e-22	ATG2B
FAW_020595	-3.13089	9.9603e-23	9.139e-20	--
FAW_009804	-3.94667	1.04413e-22	9.139e-20	--
FAW_016636	-4.90401	2.61588e-21	2.09881e-18	Tmprss9
MSTRG.3709	-2.01674	5.93624e-20	4.39647e-17	--
FAW_004268	-4.55708	1.39964e-19	9.4319e-17	--
FAW_020184	-3.74656	1.46945e-19	9.4319e-17	--
FAW_008537	-2.05204	1.67049e-19	1.00522e-16	Hn
FAW_003134	-2.0633	1.9638e-19	1.1122e-16	--
FAW_005976	-2.09679	2.19107e-19	1.16364e-16	SDR-1
FAW_005857	-1.4794	2.29634e-19	1.16364e-16	SLC26A11
FAW_018286	-0.944793	2.25571e-18	1.0859e-15	Oacyl
FAW_010231	-4.38955	4.3369e-18	1.98837e-15	CG5009
FAW_021360	-1.94132	4.62069e-18	2.02218e-15	ovch2
FAW_000391	-5.9453	5.23858e-18	2.19291e-15	Pdk1
FAW_014554	-2.7755	6.70092e-18	2.68818e-15	4CL2
FAW_012772	-2.13005	1.27459e-17	4.9087e-15	CYP6K1
FAW_005464	-8.79569	1.89636e-17	7.02237e-15	--
FAW_005984	-5.36128	2.02965e-17	7.23758e-15	--
FAW_016554	-0.891774	2.31822e-17	7.97135e-15	--
FAW_011201	-1.76814	4.61881e-17	1.53344e-14	--
FAW_001942	-1.52661	5.81069e-17	1.86484e-14	pol
FAW_002122	-0.960976	9.93547e-17	3.08577e-14	PGRP-LB
FAW_009381	-2.73682	1.72328e-16	5.18493e-14	--
FAW_000862	-1.85299	2.32132e-16	6.77263e-14	Abd-B
FAW_007794	-2.47851	3.19081e-16	9.03562e-14	Lct
FAW_006628	-4.80834	4.58021e-16	1.25995e-13	SLC25A29
MSTRG.15377	3.69496	8.47294e-16	2.26604e-13	TRYP1
FAW_004267	-1.84451	2.0134e-15	5.23919e-13	--
FAW_003358	-3.39498	2.68042e-15	6.79134e-13	Rasa1
FAW_017673	-2.55005	2.9943e-15	7.39209e-13	HPGD
FAW_008193	-1.25415	4.48662e-15	1.07993e-12	4CL3
FAW_012973	-5.28222	4.94241e-15	1.16062e-12	pnbA
FAW_009800	-4.04898	1.32988e-14	3.04858e-12	Cyt-b5-r
FAW_018490	-1.78129	1.38346e-14	3.09767e-12	l(3)mbn
FAW_019650	-3.4392	5.36887e-14	1.17481e-11	--
FAW_010366	-5.26162	5.98994e-14	1.28158e-11	Tmprss2
FAW_015271	-0.880125	2.93516e-13	6.14341e-11	yxbG
MSTRG.7640	-1.71184	3.38767e-13	6.93968e-11	PXMP2
FAW_005974	-5.96021	4.50612e-13	9.03854e-11	DDO
FAW_009642	-3.35581	4.96674e-13	9.75913e-11	cuta
FAW_003718	1.74674	5.46639e-13	1.04406e-10	Cda
FAW_008704	-3.27153	5.53045e-13	1.04406e-10	SERPINB4
FAW_000396	-1.20774	5.65876e-13	1.04774e-10	Miox
FAW_018060	-12.6416	6.16146e-13	1.11929e-10	nas-1
FAW_017990	-5.81436	7.72525e-13	1.37738e-10	Mal-B1
FAW_011275	-2.01463	9.31647e-13	1.63089e-10	--
FAW_001116	-4.18114	2.53513e-12	4.31003e-10	TRYP2
FAW_004661	-1.90199	2.55164e-12	4.31003e-10	Tret1
FAW_012610	-3.48177	2.62282e-12	4.35388e-10	foi
FAW_008589	1.5027	2.84501e-12	4.58167e-10	--
FAW_005055	-3.08404	2.85522e-12	4.58167e-10	CFDP2
FAW_020809	-3.27642	3.47655e-12	5.48724e-10	Tret1
FAW_015790	-1.5825	5.05385e-12	7.84814e-10	HMT-1
FAW_007280	-0.775557	5.4962e-12	8.39959e-10	MFSD10
FAW_012049	-2.66029	1.23335e-11	1.85542e-09	deltaTry
FAW_016359	2.85835	3.4335e-11	5.00875e-09	GALK1
FAW_023261	-3.1382	5.65721e-11	8.12949e-09	Ald
FAW_021982	-1.51724	6.27243e-11	8.88102e-09	--
FAW_001665	-2.97728	6.65101e-11	9.28056e-09	--
FAW_007882	1.95289	6.8435e-11	9.41274e-09	BAIAP2
FAW_012065	-0.612443	7.53569e-11	1.02188e-08	SERPINB14B
FAW_000268	-6.64876	8.2995e-11	1.10983e-08	--
FAW_015859	-0.619171	1.16033e-10	1.53036e-08	LCT
FAW_011446	-12.8037	1.33535e-10	1.7374e-08	HR38
FAW_010445	-2.95584	1.99129e-10	2.55629e-08	CYP4C1
FAW_019199	-2.44105	2.16523e-10	2.74301e-08	pol
FAW_022727	-2.886	2.36368e-10	2.95553e-08	Slc22a1
FAW_014657	-1.69971	2.48975e-10	3.07325e-08	CFDP2
FAW_009247	-1.37752	2.7933e-10	3.37256e-08	MINPP1
FAW_001443	-4.67596	2.8023e-10	3.37256e-08	--
FAW_017603	-2.48085	3.09169e-10	3.67491e-08	qua
MSTRG.8135	-0.69483	3.15483e-10	3.70423e-08	Tret1
FAW_004757	-4.37045	3.8309e-10	4.44384e-08	DOK7
FAW_005855	-1.19275	3.8788e-10	4.44584e-08	Lsd-2
FAW_003939	3.28716	4.93283e-10	5.58744e-08	Ca7
FAW_009532	2.82795	5.5001e-10	6.15756e-08	AGRN
FAW_008256	-2.24247	5.83634e-10	6.45888e-08	TMPRSS15
FAW_015717	-1.01626	6.72304e-10	7.35562e-08	AGAP009593
FAW_003654	-0.704104	8.02631e-10	8.68285e-08	LEB4
MSTRG.15715	-3.59328	8.50466e-10	9.0981e-08	--
FAW_009078	-3.81171	9.02292e-10	9.54644e-08	PIK3CD
FAW_006701	-4.08438	9.36195e-10	9.79748e-08	MINPP1
FAW_017688	-0.761676	1.07251e-09	1.11034e-07	CG32751
FAW_005640	-1.90387	1.41117e-09	1.40844e-07	TRYP1
FAW_006445	-3.48973	1.41897e-09	1.40844e-07	DHRS4
FAW_016584	-1.77379	2.14171e-09	2.08287e-07	--
MSTRG.8453	2.48194	2.6253e-09	2.52764e-07	--
MSTRG.15462	-1.18538	3.37217e-09	3.21458e-07	PEX11A
FAW_021463	-0.709742	4.07452e-09	3.84603e-07	PNLIP
FAW_016478	-3.11449	4.32977e-09	4.04729e-07	Proc
FAW_016020	-3.0702	4.851e-09	4.49091e-07	pol
FAW_007109	-4.43815	5.23803e-09	4.80302e-07	mrm3
FAW_011125	-2.23239	5.32086e-09	4.83294e-07	GK3P
FAW_011415	-3.04982	5.57152e-09	5.01333e-07	CYP6B2
FAW_001126	-1.05665	5.94575e-09	5.30053e-07	Lip1
FAW_004560	1.94322	6.12694e-09	5.41195e-07	Nlgn2
FAW_011319	-2.23839	7.07931e-09	6.19633e-07	MFB1
FAW_021888	4.59643	1.06641e-08	9.24987e-07	GST1
FAW_013097	-0.592772	1.17574e-08	1.01072e-06	Xpc
FAW_016595	-2.15813	1.24503e-08	1.06081e-06	ABCG4
FAW_005854	-1.05563	1.36402e-08	1.152e-06	FAAH2
FAW_016559	-0.587254	1.38655e-08	1.16085e-06	--
FAW_003958	-1.72925	1.60454e-08	1.33176e-06	--
FAW_007769	-1.84736	1.83009e-08	1.50599e-06	FucT6
FAW_016479	-1.52831	1.84583e-08	1.50607e-06	CYP6L1
FAW_003083	-1.0497	1.90188e-08	1.53876e-06	ubq-1
FAW_004684	-1.58219	1.9249e-08	1.54441e-06	nudL
FAW_003408	-1.66603	1.99921e-08	1.59077e-06	--
FAW_015943	1.74962	2.20182e-08	1.73763e-06	ALDH1B1
FAW_004756	-4.41763	2.22753e-08	1.74363e-06	Tre1
FAW_005848	-3.60828	2.2836e-08	1.77311e-06	HK2
FAW_006449	-1.62609	2.50366e-08	1.92842e-06	--
FAW_018487	-0.881861	2.58868e-08	1.97808e-06	epsilonTry
FAW_000555	-3.36725	2.6153e-08	1.98268e-06	Gldc
FAW_003757	-2.9349	3.94185e-08	2.96501e-06	cN-IIIB
FAW_008965	-7.00225	4.09234e-08	3.05434e-06	--
FAW_013030	-2.28962	4.35286e-08	3.22379e-06	CHIA
FAW_011336	-2.41143	4.85481e-08	3.5508e-06	Slc25a17
FAW_014645	2.44071	4.86815e-08	3.5508e-06	Aspg
FAW_014581	2.32017	4.99199e-08	3.61375e-06	--
FAW_017953	-3.8511	5.11012e-08	3.67166e-06	ALDH1A1
FAW_011123	-1.58743	5.73015e-08	4.08666e-06	--
FAW_008142	-1.13222	6.54305e-08	4.6321e-06	Prss21
FAW_012794	-5.55612	6.88842e-08	4.841e-06	Jupiter
FAW_002248	1.4239	8.16873e-08	5.65674e-06	RGN
FAW_004744	-1.97014	8.22543e-08	5.65674e-06	Pgk
FAW_005849	-2.53154	8.6584e-08	5.91227e-06	--
FAW_012016	-1.44861	9.19597e-08	6.2155e-06	ACOX3
FAW_015319	-6.82214	9.26826e-08	6.2155e-06	AAEL003512
FAW_019070	-0.925469	9.29613e-08	6.2155e-06	--
FAW_014382	-2.87445	9.43645e-08	6.2658e-06	CG5009
FAW_005970	-4.94251	1.06238e-07	7.00589e-06	--
FAW_013099	-1.7742	1.08017e-07	7.07474e-06	SLC18B1
FAW_016946	2.89005	1.11051e-07	7.22434e-06	PTPN23
FAW_020337	-1.12764	1.15313e-07	7.44053e-06	--
FAW_020867	-3.0993	1.1592e-07	7.44053e-06	Rabgef1
FAW_005951	-3.19936	1.20291e-07	7.66996e-06	GDPD6
FAW_012409	3.17414	1.44202e-07	9.13407e-06	Hsd17b4
FAW_015754	-3.26192	1.62354e-07	1.01148e-05	--
FAW_012346	-1.88368	1.62837e-07	1.01148e-05	TRYP1
FAW_003565	-1.08514	1.69589e-07	1.04667e-05	RDH12
FAW_014969	-2.30411	1.78688e-07	1.0958e-05	Phlpp
FAW_012153	2.22129	1.82634e-07	1.11291e-05	Orct
FAW_005313	1.15417	2.03423e-07	1.2318e-05	plekha7
FAW_023224	-2.69246	2.08292e-07	1.2534e-05	SLC27A4
FAW_004437	-0.719976	2.36945e-07	1.40631e-05	Spn88Ea
FAW_012998	-2.83311	2.37509e-07	1.40631e-05	--
FAW_001820	-1.21616	2.38085e-07	1.40631e-05	feh-1
FAW_001063	-1.13341	2.48246e-07	1.45739e-05	foi
FAW_011221	-1.76815	2.6014e-07	1.51796e-05	NPY2R
FAW_009733	-1.30151	2.72179e-07	1.57864e-05	Sv2c
FAW_011128	-1.93557	2.88478e-07	1.66315e-05	CNDP2
FAW_014596	-1.27857	2.94059e-07	1.68524e-05	CG8745
FAW_014540	-0.901397	2.97146e-07	1.69285e-05	bark
FAW_005979	-5.08658	3.02634e-07	1.71398e-05	CYP6K1
FAW_002015	-1.14578	3.77481e-07	2.12116e-05	ImpL3
FAW_000542	3.81853	3.79827e-07	2.12116e-05	CYP4C1
FAW_006795	-1.06095	3.81139e-07	2.12116e-05	--
FAW_000376	-1.45328	3.96819e-07	2.18319e-05	AIG1
FAW_004761	-1.82072	4.1281e-07	2.25826e-05	PEX11G
FAW_012976	-2.49849	4.19452e-07	2.28163e-05	slc16a12
FAW_015017	-2.05085	4.36309e-07	2.35999e-05	CCDC12
FAW_019149	3.54844	4.70328e-07	2.51573e-05	--
FAW_013049	-2.38959	4.74623e-07	2.52468e-05	adt-1
FAW_018160	-2.38226	4.84745e-07	2.56435e-05	UGT2A1
FAW_017500	-1.98268	5.20815e-07	2.74011e-05	--
FAW_012706	-1.43389	5.27375e-07	2.75955e-05	TM7SF3
FAW_002197	-0.866742	5.77908e-07	3.00762e-05	CG32795
FAW_021560	-1.10092	6.32102e-07	3.25448e-05	--
FAW_004660	-3.19979	6.52934e-07	3.32765e-05	IQSEC1
FAW_009431	-3.52811	6.53225e-07	3.32765e-05	RAP2A
FAW_018911	-2.32382	6.64491e-07	3.36722e-05	--
FAW_018696	-7.1116	6.74104e-07	3.39805e-05	Fasn
FAW_003209	-1.58874	6.81571e-07	3.40431e-05	Oat
FAW_020338	-1.12916	7.00278e-07	3.4754e-05	Est-6
MSTRG.11561	-1.53723	7.08602e-07	3.49868e-05	--
FAW_000767	-1.88388	7.1813e-07	3.52763e-05	CTRL
FAW_001676	1.43428	7.39213e-07	3.61276e-05	Spn77Ba
FAW_021302	-1.94028	8.39937e-07	4.06326e-05	--
FAW_009370	-1.53308	8.44052e-07	4.06326e-05	pol
FAW_020582	-1.77338	8.52788e-07	4.0849e-05	SCP2
FAW_011634	-0.701287	8.57578e-07	4.08751e-05	art-1
FAW_016801	-1.71503	8.80314e-07	4.1752e-05	Atl2
FAW_019297	-2.80334	9.369e-07	4.40076e-05	akr2e
FAW_012611	-1.46768	9.37012e-07	4.40076e-05	Slc22a1
FAW_005197	-2.63782	9.53595e-07	4.4569e-05	--
FAW_020638	-3.11397	1.02183e-06	4.74251e-05	--
FAW_000580	1.82832	1.02456e-06	4.74251e-05	Gpdh
FAW_011192	1.78121	1.05397e-06	4.85534e-05	--
FAW_001926	3.37021	1.14784e-06	5.26257e-05	Pgm
FAW_003370	1.50305	1.15727e-06	5.28067e-05	2021-09-01
FAW_002121	-0.827151	1.18441e-06	5.36639e-05	--
FAW_008538	-1.17767	1.1872e-06	5.36639e-05	--
FAW_017494	-2.85912	1.19464e-06	5.37476e-05	--
FAW_000057	-1.11247	1.20214e-06	5.38336e-05	--
FAW_007793	-2.88672	1.23596e-06	5.50919e-05	PDE7A
FAW_021985	-0.930201	1.29532e-06	5.74716e-05	apbb1ip
FAW_017951	-3.75822	1.36233e-06	6.01676e-05	FERH
FAW_001657	-0.740505	1.50964e-06	6.60674e-05	EbpIII
FAW_020572	1.49874	1.51956e-06	6.62005e-05	n4bp3-b
FAW_004902	-3.60666	1.65206e-06	7.16489e-05	--
FAW_008218	2.05641	1.74396e-06	7.52952e-05	Pqlc3
FAW_005656	-1.11085	1.81819e-06	7.81496e-05	PZP
FAW_021501	-1.92754	1.8334e-06	7.8453e-05	Papss1
FAW_021552	-2.01385	1.85021e-06	7.88221e-05	--
FAW_018458	1.31455	1.90501e-06	8.07992e-05	--
FAW_004755	-1.42259	1.93585e-06	8.17474e-05	--
FAW_006670	-4.49769	1.94484e-06	8.17682e-05	--
FAW_008507	2.76219	1.97029e-06	8.24376e-05	EbpIII
FAW_008727	1.73125	1.98035e-06	8.24376e-05	Akr1b1
FAW_008419	-3.31117	1.98935e-06	8.24376e-05	UGT2B13
FAW_017803	1.61601	2.00922e-06	8.26699e-05	cora
FAW_019950	1.78428	2.04428e-06	8.34463e-05	ALDH1A1
FAW_023205	-1.42291	2.05008e-06	8.34463e-05	GPAM
FAW_004905	-3.59018	2.05409e-06	8.34463e-05	Xylb
FAW_009653	-1.70022	2.08761e-06	8.44515e-05	ush
FAW_003295	-0.776074	2.11994e-06	8.54009e-05	DAAM2
FAW_021796	-1.02521	2.19834e-06	8.819e-05	tmem198
FAW_000658	-2.77639	2.26457e-06	9.047e-05	GBE1
MSTRG.15716	-2.90969	2.28606e-06	9.09512e-05	Tret1
FAW_012075	-0.590942	2.37035e-06	9.39166e-05	--
FAW_008679	-1.87738	2.56111e-06	0.000100564	Ance
FAW_020868	-3.31904	2.56947e-06	0.000100564	Cat
FAW_000224	-4.43123	2.63765e-06	0.000102643	--
FAW_019943	-4.60995	2.64391e-06	0.000102643	LAC21
FAW_006394	-3.32309	2.66581e-06	0.000103078	SCD5
FAW_020955	-4.89515	2.75422e-06	0.00010607	Aldh3a2
FAW_008479	-1.663	2.84278e-06	0.000109045	--
FAW_003570	-1.29405	2.86925e-06	0.000109624	Tret1
FAW_019704	2.90758	2.88373e-06	0.000109741	--
FAW_003935	-4.8623	2.91029e-06	0.000110316	SULT1E1
FAW_019619	-1.68607	3.05154e-06	0.000115217	Pka-C1
FAW_011126	-3.85945	3.26378e-06	0.000122749	--
FAW_010971	-1.12617	3.31928e-06	0.000123868	CNGB1
FAW_004672	-1.47153	3.3494e-06	0.00012451	--
FAW_009684	1.94884	3.36631e-06	0.000124657	GNB1L
FAW_020700	-2.69885	3.69461e-06	0.00013629	Myrf
FAW_016250	-2.07909	3.73295e-06	0.000137179	hacd3
FAW_004662	-2.43532	4.07467e-06	0.000148602	--
FAW_005366	1.84692	4.15753e-06	0.000151052	MKNK2
FAW_009995	-2.01452	4.28253e-06	0.000154731	trx
FAW_014621	-2.95582	4.29094e-06	0.000154731	Alp-m
MSTRG.823	-2.8999	4.34578e-06	0.000156124	Cel
FAW_005736	6.77698	4.67217e-06	0.000165462	--
FAW_019150	1.76466	4.67445e-06	0.000165462	GstZ1
FAW_018085	-2.77453	4.69871e-06	0.000165711	Tret1
FAW_003022	-1.38965	4.8258e-06	0.000169314	PHYH
FAW_015235	-1.92862	4.83603e-06	0.000169314	DPP4
FAW_005977	-2.17865	4.86492e-06	0.000169708	--
FAW_012804	-0.704967	4.98627e-06	0.00017228	fln
FAW_008594	-2.48862	4.99232e-06	0.00017228	Atl2
FAW_001562	-3.04495	5.01982e-06	0.00017261	SLC10A2
FAW_016225	-1.36342	5.21566e-06	0.000178696	MYO18A
FAW_004413	-1.03508	5.23392e-06	0.000178696	--
FAW_004530	-4.72704	5.36888e-06	0.000182656	--
FAW_022664	-1.89694	5.57172e-06	0.000188226	LCT
FAW_018476	-4.30142	5.74974e-06	0.000193561	MDC1
FAW_000760	1.40214	5.97672e-06	0.000200501	atl
FAW_001786	-1.81207	6.0358e-06	0.00020178	--
FAW_018299	1.73037	6.19938e-06	0.000206532	AGAP009593
FAW_014920	1.6509	6.34972e-06	0.000210811	SERP1785
FAW_002631	1.47872	6.66729e-06	0.000220593	FUCA1
FAW_022101	-4.3158	6.97538e-06	0.000229996	ACAA2
FAW_003945	-0.848669	7.14484e-06	0.00023478	TREX1
FAW_017258	-2.36847	7.5521e-06	0.000245647	5NUC
FAW_018474	-1.28469	8.35332e-06	0.000270794	FAS1
FAW_019296	-3.00328	8.46344e-06	0.000273443	CADM3
FAW_012408	3.10143	8.97851e-06	0.00028815	CD63
FAW_016998	-1.08476	9.10601e-06	0.000291271	--
FAW_000226	-1.77011	9.23884e-06	0.000294542	--
FAW_005759	-3.40927	9.39747e-06	0.00029861	clvs1
FAW_012761	4.36302	9.97584e-06	0.000315393	moody
FAW_007847	-2.25835	9.99116e-06	0.000315393	HACL1
FAW_010263	-0.699483	1.01684e-05	0.00031994	--
FAW_022816	-0.970092	1.17064e-05	0.000365591	--
FAW_011946	1.61876	1.17332e-05	0.000365591	--
FAW_019628	2.16781	1.20109e-05	0.000372332	ADH5
FAW_011944	-0.894948	1.20269e-05	0.000372332	sup-9
FAW_015544	2.40532	1.21187e-05	0.000373969	wat
FAW_018091	-1.93901	1.25526e-05	0.000384894	betaTry
FAW_016029	-2.84842	1.33225e-05	0.000407202	STARD10
FAW_006722	-3.06454	1.36464e-05	0.000413657	--
MSTRG.12051	2.62817	1.36591e-05	0.000413657	CPB1
FAW_015605	-1.28572	1.36626e-05	0.000413657	Pu
FAW_004129	-0.8868	1.38697e-05	0.000418367	Ache
FAW_016517	-0.638014	1.39113e-05	0.000418367	DHCR24
FAW_018196	1.57813	1.39485e-05	0.000418367	Eip78C
FAW_006376	1.69403	1.48113e-05	0.000442023	kug
FAW_005957	-0.992207	1.4829e-05	0.000442023	HLF
FAW_004754	-3.72535	1.48889e-05	0.00044244	Tkfc
FAW_003594	-0.594182	1.49653e-05	0.000443342	--
FAW_012877	1.35975	1.50787e-05	0.000445332	Cad96Ca
FAW_017443	-2.26091	1.57976e-05	0.000465136	preA
FAW_007863	-1.29422	1.60696e-05	0.000471702	--
FAW_015234	-2.49693	1.664e-05	0.000486546	Pfk
FAW_008789	-0.649538	1.66764e-05	0.000486546	SDR16C5
FAW_009853	-1.99691	1.74524e-05	0.000507649	Sb
FAW_005489	-1.80874	1.78766e-05	0.000515826	Ald
FAW_000285	-2.61236	1.79395e-05	0.000515826	PGD
FAW_010258	3.58307	1.79478e-05	0.000515826	l(2)efl
FAW_002039	-0.866317	1.8075e-05	0.000517235	Aldh1a7
FAW_001731	-1.98498	1.81304e-05	0.000517235	C38C10.2
FAW_005772	-0.85421	1.8158e-05	0.000517235	JHEH
FAW_012712	-1.14741	1.84919e-05	0.000525192	Alp-m
FAW_007097	1.52634	1.87014e-05	0.000529111	Unc5b
FAW_021150	-1.28354	1.87398e-05	0.000529111	--
FAW_001123	-1.03685	1.95635e-05	0.000550752	TGM1
FAW_016623	1.31202	1.9674e-05	0.000552247	--
FAW_017643	1.47485	2.03685e-05	0.000570081	Orct
FAW_002052	-0.695399	2.09382e-05	0.000582637	--
FAW_005085	-3.69261	2.26345e-05	0.000628026	sno1
FAW_010536	1.49666	2.27509e-05	0.000629442	--
FAW_010014	-2.01047	2.36955e-05	0.000653697	RE1
FAW_013031	-3.41399	2.38004e-05	0.000654715	pol
FAW_004561	-0.949629	2.409e-05	0.000660794	4cl2
FAW_011389	-1.17253	2.45621e-05	0.00067183	ABCG4
FAW_020274	1.52972	2.59562e-05	0.000707951	yrbE
FAW_008603	3.1174	2.65802e-05	0.00072292	SASH1
FAW_012697	2.36813	2.71421e-05	0.000736124	Scpep1
FAW_010304	3.18905	2.72766e-05	0.000737695	Pgi
FAW_007630	-4.23437	2.73657e-05	0.000738031	LMO7
FAW_000158	-0.60724	2.76263e-05	0.000742978	ea
FAW_009471	1.13685	2.79558e-05	0.000749746	PyK
FAW_023242	-0.95322	2.9429e-05	0.000785624	--
FAW_003235	-0.963038	2.94568e-05	0.000785624	Slc26a5
FAW_011439	2.1881	2.97718e-05	0.00079183	--
FAW_003159	-2.85609	3.02834e-05	0.00080322	Fam214a
FAW_010959	1.94164	3.46333e-05	0.000911065	--
FAW_012996	-3.53549	3.51792e-05	0.000922904	ROBO1
FAW_001758	-2.12683	3.65999e-05	0.000957565	MDH2
FAW_005506	1.97116	3.68808e-05	0.000962299	ACY1
FAW_012855	-1.07838	3.74899e-05	0.000972919	GlyP
FAW_022561	2.10452	3.86433e-05	0.00100015	--
FAW_005118	1.26231	3.87861e-05	0.00100116	CYP4C1
FAW_018891	1.79054	3.96837e-05	0.00101975	RPS6KC1
FAW_018073	1.76721	3.97182e-05	0.00101975	pol
FAW_000829	-3.77827	4.0053e-05	0.00102561	Lipc
FAW_018318	-0.983216	4.02478e-05	0.00102787	crq
FAW_010907	2.82726	4.11609e-05	0.0010484	KLKB1
FAW_019353	-0.81984	4.14526e-05	0.00105167	D11DS
FAW_019477	-2.28951	4.18639e-05	0.00105792	EGT
FAW_002961	-0.931369	4.23384e-05	0.00106432	SEMA-1A
FAW_001298	-3.88774	4.27115e-05	0.0010709	CarT
FAW_004585	-3.23494	4.33056e-05	0.00108298	fabG
FAW_010593	2.28935	4.56187e-05	0.00113787	Abcg5
FAW_004386	-4.32612	4.59337e-05	0.00114276	Tmprss15
FAW_001084	-2.03705	4.60979e-05	0.00114389	--
FAW_016659	-2.85634	4.69152e-05	0.0011582	Gld
FAW_002928	2.15169	4.74895e-05	0.00116715	crispld2
FAW_007567	2.18395	4.75674e-05	0.00116715	--
FAW_009813	-4.63421	4.76414e-05	0.00116715	SMG1
FAW_009654	-2.72807	4.80752e-05	0.00117479	Got2
FAW_000510	-9.55075	4.90882e-05	1	Gapdh
FAW_017058	1.72738	4.9713e-05	0.00121174	ache
FAW_010990	-1.29358	5.00033e-05	0.00121574	OTUD7B
FAW_017562	-0.924919	5.03502e-05	0.00122109	Tmprss9
FAW_001901	-1.2548	5.08977e-05	0.00123126	mth2
FAW_001658	-1.15457	5.12424e-05	0.0012365	hacd3
FAW_015166	1.68795	5.20492e-05	0.0012497	UGP2
FAW_003084	2.68728	5.22472e-05	0.00125133	pol
MSTRG.3653	-3.52202	5.32433e-05	0.00127203	CDC20
FAW_001899	1.77979	5.47384e-05	0.00130451	SLC31A1
MSTRG.12965	-1.60795	5.58918e-05	0.00132871	Nmdar1
FAW_012997	-2.33444	5.60568e-05	0.00132935	AKR1B1
FAW_011628	1.87494	5.6246e-05	0.00133056	--
FAW_004830	-1.66137	5.7744e-05	0.00136234	dar1
FAW_015236	-2.79315	5.80556e-05	0.00136331	Stox1
FAW_006392	1.18413	5.87166e-05	0.00137214	Dyrk2
FAW_007221	1.82823	5.91284e-05	0.00137842	AGAP009593
FAW_003490	-0.725877	5.99833e-05	0.00139497	GSTT2B
FAW_007586	-3.70571	6.04337e-05	0.00140206	Mcm8
FAW_008476	-2.40789	6.30037e-05	0.00145817	--
FAW_004952	-0.709537	6.35476e-05	0.00146723	X-element\ORF2
FAW_021556	-2.8218	6.45588e-05	0.00148701	Prps1
FAW_005326	-2.10162	6.49167e-05	0.00149169	CECB
FAW_009432	-2.69804	6.63095e-05	0.00152007	GPT
FAW_016527	-0.782199	6.74436e-05	0.00154239	Eno
FAW_001243	-1.41814	6.80243e-05	0.00155199	--
FAW_016245	-0.881426	6.83828e-05	0.0015537	LRCH1
FAW_003136	3.00701	6.84222e-05	0.0015537	Aldh1b1
FAW_000592	1.46321	6.89336e-05	0.00156163	--
FAW_011497	-5.21662	6.98641e-05	0.00157899	Amy35
FAW_018195	1.49728	7.04068e-05	0.00158382	SULT1C4
FAW_002552	-1.36384	7.21742e-05	0.0016198	--
FAW_015097	1.53639	7.27187e-05	0.00162822	Cyt-b5
FAW_005982	-3.1153	7.29512e-05	0.00162964	X-element\ORF2
FAW_019542	-1.89373	7.54583e-05	0.00168174	--
FAW_012439	-5.32643	7.57272e-05	0.00168384	--
FAW_005249	-1.61106	7.64488e-05	0.00169597	--
FAW_015891	2.4943	7.69533e-05	0.00170323	ADSL
FAW_003360	-3.08746	7.75456e-05	0.00171241	--
FAW_018450	-1.79242	7.86959e-05	0.00173383	ABCG2
FAW_004594	1.79954	7.92753e-05	0.00174261	clvs2
FAW_001094	-2.18031	9.00079e-05	0.00196954	Jon99Cii
FAW_021405	-1.21761	9.17628e-05	0.00200338	pinta
FAW_017194	-3.90889	9.3278e-05	0.00203186	AGAP009593
FAW_001031	1.44578	9.38715e-05	0.00204017	meigo
FAW_010016	-1.13508	9.65378e-05	0.00209339	pnbA
FAW_020866	-3.24134	9.70975e-05	0.0021008	--
FAW_003447	-0.785665	9.81284e-05	0.00211834	Gld
FAW_003112	-0.902047	9.8483e-05	0.00212124	plxna3
FAW_022338	-0.762252	0.000100869	0.00216779	--
FAW_012314	-0.627796	0.000102227	0.00219208	Eepd1
FAW_007664	-1.06361	0.000103819	0.00222127	shg
FAW_000192	2.1748	0.000105078	0.00224101	LPCAT
FAW_011996	2.94644	0.000105207	0.00224101	--
FAW_018773	2.11877	0.000107422	0.00228313	Tango2
MSTRG.4169	-11.9932	0.000110624	1	--
FAW_005056	-0.873239	0.000112174	0.00237364	CTH
FAW_003837	-2.16965	0.000114071	0.0024085	ndel1-b
FAW_005072	1.13541	0.000118091	0.00248792	SVIL
MSTRG.8235	1.50702	0.000118795	0.00249729	CFDP2
FAW_000801	-0.680865	0.000120043	0.00251803	B1
FAW_008702	-1.27443	0.000123402	0.00258143	Tpi
FAW_017035	-2.74331	0.000123602	0.00258143	Toll-7
FAW_021061	-0.742091	0.000124976	0.00259885	phy-2
FAW_017555	1.44922	0.000126057	0.00261569	LCTL
FAW_006832	1.29085	0.000127257	0.00263491	--
FAW_001856	-2.28129	0.000129869	0.00267175	RDH11
FAW_012388	1.68724	0.000130953	0.0026883	tim
MSTRG.8551	-2.25539	0.00013157	0.00269522	slc5a8
FAW_021690	1.78364	0.000132035	0.00269901	sca
FAW_001887	2.1045	0.000135319	0.00276027	Caskin1
FAW_017765	2.90406	0.000137547	0.00279979	Eip71CD
FAW_007502	1.26544	0.000140326	0.00285033	--
FAW_008833	-2.36129	0.000143255	0.00290371	GBA
FAW_020165	-1.26331	0.000144921	0.0029313	--
FAW_018043	1.79815	0.000147443	0.00296364	Mal-A1
FAW_010100	-0.878659	0.000148184	0.00297233	SSR3
FAW_018383	-1.45861	0.000148899	0.00297428	PNLIP
FAW_000411	-2.85777	0.00015037	0.00299745	PGAM1
FAW_017495	-2.84396	0.000152098	0.00302563	Tret1
FAW_006862	-3.64716	0.000152671	0.00303076	Pxk
FAW_017577	-0.888475	0.0001548	0.0030667	--
FAW_018582	-1.12221	0.00015529	0.00307008	ECE1
FAW_021910	2.24394	0.000156665	0.00309092	--
FAW_001794	1.34726	0.000160699	0.00316404	betaTub60D
FAW_002081	1.7715	0.000164416	0.00322403	SLC22A16
FAW_004828	-1.00316	0.00016742	0.00327626	--
FAW_004926	-0.704743	0.000168844	0.00329075	--
FAW_005458	-8.85591	0.00016977	1	ninaB
FAW_020939	-1.08414	0.000170673	0.00331559	SLC27A1
FAW_011416	-1.33528	0.000170807	0.00331559	Cela1
FAW_002038	1.50085	0.000173085	0.00335305	--
FAW_006022	-2.03144	0.000173601	0.00335629	Cbr3
FAW_022929	-1.24141	0.000174559	0.00336805	--
FAW_013232	-3.28286	0.00017599	0.00338886	--
FAW_004458	-0.734949	0.000178968	0.00343934	Scd1
FAW_019773	-1.41211	0.000187848	0.00356795	GOT1
FAW_004976	1.61033	0.000187885	0.00356795	RGN
FAW_003920	-1.66507	0.000189914	0.00358887	Spn77Ba
FAW_005212	-2.62803	0.000190406	0.00358887	PIK3AP1
FAW_011131	-2.59148	0.000190742	0.00358887	Lip1
FAW_017291	-1.25004	0.000190841	0.00358887	ABCC4
FAW_004853	-2.14664	0.00019085	0.00358887	ABCD3
FAW_016500	1.20949	0.000193219	0.00361359	ACSF2
FAW_021433	-0.660417	0.000193479	0.00361359	hpxW
FAW_009577	-1.69255	0.000193665	0.00361359	conu
FAW_016254	-1.37501	0.000194228	0.00361708	GstD7
FAW_007693	-0.634611	0.000195738	0.00363815	HSP90B1
FAW_009052	-0.724772	0.000196124	0.0036383	Dgat1
FAW_001715	-1.05438	0.000200932	0.00372033	ada2
FAW_001279	-1.39237	0.000201548	0.00372457	fabG
FAW_008926	-1.15322	0.000203145	0.00374689	pdhb-1
FAW_019269	-0.914312	0.000208624	0.00383721	Kctd3
FAW_016102	-3.723	0.000208838	0.00383721	fdl
FAW_002893	-2.85991	0.000212389	0.00389502	Gnpda1
FAW_016028	-2.92395	0.000212988	0.00389858	Cyp6g2
FAW_008620	1.42195	0.000213919	0.00390426	path
FAW_020302	1.56726	0.00021411	0.00390426	1a
FAW_007834	-0.857546	0.000219013	0.0039786	Ppt1
FAW_022938	1.85189	0.00022071	0.00400188	GADD45A
FAW_004641	1.17825	0.000221341	0.00400578	CEL
FAW_016221	-5.07682	0.000221963	0.00400949	mib1
FAW_004640	1.20656	0.000226264	0.00406328	CG4968
FAW_004535	-0.969648	0.00022661	0.00406328	Orct
FAW_015437	1.61564	0.000226629	0.00406328	Tpcn1
FAW_012876	-0.636604	0.000231524	0.00414057	CASP2
FAW_006850	5.34873	0.000232109	0.00414057	Hsp70Ba
MSTRG.16703	2.16065	0.00023223	0.00414057	--
FAW_017105	-2.78187	0.000232827	0.00414355	FDPS
MSTRG.5851	-1.93052	0.000237132	0.00420461	SULT1C4
FAW_001086	-2.11863	0.000243802	0.00430701	--
FAW_017499	-1.34918	0.000247912	0.00434849	Toll-7
MSTRG.13848	-1.0975	0.000248234	0.00434849	pif1
FAW_008691	4.83345	0.000248408	0.00434849	--
FAW_001075	-3.0246	0.000249966	0.00436783	Gas2
FAW_007525	-11.6618	0.00025022	1	Gata4
FAW_001622	-0.597135	0.000251861	0.00439298	--
FAW_010084	1.58569	0.000253246	0.00440913	Cela2a
FAW_005776	1.36125	0.000253831	0.00441134	PLEKHG1
FAW_011218	-1.01454	0.000255932	0.00443985	cdk14
FAW_007890	-1.85078	0.00025711	0.00445225	ZBED5
FAW_005537	-1.9053	0.00025898	0.00447039	ech-6
FAW_016347	1.90978	0.000259086	0.00447039	Slc17a5
FAW_015272	1.6545	0.000262603	0.00452298	retn
FAW_007798	-0.908975	0.000265493	0.00456459	Kat8
FAW_007937	-3.14505	0.000266858	0.00457988	Eppin
FAW_005985	-1.62908	0.000269603	0.00461876	--
FAW_001666	-6.41423	0.000271312	0.00463978	--
FAW_006320	-2.95355	0.000272045	0.00464406	ZUP1
FAW_019580	-1.19949	0.000275155	0.00468884	TAGLN2
FAW_014701	1.34112	0.000275919	0.00469355	--
FAW_020304	-0.878162	0.000279371	0.00474388	betaTry
MSTRG.8452	1.94974	0.000281764	0.0047761	CYP6L1
FAW_010166	6.14551	0.000285319	0.0048257	TkR99D
FAW_002350	-2.38403	0.000291044	0.00490749	--
FAW_019136	-3.19265	0.000293411	0.00493874	--
FAW_003947	-0.848779	0.000294159	0.00494269	gpt2
FAW_008481	1.05451	0.000300433	0.00503056	GRP
FAW_008584	2.91927	0.000303357	0.0050707	JHEH
FAW_008694	1.32196	0.000305507	0.00509519	exc-4
FAW_004112	-0.71915	0.000305881	0.00509519	Arhgef10
FAW_005911	-2.38675	0.000308181	0.00512168	Zw
FAW_003972	3.40067	0.000316354	0.00521659	HSD17B14
FAW_001533	-1.01332	0.000316709	0.00521659	Slc22a1
FAW_005082	-3.14749	0.000316791	0.00521659	Klp10A
FAW_008213	2.05063	0.000316961	0.00521659	--
FAW_016354	-0.85462	0.000320539	0.00526233	Mical
FAW_017809	1.78449	0.000320834	0.00526233	poe
FAW_019270	1.63111	0.000331924	0.00543497	--
FAW_004430	1.08982	0.000333321	0.00544859	CNNM2
FAW_007947	-0.701626	0.000338563	0.00552489	CG45057
FAW_018232	-1.21328	0.000339162	0.0055253	Amy4N
FAW_012031	-0.649825	0.000343308	0.00556459	AGPAT1
FAW_016665	-1.5695	0.000344837	0.00557999	Dnajc17
FAW_007167	1.57622	0.000347042	0.00560625	PR-Set7
FAW_014796	1.78427	0.000350959	0.00566002	svr
FAW_002107	1.92338	0.000351935	0.00566626	jagn
FAW_009875	1.7442	0.000354589	0.0056965	FAP
FAW_000970	-4.82093	0.000354996	0.0056965	RTase
FAW_014486	1.50085	0.000363435	0.00582222	--
MSTRG.2533	-2.62868	0.000364835	0.00583494	--
FAW_018723	1.98896	0.000366472	0.00584114	Cad87A
FAW_011166	-4.79796	0.00036761	0.00584114	Nrk
FAW_003362	1.13014	0.000368316	0.00584208	AAEL000263
FAW_017559	1.53152	0.000374261	0.00592662	PDXK
FAW_008621	-1.00925	0.000375007	0.00592868	msps
FAW_012373	-1.73903	0.000375732	0.00593041	trr
FAW_018436	1.63608	0.000378401	0.00596275	Cad99C
FAW_005427	-0.886739	0.000383439	0.00603227	--
FAW_018120	-1.43088	0.000389578	0.00611886	--
FAW_004420	1.78221	0.000390634	0.00612545	--
FAW_006109	-1.00375	0.000392778	0.00614905	Acy1
FAW_005639	2.1193	0.00039361	0.00615208	ANKS1A
FAW_014833	1.3278	0.00039705	0.00618576	aralar1
FAW_010977	1.20312	0.000405112	0.00629279	atg101
FAW_009994	-2.35341	0.000407214	0.00631346	DLG5
FAW_014901	-2.84999	0.000411458	0.00636899	Myo15a
FAW_011030	-0.645846	0.000412732	0.00637847	Zip99C
FAW_000482	-0.793681	0.000419737	0.00647633	CASC3
FAW_015625	-2.41618	0.000420775	0.00648196	SH3KBP1
FAW_003640	-0.596427	0.000422007	0.00649055	Mcf2l
FAW_004347	-0.880423	0.000424062	0.00650659	Slc31a1
FAW_009968	1.23464	0.000424401	0.00650659	--
FAW_019122	2.38587	0.000428735	0.00656223	--
FAW_000944	1.64423	0.000429394	0.00656223	SDR16C5
FAW_011278	-1.03978	0.00043316	0.0066093	--
FAW_017020	1.38442	0.000436423	0.00664855	ttk
FAW_000915	1.45231	0.000441955	0.00670844	2021-09-04
FAW_013176	2.093	0.000442335	0.00670844	pol
FAW_012103	-3.4975	0.000442445	0.00670844	--
FAW_004706	-1.14728	0.000450079	0.00680276	--
FAW_021160	1.44436	0.000454596	0.00686026	Oplah
FAW_008622	1.50296	0.000455812	0.00686785	--
FAW_008901	-5.65762	0.000459417	0.00691135	Nurf-38
FAW_017560	1.09503	0.000467777	0.00702612	akr2e
FAW_014563	1.24639	0.000468505	0.00702612	--
FAW_022691	2.33195	0.000470137	0.00703963	--
FAW_004325	-0.711451	0.000472193	0.00704732	PMS2
FAW_015791	1.47044	0.000472252	0.00704732	SIRT5
FAW_006793	-4.49025	0.000472847	0.00704732	alphaTry
FAW_009922	-1.4231	0.000482127	0.00716346	LCT
FAW_017802	1.53136	0.000483201	0.00716836	slc39a11
FAW_015607	-1.50732	0.00048588	0.00719701	--
FAW_004456	-0.910144	0.000486794	0.00719947	Jon99Cii
FAW_007762	1.52718	0.00049335	0.00727456	--
FAW_011010	-0.797671	0.000493964	0.00727456	ApepP
FAW_011926	-0.750611	0.000494138	0.00727456	Man2b1
FAW_012109	-2.57399	0.000495628	0.00728142	ceh-19
FAW_008178	-2.32415	0.000496116	0.00728142	ANPEP
FAW_011506	-1.2563	0.000499586	0.00732117	--
MSTRG.14186	-1.32791	0.000513409	0.00751231	--
MSTRG.6646	1.44167	0.000518322	0.00756122	--
FAW_003854	1.91165	0.000528534	0.00769453	Rm62
FAW_000079	5.32193	0.000529059	0.00769453	--
FAW_016655	3.33723	0.000535729	0.00777979	--
FAW_001028	1.26532	0.000538435	0.00780343	Hsf
FAW_001967	1.02967	0.000538978	0.00780343	--
FAW_009623	-0.601081	0.000541527	0.00782855	--
FAW_012284	1.41343	0.000544114	0.00783664	--
FAW_006383	2.57154	0.000545188	0.00783664	--
FAW_007329	-0.841206	0.000545342	0.00783664	--
FAW_015260	-0.652493	0.00055383	0.00793897	RHOJ
FAW_021624	1.25393	0.000554112	0.00793897	ADAMTSL4
FAW_019163	-0.599483	0.000556493	0.00796123	GRHPR
FAW_017061	1.67	0.000564312	0.00806113	GlyS
MSTRG.10622	-1.40394	0.000585087	0.00833317	IVD
FAW_007692	-1.28195	0.000592403	0.0084249	Non1
FAW_001744	-0.967168	0.000595948	0.00846037	l(2)efl
FAW_015400	-0.798921	0.000597666	0.00846037	egh
FAW_009799	-1.88444	0.000598306	0.00846037	--
FAW_000469	2.04746	0.000598917	0.00846037	--
FAW_015233	-1.41914	0.000602012	0.00848634	myoM
FAW_016743	1.95666	0.000605922	0.00852898	Ak1
FAW_000402	-0.728445	0.00060914	0.00854927	ADPS
FAW_005327	-0.947796	0.000618561	0.00866885	Kat6b
MSTRG.881	5.94251	0.000620006	0.00867648	--
FAW_010479	-2.56552	0.000621468	0.00868432	CDase
FAW_000151	-1.52637	0.000623321	0.00868638	Ssr1
FAW_011145	-1.42789	0.00062361	0.00868638	Cpa3
FAW_020172	-0.955181	0.000624322	0.00868638	NAGA
FAW_011838	1.3401	0.000626625	0.00870584	--
FAW_012365	1.36201	0.00062755	0.00870613	Ufd4
FAW_019360	1.48477	0.000629613	0.00872217	--
FAW_022425	3.40848	0.000636641	0.00880687	--
FAW_017843	1.14394	0.000640485	0.00883466	RE1
FAW_018460	1.34252	0.000643193	0.00885932	uda-1
FAW_017034	-3.39702	0.000644119	0.00885939	--
FAW_006393	-0.925736	0.000647062	0.00888718	--
FAW_022166	8.69448	0.000668169	0.009164	--
FAW_006041	1.30046	0.000673881	0.0092292	RE1
FAW_012942	1.10409	0.00068112	0.00930188	AATK
FAW_012125	-0.992473	0.000692993	0.0094056	4CLL7
FAW_015975	-0.687795	0.0006936	0.0094056	CLVS1
FAW_023063	-0.687795	0.0006936	0.0094056	Tmprss9
FAW_023082	-0.687795	0.0006936	0.0094056	kynU
FAW_016984	1.38039	0.000695909	0.00942365	TM_0325
FAW_004564	1.27084	0.000707352	0.00956515	SmydA-8
FAW_010866	2.82192	0.000709672	0.00958306	--
FAW_009824	-3.76646	0.000714797	0.00963874	TMC3
FAW_021065	1.1232	0.000719639	0.00969047	PGRP-SA
FAW_017558	1.36864	0.000727792	0.00978656	asf1
FAW_020839	1.30604	0.000729847	0.00980051	slc39a10
FAW_006048	-2.39402	0.000737543	0.00989006	Vps13a
FAW_014384	-0.660748	0.000739081	0.0098969	4CLL5
FAW_012994	1.14129	0.00074159	0.0099167	PPIE
FAW_010653	-1.18988	0.000752163	0.0100353	Pnlip
FAW_003667	1.51044	0.000754556	0.0100447	ptc
FAW_010548	-1.22702	0.000755335	0.0100447	--
FAW_004213	-2.00614	0.000766845	0.0101689	--
FAW_017143	-0.982317	0.000767465	0.0101689	--
FAW_007455	-0.60015	0.000767843	0.0101689	JHBP
FAW_022566	-1.55208	0.000775809	0.0102603	Pla1a
FAW_020750	-0.863005	0.000777566	0.0102694	--
FAW_012683	-1.58016	0.000779395	0.0102795	ABAT
FAW_002698	1.18294	0.000782036	0.0102982	KDM3A
FAW_010202	0.973051	0.000783058	0.0102982	RfC4
FAW_004169	-1.14369	0.000784026	0.0102982	--
FAW_005655	1.28546	0.000787088	0.0103244	--
FAW_016652	-2.45883	0.000788354	0.0103269	JHEH
FAW_015591	-1.05284	0.000790938	0.0103467	TCP11L1
FAW_017781	1.0336	0.000796607	0.0104067	--
FAW_016017	-0.6407	0.000799054	0.01042	--
FAW_015418	1.17802	0.000799789	0.01042	CTRL
FAW_008477	2.82543	0.000801663	0.0104303	--
MSTRG.12726	-2.25283	0.000810714	0.0105338	--
FAW_004374	-0.670839	0.000815719	0.0105846	UBE2R2
FAW_001836	-2.05364	0.000825147	0.0106704	ACAP2
FAW_008745	1.25647	0.000825957	0.0106704	Scpep1
FAW_021336	-0.737557	0.000826674	0.0106704	LAC1
FAW_007284	2.31113	0.000827188	0.0106704	CBX5
FAW_017496	1.25036	0.000827875	0.0106704	ACADSB
FAW_001989	1.53198	0.000837881	0.0107849	Lip1
FAW_016093	9.17159	0.000846453	1	ARGK
FAW_017054	1.70663	0.00085219	0.0109304	--
FAW_018667	-1.67626	0.00085259	0.0109304	cat2
FAW_010334	1.66423	0.00086241	0.0110354	mesh
FAW_017478	3.74043	0.000879705	0.0112332	FHL2
FAW_017033	-2.99442	0.000884928	0.0112849	4CL3
FAW_010979	-1.05015	0.000886136	0.0112853	Galt
FAW_017819	1.31041	0.000888759	0.0112983	Klkb1
FAW_006552	7.07708	0.0008895	0.0112983	Toll-7
MSTRG.6181	2.46525	0.000898233	0.0113754	--
FAW_000002	-0.793867	0.000899118	0.0113754	--
FAW_007012	2.43898	0.000913686	0.0115446	dlat-1
FAW_011382	-1.79518	0.000919421	0.0116018	TRAM1
FAW_020399	-2.74633	0.000936335	0.0117998	CG7457
FAW_001572	2.27585	0.000944049	0.0118814	Fgl1
FAW_009553	-3.71487	0.000947619	0.0118971	CDC73
FAW_011219	-0.930275	0.000958548	0.0120012	JHAMT
FAW_006848	1.62513	0.000962041	0.0120293	Vha13
FAW_014557	1.62759	0.000969822	0.0120951	--
FAW_010150	1.0092	0.000972227	0.0121094	betaTry
FAW_001202	-0.590585	0.000991345	0.0123157	Adam19
FAW_022954	-3.60881	0.000992923	0.0123194	Pnpla3
FAW_002793	1.3582	0.000997365	0.0123586	--
FAW_003827	1.07143	0.00100189	0.0123874	deltaTry
MSTRG.3083	1.30262	0.00102154	0.0125857	C7orf50
FAW_015972	-1.04006	0.00102393	0.0125857	ITPK1
FAW_022761	-1.04006	0.00102393	0.0125857	--
FAW_022764	-1.04006	0.00102393	0.0125857	Tmprss9
FAW_017039	-2.99277	0.00102537	0.0125857	Cyp3a9
FAW_013221	1.2338	0.00102615	0.0125857	--
FAW_003314	1.31257	0.0010336	0.0126609	Rhou
FAW_010101	1.16212	0.00103672	0.012683	ACHE1
FAW_008434	2.07255	0.00104489	0.0127548	ZSWIM5
FAW_008215	1.15894	0.00104523	0.0127548	hibA
FAW_006104	1.58213	0.00107165	0.0130606	--
FAW_020536	5.63077	0.001086	0.0132187	RNF31
FAW_001925	2.92043	0.00109137	0.0132673	Best3
FAW_014674	1.46199	0.00109319	0.0132726	GBA3
FAW_009783	-2.06477	0.00110209	0.0133639	--
FAW_019319	3.36075	0.00111943	0.0135422	--
FAW_005500	-1.80264	0.00111986	0.0135422	HMCN2
FAW_011399	-1.50676	0.00112101	0.0135422	SMOX
FAW_004378	2.05399	0.00112286	0.0135475	--
FAW_012414	2.65149	0.00112467	0.0135523	ARHGEF12
FAW_020312	1.23897	0.00113012	0.013601	--
FAW_001831	1.58307	0.00113572	0.0136457	--
MSTRG.7942	-0.589006	0.00113667	0.0136457	--
FAW_014987	-1.38769	0.00114232	0.0136965	rhbg
FAW_005185	1.36957	0.00115914	0.0138636	--
FAW_005511	1.99963	0.00116322	0.0138951	PHYH
FAW_005014	1.72578	0.00116498	0.0138989	B1
FAW_006368	-1.64719	0.00117314	0.013979	--
FAW_015174	1.97059	0.00118123	0.0140579	--
FAW_008623	1.67033	0.00118742	0.0141142	SLC17A5
FAW_020199	-1.36944	0.00119603	0.0141831	TSPAN31
FAW_017347	-2.87238	0.00119616	0.0141831	P25
FAW_013117	3.43543	0.00120443	0.0142636	Sply
FAW_004151	2.2605	0.00120754	0.0142828	l(2)efl
FAW_017888	-10.2448	0.00120794	1	--
FAW_018139	-0.691463	0.00121364	0.0143374	--
FAW_013141	-1.59949	0.00122487	0.0144523	GST1
FAW_011740	1.40643	0.001229	0.0144833	T05H10.6
FAW_006595	1.75914	0.00123472	0.0145247	lola
FAW_004018	1.56223	0.00123598	0.0145247	MEX3A
FAW_018253	-0.767127	0.0012434	0.0145815	Ssbp3
FAW_004301	2.16368	0.00124583	0.0145922	Fbxo32
FAW_000891	2.46679	0.00125299	0.0146125	STMN4
FAW_004974	1.27249	0.00125351	0.0146125	Cpa4
FAW_008577	-0.647284	0.00125363	0.0146125	--
FAW_015875	1.31929	0.00125742	0.014639	rergl
FAW_022026	1.20337	0.00126401	0.0146738	--
FAW_020168	-1.09355	0.00126412	0.0146738	CG4502
FAW_005367	1.39025	0.00126498	0.0146738	--
FAW_001927	3.43296	0.00127547	0.0147776	KCNJ2
FAW_003656	1.24339	0.0012896	0.0149234	AAEL001134
MSTRG.824	-2.55269	0.00129291	0.0149437	sug
FAW_016442	2.16356	0.00129763	0.0149803	--
FAW_005933	3.54627	0.0013059	0.0150397	--
FAW_020639	-2.74892	0.00130959	0.0150642	CG13690
FAW_015877	1.64304	0.00132694	0.0152456	--
FAW_011992	-1.55967	0.00133124	0.0152586	liph-a
FAW_011848	1.39685	0.00133608	0.0152958	TY3B-I
FAW_009196	1.12864	0.00135627	0.0155085	Slc17a5
FAW_005703	-1.92059	0.00135994	0.015532	Rtf1
FAW_001680	-0.992466	0.00138023	0.015745	SLC31A1
FAW_007950	1.38176	0.00139436	0.0158687	4cl1
FAW_005884	-0.751607	0.00139605	0.0158691	--
FAW_003382	2.23375	0.00139814	0.0158741	Myo61F
FAW_012885	1.78053	0.00140304	0.0158932	TMPRSS15
MSTRG.15834	-1.26897	0.00140575	0.0159043	Slc5a12
FAW_015131	1.05754	0.00140864	0.0159183	--
FAW_015364	1.71621	0.00141157	0.0159258	slc46a1
FAW_020600	1.51505	0.00141261	0.0159258	Gabbr1
FAW_014425	1.35589	0.00141826	0.0159707	Samd5
FAW_002979	1.44443	0.00142911	0.0160367	SULT1C4
FAW_001167	-10.1548	0.00144508	0.0161782	gol
FAW_006321	-2.24472	0.00145057	0.0162207	4CL1
FAW_004587	3.00808	0.00148441	0.0165416	--
FAW_000960	-12.1378	0.00149531	0.0166438	VG
FAW_001663	-1.50572	0.00152879	0.0169717	GA20843
FAW_008095	3.11548	0.00153006	0.0169717	GA15091
FAW_007976	-1.01307	0.00154557	0.0171042	CPB1
FAW_004483	1.36157	0.00154572	0.0171042	Slc25a3
FAW_005369	1.89934	0.00154734	0.0171042	UCKL1
FAW_006416	-2.43807	0.00156138	0.0171956	CYP6B6
FAW_022657	-1.62523	0.00156183	0.0171956	--
FAW_006557	4.22607	0.00156221	0.0171956	--
FAW_012012	-1.34242	0.001564	0.0171956	ANKRD13C
MSTRG.6818	-3.25873	0.00156453	0.0171956	CG8611
FAW_014752	1.29616	0.00157395	0.0172597	Toll-6
FAW_019815	1.91496	0.00158034	0.01731	--
FAW_001916	-1.45929	0.00159246	0.017423	MARF1
FAW_015681	-0.638619	0.00161596	0.01764	--
FAW_012290	5.1565	0.00161624	1	LCC4
FAW_018267	1.33832	0.00162365	0.0177039	Sdr16c6
FAW_014533	1.97539	0.00162884	0.0177241	brat
FAW_003012	1.53198	0.00162919	0.0177241	SOCS5
FAW_021547	-2.29178	0.00163136	0.0177276	AIG1
FAW_001921	-1.76065	0.00163893	0.0177898	--
FAW_010779	-1.08489	0.00164598	0.0178294	RTase
FAW_006929	-1.22918	0.00164627	0.0178294	TY3B-I
FAW_009538	-0.781119	0.00166068	0.017945	--
FAW_008715	1.65579	0.00167441	0.0180731	Snmp2
FAW_009920	-1.47845	0.0016823	0.0181379	Cyt-c-p
FAW_011009	-0.599667	0.00168555	0.0181526	--
FAW_007289	1.12287	0.00168973	0.0181774	SLC17A5
FAW_001650	2.42331	0.00169633	0.0182279	--
FAW_012581	1.07533	0.00171963	0.0184167	--
FAW_014885	2.15026	0.00172435	0.0184368	Orct
FAW_001868	1.15635	0.00172534	0.0184368	--
FAW_012151	2.49282	0.00172861	0.0184513	sdk
FAW_000911	1.50675	0.00174161	0.0185695	--
FAW_018820	1.54089	0.00176684	0.0188177	--
FAW_009485	1.65066	0.00178185	0.0189566	Slco3a1
FAW_007910	1.33438	0.00178613	0.0189803	Tret1
FAW_006296	-1.89491	0.0017882	0.0189803	Ets21C
FAW_014670	1.78456	0.00179769	0.0190409	RAB23
FAW_000143	1.20629	0.00180349	0.0190813	Fur2
FAW_000628	3.43867	0.00183164	0.019338	epsilonTry
FAW_010055	-4.06759	0.00183177	0.019338	BAZ2B
FAW_006717	1.99719	0.00183429	0.0193434	Plod3
FAW_011866	1.84932	0.00184163	0.0193723	Jon99Cii
FAW_005368	1.56328	0.00184189	0.0193723	CEL
FAW_003982	-1.80044	0.00184806	0.0193893	DYRK2
FAW_004619	-0.703629	0.00185377	0.0194212	PDZD2
FAW_014847	-1.60159	0.00186064	0.0194509	NCOA6
FAW_010180	1.6081	0.0018683	0.0194675	--
FAW_019948	3.00539	0.00187124	0.0194771	MYO15A
FAW_011450	1.39199	0.00187612	0.0195068	dhdh
FAW_016261	1.66462	0.00188376	0.019544	CG1544
FAW_006450	-1.11837	0.00193178	0.0200207	tdh
FAW_001848	1.17415	0.00195863	0.0202553	Fahd2
FAW_003300	-2.21239	0.00198296	0.02047	Fas2
FAW_012145	2.00637	0.00199325	0.0205471	SEC61A2
FAW_005015	2.31652	0.0020287	0.0208902	Ac76E
FAW_007244	1.63912	0.00203823	0.0209659	--
FAW_007508	2.2486	0.0020488	0.0210522	--
FAW_008174	-1.7625	0.002057	0.0211139	--
FAW_004326	1.56575	0.00206129	0.0211266	RABGAP1
FAW_021228	-1.06505	0.00206804	0.0211595	Slc17a5
FAW_004404	1.71887	0.00207356	0.0211935	CG17065
FAW_021016	1.41045	0.00207816	0.021218	--
FAW_020169	-0.912371	0.00211522	0.0215506	COL11A2
FAW_003194	2.25976	0.00212661	0.0216242	daf-36
FAW_016430	1.5899	0.00212694	0.0216242	ADA2
FAW_016216	-0.959235	0.00213484	0.0216817	Lrp2
FAW_000707	1.85993	0.00214181	0.0217296	HIGD1A
FAW_008625	1.97015	0.00216284	0.0219198	--
FAW_012776	5.39839	0.00216873	0.0219564	ari-1
FAW_013066	2.89691	0.00217519	0.0219987	--
FAW_021887	3.00044	0.00218897	0.0221148	SLCO5A1
FAW_015860	1.45343	0.00220489	0.022229	--
FAW_017920	-8.69116	0.00225576	1	slc39a1
FAW_015037	7.85271	0.00227251	0.0228628	--
FAW_004842	-1.15008	0.00227955	0.0229098	sel
FAW_001364	-1.08983	0.00229151	0.022982	Slc26a11
FAW_015066	1.47883	0.00229445	0.0229874	GMPR
FAW_004263	-0.71539	0.00229931	0.0229884	PRTN3
FAW_020930	-1.66327	0.00230725	0.0230438	DDX5
FAW_004702	-0.713466	0.00231996	0.0231374	--
FAW_019272	1.22067	0.00232143	0.0231374	--
FAW_015956	1.02962	0.00232753	0.0231459	JUN
FAW_017994	1.17249	0.00233175	0.0231459	TSPAN17
FAW_005365	-1.16645	0.00234594	0.0232454	CG11148
FAW_012013	-0.777644	0.00234675	0.0232454	Glod4
FAW_010069	-6.3159	0.00235415	0.0232708	--
FAW_004269	-2.88006	0.00237531	0.0234559	Arap3
FAW_016620	-3.70044	0.00239522	1	CYP6B2
FAW_020196	1.3142	0.00240648	0.0237151	--
MSTRG.4589	-1.60737	0.00241547	0.0237792	pol
FAW_005492	-1.39579	0.00242031	0.0238026	Tf2-12
FAW_020013	1.27825	0.00244017	0.0239489	--
FAW_004232	-1.91097	0.00245483	0.0240684	--
FAW_000537	3.29908	0.00246022	0.0240914	FDPS
FAW_000853	1.45536	0.00246218	0.0240914	Jon99Cii
FAW_007816	-1.361	0.00248357	0.0242682	Ppn
FAW_018563	-1.82597	0.00248529	0.0242682	ttk
FAW_001588	1.47018	0.00248866	0.0242764	--
FAW_016006	2.32905	0.00252833	0.0246135	Nep2
FAW_000203	1.30418	0.0025399	0.0246807	--
FAW_013229	-2.07357	0.00254036	0.0246807	--
FAW_022408	1.82866	0.00254863	0.0247361	jockey\pol
FAW_018499	3.04022	0.00256	0.0248025	pug
FAW_008796	-0.89807	0.00256062	0.0248025	--
FAW_011646	-3.43657	0.00256533	0.0248082	SEC14L2
FAW_016561	-1.92298	0.00256637	0.0248082	Bnip3
FAW_011337	-2.60495	0.00262352	0.0252957	CSAD
FAW_004790	1.89898	0.00262716	0.0252957	afmid
FAW_000131	1.22031	0.00262731	0.0252957	--
FAW_009282	-0.832606	0.00265358	0.0255231	--
FAW_000689	1.94493	0.00267436	0.0256974	Cpa5
FAW_001662	-2.70627	0.00268427	0.0257668	--
FAW_012765	-0.719625	0.00270505	0.0259405	--
FAW_016544	-2.97728	0.00271144	0.0259759	Nadk2
FAW_020219	1.38196	0.00273249	0.0261515	--
FAW_011104	1.69582	0.00274856	0.0262791	CEP250
FAW_008334	2.05473	0.00275977	0.0263602	Fzr1
FAW_011202	0.954926	0.00277646	0.0264696	rep
FAW_021461	-0.645061	0.00277749	0.0264696	DNApol-alpha60
FAW_018819	1.86729	0.00277947	0.0264696	--
FAW_004673	1.30321	0.00278544	0.0265002	Nalcn
FAW_014555	-2.61852	0.00278849	0.026503	--
FAW_018128	-2.05782	0.00280347	0.0266192	--
FAW_005527	1.70501	0.00281995	0.0266823	ARHGEF17
FAW_008554	2.26422	0.0028202	0.0266823	METRNL
FAW_021510	1.26536	0.00282123	0.0266823	Cp1
FAW_011168	2.22239	0.00282398	0.0266823	kh
FAW_010624	-2.16092	0.00283522	0.0267623	SLC12A6
FAW_009022	1.98556	0.00284977	0.0268732	--
FAW_011222	-1.71767	0.00286127	0.0269553	GST1
FAW_019963	1.29308	0.00286655	0.0269787	--
FAW_007971	1.98753	0.00287118	0.0269958	SUGTL3
FAW_006285	-2.83854	0.00288182	0.0270695	TY3B-I
FAW_003682	1.349	0.00288979	0.0271029	--
FAW_011127	-1.19789	0.00289102	0.0271029	CFDP2
FAW_020827	1.26562	0.00290884	0.0272435	--
FAW_003330	-0.891241	0.0029154	0.0272784	ADGRG1
FAW_000235	-1.38698	0.00295165	0.0275908	SLC27A4
FAW_001896	2.5057	0.00295869	0.0276297	--
FAW_009539	-1.78894	0.00298078	0.0277719	Tret1
FAW_008344	-0.628673	0.00299211	0.0277946	--
FAW_022010	1.69157	0.00299797	0.0277946	HERC2
FAW_005083	-0.725057	0.00299804	0.0277946	2021-03-05
FAW_010013	-1.68684	0.00300171	0.0277946	hceb
FAW_004818	1.90222	0.00305662	0.028243	--
FAW_007448	-0.597013	0.00307202	0.028358	yvkC
FAW_001079	1.40824	0.00308639	0.0284634	--
FAW_021843	8.38082	0.00308667	1	AAEL008004
FAW_023278	-9.50515	0.00309036	0.0284727	sno1
FAW_010587	1.09343	0.00310285	0.0285194	CPO
FAW_005666	1.61239	0.00310548	0.0285194	ANPEP
FAW_000048	-1.31441	0.00310999	0.0285194	--
FAW_007645	1.43386	0.00312719	0.0286476	CAMTA2
FAW_003137	-0.658648	0.00313682	0.0287085	CG14806
FAW_009602	-1.13642	0.00315028	0.0288043	--
FAW_000509	-0.749631	0.00317246	0.0289521	--
FAW_000874	2.08041	0.00320171	0.0291636	--
FAW_020506	1.88774	0.00320472	0.0291636	SELENOI
FAW_009053	-2.64824	0.00321393	0.0292198	--
FAW_016598	-1.7979	0.00322135	0.0292596	SEC14L4
FAW_003178	1.075	0.00322848	0.0292902	ADAP1
FAW_000545	-0.675026	0.00323081	0.0292902	bin3
FAW_008657	1.41675	0.00323405	0.029292	--
FAW_004992	1.8021	0.00323981	0.0292955	B1
FAW_001285	-11.4443	0.00324052	0.0292955	PLEKHG1
FAW_004459	2.42248	0.00324806	0.0293191	Sccpdh
FAW_002369	1.38433	0.00324922	0.0293191	PPAE
FAW_018869	1.26398	0.00326964	0.0294757	Ggt1
FAW_020007	1.2669	0.00328008	0.0295172	--
FAW_007733	2.46443	0.00328141	0.0295172	Sap47
FAW_016656	-2.3449	0.00328343	0.0295172	YTHDC2
FAW_001095	-2.10046	0.00331179	0.0297166	Gld
FAW_005328	-0.809012	0.00332308	0.0297763	VHA16
FAW_007049	1.10692	0.00332463	0.0297763	path
FAW_005560	1.35783	0.00334293	0.0298846	ermp1
FAW_017760	-0.692775	0.00334877	0.0298973	eg
FAW_002059	4.09165	0.00335056	0.0298973	--
FAW_021895	1.90302	0.00336112	0.0299476	--
FAW_016621	-1.76984	0.00337647	0.030045	MINPP1
FAW_010311	-1.48908	0.00338618	0.0300788	CG42684
FAW_008527	2.36642	0.00339092	0.0300788	CdGAPr
MSTRG.17791	-1.21761	0.00339277	0.0300788	FHOD3
FAW_010186	2.92261	0.00339863	0.0300897	Heatr5b
MSTRG.2120	-0.844284	0.00343493	0.0303409	CPM
FAW_007963	1.47185	0.00345085	0.0304535	AAEL005241
FAW_008976	4.48113	0.00345491	1	PNLIPRP2
FAW_005528	1.10009	0.00346218	0.0304976	Nell1
FAW_018119	-0.884869	0.00351051	0.030895	--
FAW_001816	0.964786	0.00352027	0.0309156	PPM1D
FAW_009790	1.11418	0.00352249	0.0309156	jockey\pol
FAW_018534	4.67337	0.00352569	0.0309156	PNLIP
FAW_020626	-1.98206	0.00353761	0.0309886	--
FAW_020367	1.43325	0.00354045	0.0309886	--
FAW_010123	1.18962	0.00355056	0.0310489	--
FAW_018852	4.68519	0.00355597	0.0310679	Ect4
FAW_022655	-0.940107	0.00356302	0.0311013	Lar
FAW_001990	8.99435	0.00356868	1	--
FAW_020119	-3.44574	0.00360518	0.0313839	l(1)G0004
FAW_018753	1.38128	0.00362723	0.0315459	LRRC40
FAW_016528	-1.904	0.00363182	0.0315459	Agxt
FAW_022022	-5.45943	0.00363361	0.0315459	RANBP1
FAW_018469	1.75309	0.00363712	0.0315479	stambpa
FAW_007142	1.08805	0.00364397	0.0315632	--
FAW_012039	-1.7366	0.00364544	0.0315632	SORD
FAW_011344	-2.31194	0.003674	0.0316837	Indy
FAW_001087	-2.3565	0.00367489	0.0316837	--
FAW_010392	2.91754	0.00367582	0.0316837	Gtpbp2
FAW_001507	-3.28809	0.00370319	0.0318058	acp4
FAW_018562	-1.96172	0.00372108	0.031931	npl-b
FAW_010060	1.40661	0.00372615	0.031946	Clcn7
FAW_009260	1.5496	0.00375024	0.0321239	--
FAW_006068	1.88296	0.0037783	0.0323356	Cpa4
FAW_006039	1.31892	0.00378709	0.032382	GalNAc-T1
FAW_015996	-2.05453	0.00382397	0.0326104	--
FAW_007631	-2.68032	0.003845	0.0327608	--
FAW_001819	2.22856	0.0038742	0.0329512	SUCO
FAW_001460	2.16074	0.0038921	0.0330457	cpq
FAW_016980	1.66037	0.00389218	0.0330457	--
FAW_005577	-0.739599	0.0039011	0.0330924	CG4928
FAW_020093	1.84707	0.00390545	0.0331001	Orct
FAW_017272	-2.95121	0.00391247	0.0331304	MTMR8
FAW_011204	4.44298	0.00392083	0.0331702	Pard3
FAW_016143	1.692	0.00392541	0.0331702	ELOVL4
FAW_015744	1.60068	0.00392751	0.0331702	--
FAW_011260	1.16995	0.00396056	0.0333891	IL16
FAW_020895	-2.01381	0.00396276	0.0333891	--
FAW_019571	-0.78947	0.00396438	0.0333891	SLC19A1
FAW_010008	1.19123	0.0039673	0.0333891	FNBP1
FAW_006915	2.16763	0.00397913	0.0334595	C21orf2
FAW_009572	1.49901	0.00399016	0.0335229	pol
FAW_016892	1.64076	0.00399372	0.0335236	--
FAW_013101	4.21917	0.00399717	1	Trafd1
FAW_011129	-1.63245	0.00401111	0.0336402	--
FAW_006112	4.42626	0.00403024	1	Map3k12
FAW_021492	-1.7123	0.00403491	0.033798	GNBP3
FAW_008568	-0.937468	0.00403694	0.033798	4CLL5
FAW_017082	-1.09114	0.00404442	0.0338311	MYO9A
FAW_005535	1.23833	0.00407147	0.0340279	CG42265
FAW_008911	-1.06232	0.0041308	0.0343449	Pnlip
FAW_003581	1.92305	0.00413702	0.0343669	Spag7
FAW_009603	1.50886	0.00414873	0.0344344	Odc1
FAW_021980	-0.633857	0.00416258	0.0344744	Wdr47
FAW_010312	1.27234	0.00416428	0.0344744	Atp2c1
FAW_000349	-0.780587	0.00418644	0.0345983	cyb5r2
FAW_005183	-1.98548	0.0042062	0.0347021	--
FAW_007632	-4.11151	0.00421578	0.0347513	Cont
FAW_008395	-1.05236	0.00423908	0.0349135	phm
FAW_001661	-1.07087	0.00424302	0.034916	--
FAW_000636	-0.935843	0.00426417	0.0350319	ALPL
FAW_008912	1.08015	0.00426438	0.0350319	pld3
FAW_004770	-1.68634	0.00427688	0.0351047	--
MSTRG.414	2.06876	0.00434975	0.0356421	--
FAW_011362	-0.599107	0.00436989	0.0357767	MELTF
FAW_013040	2.45522	0.00438454	0.0358356	--
FAW_003823	-1.07984	0.0044048	0.0359706	PDSS2
FAW_018752	1.49617	0.00440862	0.0359714	SNX25
FAW_011575	1.79586	0.00441363	0.0359818	Ctsb
FAW_001091	-1.18228	0.00443356	0.0360831	pola1
FAW_000046	-0.644066	0.0044417	0.0361188	Arhgap20
FAW_010546	1.98134	0.00444867	0.0361449	TRYP7
FAW_012825	-1.1063	0.00446452	0.0362431	--
FAW_016419	1.1148	0.00449067	0.0363341	Tmprss6
FAW_010452	-2.35468	0.00449261	0.0363341	--
MSTRG.882	4.75002	0.00452851	0.036547	ALG10
FAW_018059	-2.83519	0.00455706	0.0366851	Mal-A1
FAW_001591	-0.736255	0.00457441	0.0367885	--
FAW_016985	2.18747	0.00457754	0.0367885	agp
FAW_008707	-0.897647	0.00459815	0.0369233	CYTH1
FAW_016423	1.4248	0.0046083	0.0369739	LARP6
FAW_000498	1.33876	0.00462355	0.0370184	CadN
FAW_012116	1.80906	0.00462538	0.0370184	h2afx
FAW_006730	1.11836	0.00465091	0.0371919	Abcg1
FAW_003368	1.28337	0.00465779	0.037216	Jon99Ci
FAW_020947	1.27029	0.00466232	0.0372212	cpnA
FAW_018432	-0.626438	0.00467846	0.0372574	--
FAW_022201	-1.18498	0.00471094	0.0374851	--
MSTRG.11793	-10.4374	0.00471309	1	--
FAW_020124	-2.53604	0.00472394	0.0375093	--
FAW_005139	0.965049	0.00473611	0.0375093	--
FAW_006106	3.98351	0.00473659	0.0375093	actA3a
FAW_021019	1.38514	0.00473737	0.0375093	4CLL6
FAW_019543	-1.35126	0.00476399	0.0376273	pol
FAW_006061	1.32032	0.00480263	0.0378183	mthl1
FAW_004891	1.27558	0.00480388	0.0378183	--
FAW_007655	-1.79135	0.00482514	0.0379546	AGPAT3
FAW_001772	-0.776177	0.00483724	0.0379677	Slc25a11
FAW_009271	1.81523	0.00488619	0.0383097	drpr
FAW_020852	-2.18777	0.00489431	0.0383359	bowl
FAW_018142	-0.649522	0.00489751	0.0383359	UBE2Q1
FAW_003793	1.19161	0.00492866	0.0385348	EGT
FAW_009095	-2.03672	0.00493617	0.0385446	path
FAW_004121	1.22838	0.00495611	0.0386376	Ext2
FAW_022728	1.73041	0.00496675	0.038688	sick
FAW_007498	1.29662	0.00497062	0.038688	Cyp304a1
FAW_017130	-0.961297	0.00498715	0.0387546	GOX2015
FAW_005517	-0.993002	0.00498722	0.0387546	Paqr3
FAW_010350	-1.96364	0.0050066	0.0388425	TM_0325
FAW_019061	1.73883	0.00502592	0.0389305	Dnajc1
FAW_003484	-0.607683	0.00502603	0.0389305	Tmem185b
FAW_012893	-0.794409	0.005039	0.0389996	--
FAW_011888	-1.1638	0.00504636	0.0390039	F10
FAW_001859	1.79396	0.00504766	0.0390039	--
FAW_011130	-1.73203	0.00506018	0.0390693	GST1
FAW_005996	-1.8501	0.00507017	0.0391151	--
FAW_008898	-11.6662	0.00508033	0.0391438	GIT2
FAW_003631	-0.90459	0.00508202	0.0391438	APOD
FAW_016860	1.60072	0.00511036	0.0393306	Washc1
FAW_007745	-0.712019	0.00513563	0.0394935	--
FAW_013083	1.20346	0.00514888	0.0395378	--
FAW_015154	1.46927	0.00514961	0.0395378	king-tubby2
FAW_010545	1.6199	0.0051569	0.0395622	FER
MSTRG.11585	-1.13017	0.00516253	0.0395739	WDR20
MSTRG.14973	3.7103	0.0051912	0.0397177	Pnliprp2
FAW_003299	1.29619	0.00519815	0.0397204	SLC39A1
FAW_011703	1.385	0.00521338	0.0398052	--
FAW_009474	-1.23099	0.00522632	0.039834	alas2
FAW_009731	1.2387	0.00522956	0.039834	--
FAW_006817	1.21714	0.00524725	0.0399372	Sqstm1
FAW_019669	1.56405	0.00532042	0.0403983	Cyt-b5
FAW_014329	2.54998	0.00532659	0.0404133	Sh3rf3
MSTRG.6668	1.63233	0.00533339	0.040433	miox
FAW_007162	-2.40551	0.00541842	0.0409486	--
FAW_022570	-1.91645	0.00544916	0.0411486	TG
FAW_008666	3.14909	0.00545578	0.0411663	--
FAW_004338	10.6912	0.00546245	0.0411844	ELOC
FAW_017141	-1.48104	0.00546762	0.0411911	Prep
FAW_010797	1.28118	0.00553124	0.0416378	Robo1
FAW_008138	1.40744	0.00554853	0.0416787	rad54l2
FAW_004424	1.28024	0.00554966	0.0416787	BIRC6
FAW_001873	1.2453	0.00557759	0.0418232	AAEL002956
FAW_010287	-9.04075	0.00558239	0.0418267	eas
FAW_009996	-1.78094	0.0056005	0.0419155	--
FAW_006783	-0.609493	0.00560296	0.0419155	NFYC
FAW_002614	1.49469	0.00562026	0.0420123	HtrA2
FAW_009116	-1.01582	0.00565434	0.0422316	pol
FAW_007792	-1.55199	0.00565837	0.0422316	--
FAW_007713	1.74663	0.00566757	0.0422572	Cpvl
FAW_018733	1.15423	0.00567626	0.0422668	--
FAW_002817	1.01425	0.00571281	0.0423871	Skeletor
FAW_009936	-0.588284	0.00571304	0.0423871	ubq-1
FAW_019591	1.0807	0.00571443	0.0423871	LZTR1
FAW_018910	1.95291	0.00575332	0.0425837	Tret1
FAW_001085	-2.19372	0.00575524	0.0425837	Mdr49
FAW_010020	-0.913048	0.00575862	0.0425837	Ces1e
FAW_014628	1.68433	0.00578284	0.04273	--
FAW_009213	1.95915	0.00579642	0.0427975	C09D4.1
FAW_015003	2.50381	0.00580699	0.042842	Cers6
FAW_005581	1.43433	0.00581797	0.042842	--
FAW_009776	1.7885	0.00582276	0.042842	yem
FAW_015038	12.1737	0.0058247	0.042842	PNLIP
FAW_007246	-1.99854	0.00584426	0.0429436	--
FAW_011447	-3.32974	0.00584743	0.0429436	Abcg1
FAW_021314	1.99496	0.00585334	0.0429543	CG5270
FAW_009421	-9.05889	0.00588146	0.0431277	DNAJC7
FAW_016391	1.39227	0.00588792	0.0431422	Ttc28
MSTRG.12385	1.4888	0.00590254	0.0431998	Pkn
FAW_006569	1.38127	0.00590475	0.0431998	SODCC
FAW_008485	1.128	0.00594499	0.0433908	--
FAW_022037	-1.26303	0.00594889	0.0433908	ATP6AP1
FAW_014363	1.32145	0.00595814	0.0434254	PPP2R3B
FAW_000613	-1.71334	0.00597726	0.0435318	--
FAW_001841	-0.679129	0.00598855	0.0435811	--
FAW_000730	1.34582	0.00601459	0.0437375	creld2
FAW_015078	2.22794	0.00604086	0.0438623	--
FAW_010057	3.50096	0.00610623	0.0442328	cbd-1
FAW_009199	1.69904	0.00611026	0.0442328	Tret1
FAW_009398	1.11784	0.0061189	0.044262	--
FAW_008546	-0.914297	0.00615233	0.0444704	prom1a
FAW_014488	1.76309	0.00616319	0.0445155	CDase
FAW_003398	1.51157	0.00619271	0.0446952	--
FAW_005941	-2.58162	0.00620969	0.0447783	--
FAW_004819	2.18629	0.00621589	0.0447783	fabG
FAW_021124	2.10099	0.00621818	0.0447783	Wdr33
FAW_000763	1.79874	0.00622301	0.0447796	Kibra
FAW_016992	7.80305	0.00624506	1	--
FAW_005493	1.60935	0.00625266	0.0449258	--
FAW_005522	1.11808	0.006259	0.0449378	Atp6v0b
FAW_022077	-2.10375	0.00628056	0.0449809	ME1
FAW_007879	1.08851	0.00628321	0.0449809	C3G
MSTRG.16082	-1.82484	0.00628369	0.0449809	Def6
FAW_009566	-1.31603	0.00632545	0.0452462	spri
FAW_007165	1.5605	0.00643597	0.0460026	SLC2A8
FAW_012030	-0.6706	0.00645869	0.0461308	TBC1D16
FAW_003768	2.16218	0.00649356	0.0463454	--
FAW_013244	-0.901368	0.00650484	0.0463916	--
FAW_006328	-0.700721	0.00651504	0.0464299	4CL1
FAW_009023	1.46047	0.00655637	0.0466899	pol
FAW_008632	4.89077	0.00655667	1	Hgsnat
FAW_001811	-2.03531	0.00656866	0.0467428	--
FAW_000337	-2.29726	0.00657708	0.0467682	--
FAW_009372	1.56898	0.0065882	0.0467781	Lrig3
FAW_009207	-0.740875	0.00660963	0.0468958	UGT2B10
FAW_008683	1.56352	0.00662055	0.0469386	MPC2
FAW_020460	-0.730358	0.00668587	0.0473668	--
FAW_006724	1.52699	0.00670627	0.0474765	Mp20
FAW_014545	-0.791844	0.00672932	0.047537	STK3
FAW_003731	-0.734629	0.00672963	0.047537	zig-3
FAW_017536	1.11428	0.00675919	0.0476758	--
FAW_015702	-1.43707	0.0067857	0.0478277	CFDP2
FAW_001708	1.05773	0.00679154	0.0478339	JARID2
FAW_002062	5.75192	0.0068078	1	--
FAW_018347	-2.36511	0.00680932	0.0479241	cdo1
FAW_011291	1.05534	0.00683051	0.0480381	LAMP2
FAW_009720	1.37933	0.00685149	0.04809	--
FAW_007169	1.81144	0.00685271	0.04809	--
FAW_012472	1.47694	0.00685565	0.04809	GstZ2
FAW_003575	1.52717	0.00685788	0.04809	--
FAW_011079	1.35552	0.00689112	0.0482269	SLC25A15
FAW_016368	1.73312	0.00691536	0.0483523	Slc25a16
FAW_004418	1.372	0.00692145	0.0483598	Men1
FAW_021545	-2.46263	0.00693246	0.0483809	CDIPT
FAW_011607	-1.20651	0.00693956	0.0483809	--
FAW_016821	1.33529	0.00696439	0.0485189	SLC27A4
FAW_000341	1.28087	0.00701108	0.0488089	BCKDHB
FAW_005117	1.30705	0.00702529	0.0488372	SLC26A11
FAW_014849	-2.02837	0.00706009	0.0490042	--
FAW_009096	-1.60954	0.00706458	0.0490042	PPP1R12A
FAW_004745	-1.19794	0.00710973	0.049242	Semp1
FAW_019505	1.48851	0.00713777	0.0493696	Casz1
FAW_004373	1.21291	0.00715762	0.0494713	--
FAW_013085	1.31722	0.00716745	0.0495037	rrp36
FAW_018565	1.23144	0.00718022	0.0495564	--
FAW_007930	-1.23558	0.00722326	0.0497465	--
FAW_005973	-1.14928	0.00724861	0.0498788	AAEL008960
FAW_000257	-0.863706	0.00725284	0.0498788	C19orf47
FAW_017462	14.1804	0.00726695	0.0499402	--
FAW_018158	1.25892	0.00727344	0.0499491	par-6
FAW_008420	-2.16636	0.0072881	0.0500141	--
FAW_007975	2.3787	0.0072967	0.0500375	SLC17A5
FAW_017579	-0.673236	0.00730427	0.0500538	Flnc
FAW_011496	-1.4757	0.00731066	0.0500619	SPR
FAW_021206	2.41248	0.00732156	0.0501009	--
FAW_020130	2.57757	0.00733381	0.0501491	pgant2
FAW_002693	1.70973	0.00739198	0.050511	Upp1
FAW_018804	-0.71574	0.00740264	0.050548	LCC5
FAW_021316	4.34746	0.00741429	0.0505916	Csk
FAW_003749	1.76488	0.00743253	0.0506213	nkx2.2a
FAW_010385	1.04129	0.00744351	0.0506213	pyx
FAW_011532	2.18587	0.00744373	0.0506213	--
FAW_020177	1.25625	0.007468	0.0507424	BAZ1A
FAW_000262	2.48278	0.00749029	0.050822	Adcy9
FAW_008639	1.61365	0.00750126	0.0508607	Sv2c
FAW_018378	-1.11667	0.00751127	0.0508927	nrf-6
FAW_009586	1.96615	0.00752073	0.0508973	CHYM2
FAW_020429	-1.30224	0.00752252	0.0508973	ARFGEF3
FAW_020837	1.5213	0.00757225	0.0511978	--
FAW_012396	-1.43624	0.00759728	0.051331	ACHE1
FAW_017344	-2.28633	0.00760448	0.0513436	--
FAW_009689	-0.921805	0.00761824	0.0514004	Pls3
FAW_018102	-2.36522	0.00764296	0.051459	--
FAW_019114	1.25457	0.00768857	0.0516577	--
FAW_021906	-1.48981	0.00772053	0.0518347	SOCS7
FAW_011894	3.34211	0.00772567	0.0518347	--
FAW_015340	7.80305	0.00775171	1	orb2
FAW_007441	12.2208	0.00775825	1	ttll6
FAW_003605	1.36184	0.00775901	0.0519676	GIP
FAW_009850	2.11794	0.00776168	0.0519676	--
FAW_007458	1.37428	0.0078725	0.0526067	ft
FAW_016575	-0.994248	0.00787738	0.0526067	mdh
FAW_010980	1.24542	0.00788977	0.0526067	liph
FAW_011386	1.64542	0.00789073	0.0526067	--
FAW_023084	-0.852443	0.00789954	0.0526067	--
FAW_015312	-0.763428	0.00790701	0.0526114	FAP
FAW_001210	1.24947	0.00793291	0.0527473	RLBP1
FAW_002130	1.44126	0.00793981	0.0527567	AMT
FAW_007781	3.13345	0.00798422	0.0529058	Tnk2
FAW_002058	-3.0831	0.00799925	0.0529689	--
FAW_020495	2.05461	0.00803675	0.0531807	PNLIPRP2
FAW_010284	-0.627702	0.00812519	0.0535838	Cirl
FAW_017251	1.45943	0.00812656	0.0535838	PIG-B
MSTRG.11595	1.04876	0.00812981	0.0535838	VHA26
FAW_002373	1.60754	0.00813107	0.0535838	GILT1
FAW_012411	-1.08657	0.00821335	0.054052	bab2
FAW_020298	1.68382	0.00823608	0.0541646	pol
FAW_007620	8.72565	0.00825042	1	APY
FAW_004428	-1.34204	0.00826297	0.0542894	--
FAW_007628	-2.52199	0.00826633	0.0542894	CA7
MSTRG.8216	2.59928	0.00831882	0.0545642	RSF1
FAW_006009	1.03812	0.00832388	0.0545642	--
FAW_012393	-1.04146	0.00832518	0.0545642	Dok2
FAW_001499	-1.08332	0.00834572	0.0546616	CPIJ001717
FAW_008687	1.30421	0.00838847	0.0548492	--
FAW_014560	1.53296	0.00839684	0.0548492	Acy1
FAW_010009	-2.78002	0.00839715	0.0548492	TBC1D5
FAW_019298	-1.15176	0.00844901	0.0550943	lfe-2
FAW_002645	1.16223	0.00846166	0.0550943	Rusc2
FAW_004995	2.00311	0.00846259	0.0550943	TMEM14C
FAW_017915	1.13516	0.00846327	0.0550943	--
FAW_005457	-4.40599	0.00848245	1	--
FAW_020963	-0.702456	0.00849624	0.0552715	--
FAW_002010	1.45038	0.00850244	0.0552745	Lrit2
FAW_008619	2.38252	0.00855174	0.0555575	pol
FAW_014725	1.38392	0.00856452	0.055603	chtf18
MSTRG.12988	1.04661	0.0085782	0.0556081	stx
FAW_011297	-0.709774	0.00857865	0.0556081	atp6v1c1a
FAW_003441	-0.920383	0.00858264	0.0556081	pol
FAW_001077	-2.54781	0.00859921	1	--
FAW_010833	-7.86625	0.00860072	1	Alp-m
FAW_016589	-9.82443	0.00860072	1	--
FAW_009180	-3.06956	0.00862302	0.0557946	SLC17A5
FAW_002931	-0.921728	0.00863476	0.0558331	AGO2
FAW_005843	-1.01475	0.00867934	0.0560572	spz4
FAW_016019	-1.07774	0.00868107	0.0560572	--
FAW_018211	2.87006	0.0087285	0.0562848	SERPINB4
FAW_009673	1.9653	0.00873384	0.0562848	--
FAW_015071	1.2893	0.00876725	0.0564384	mbt
FAW_015549	1.61679	0.00876941	0.0564384	--
FAW_012671	4.02237	0.00878226	1	--
FAW_009241	1.23548	0.00882474	0.0566307	Btbd7
FAW_001673	1.14559	0.00883388	0.0566307	gek
FAW_006396	-1.39144	0.00884926	0.0566871	--
FAW_011833	1.59627	0.00887582	0.0568194	Elmo1
FAW_015965	1.20293	0.00889069	0.0568472	Cyt-b5
FAW_019517	1.16975	0.00889196	0.0568472	--
FAW_002557	-1.93074	0.00890395	0.0568483	--
FAW_018224	-1.96949	0.00891676	0.0568923	mxt
FAW_016633	1.33142	0.00892961	0.0569366	--
FAW_014940	1.48329	0.00894531	0.056999	spen
FAW_016832	1.16255	0.00898603	0.0572206	LCP30
FAW_017139	1.57569	0.00899337	0.0572294	Tf2-12
FAW_010200	1.11919	0.00902915	0.0573959	SPR
FAW_017586	1.25524	0.00903212	0.0573959	--
FAW_001469	1.36801	0.0090374	0.0573959	HR3
FAW_020690	-1.52135	0.00904465	0.057404	--
FAW_015468	2.29379	0.00911437	0.0577703	--
FAW_014988	-0.861443	0.00914513	0.0578952	Far1
FAW_001092	-1.90288	0.00915895	0.0579385	--
FAW_016043	-0.763155	0.00916697	0.0579511	if
FAW_011152	1.38576	0.00920265	0.0581004	STK40
FAW_007220	1.00683	0.00921703	0.0581531	--
FAW_010983	1.14657	0.00926817	0.0584374	Sv2b
FAW_018173	2.09156	0.00930511	0.0586319	cher
FAW_001787	-2.15225	0.00933987	1	INV
FAW_020784	2.33856	0.00937076	0.0589499	--
FAW_005200	-2.58524	0.00937394	0.0589499	Pip4k2b
FAW_004336	-1.89772	0.00940779	0.0591242	Ttpa
FAW_012645	1.22004	0.00946113	0.0593818	pes
FAW_006547	2.97215	0.00949059	0.059528	--
FAW_002066	1.74474	0.00954376	0.0598225	--
FAW_002152	1.11315	0.00957113	0.059955	--
FAW_020523	-1.34274	0.00963469	0.0601965	ple
FAW_014697	1.00074	0.00968636	0.06048	Mal-B1
FAW_011197	-1.42283	0.00973104	0.060711	pol
FAW_002967	-2.90313	0.00973596	0.060711	CEL
FAW_010063	1.19548	0.00974532	0.0607301	Mlp84B
FAW_006426	-0.727486	0.00975327	0.0607403	--
FAW_010925	1.43367	0.00978988	0.0608502	Iyd
FAW_015802	-0.601776	0.00981711	0.0609801	Tret1
FAW_007545	1.09088	0.00984544	0.0611167	AAEL010968
MSTRG.682	-1.28978	0.00989071	0.0612922	--
FAW_000659	-0.768737	0.00989283	0.0612922	DIS3L2
FAW_008192	1.34738	0.00990789	0.0613461	IPMK
FAW_007517	1.58874	0.00992964	0.0614018	Madm
FAW_018216	-0.710142	0.00999786	0.0617443	NUAK1
FAW_020674	4.05387	0.0100361	0.0619008	B1
FAW_005238	1.21599	0.0100477	0.0619094	wdr24
FAW_010442	1.25775	0.0100541	0.0619094	LHFPL3
FAW_008602	4.11755	0.0100567	0.0619094	sem-2
FAW_011028	1.04527	0.0100959	0.0620388	se
FAW_000044	-0.899288	0.0101134	0.0620997	Gld
FAW_019381	2.63201	0.0101219	0.0621117	--
FAW_014318	-1.34125	0.0101798	0.0623479	Hil
FAW_022818	-0.647539	0.0102418	0.0626168	Cpa2
FAW_002045	2.44915	0.0102432	0.0626168	pat-3
FAW_013250	1.68419	0.0102591	0.0626744	--
FAW_017440	1.4303	0.0103032	0.0629006	--
FAW_001382	-1.6672	0.0103137	0.0629006	--
FAW_006280	-0.77422	0.0103157	0.0629006	Aldh18a1
FAW_004303	7.69116	0.0103701	1	CES5A
FAW_007558	-1.41901	0.0104446	0.0635765	CG6073
FAW_016175	1.19152	0.0104454	0.0635765	--
FAW_003406	1.21172	0.0104464	0.0635765	ATAD5
FAW_020374	-3.71049	0.010469	1	FOXP1
FAW_011103	2.68551	0.0104873	0.0637594	bun
FAW_012450	1.29703	0.0104897	0.0637594	--
FAW_014656	-2.07178	0.0105252	0.0638947	TTLL3A
FAW_018054	2.52051	0.010549	0.0639601	allc
FAW_015416	1.2522	0.0106307	0.0642918	Glis1
FAW_016015	2.16502	0.0106619	0.0644396	--
FAW_002068	1.61642	0.0107001	0.0645761	Chd7
FAW_005236	-1.54774	0.0107502	0.0648111	--
FAW_003376	-1.47144	0.0107715	0.0648984	--
FAW_013116	1.88808	0.0107788	0.0649022	spred1
FAW_017041	-2.35348	0.010792	0.0649406	CHIT1
FAW_009641	1.81104	0.0108372	0.0650977	AGAP005532
FAW_007072	-0.76059	0.0108895	0.0653643	--
FAW_015530	1.15593	0.0109025	0.0653756	PIF1
FAW_010251	1.60471	0.010905	0.0653756	X-element\ORF2
FAW_001855	1.06822	0.0109396	0.0655124	ELOVL6
FAW_015615	-1.92077	0.0109416	0.0655124	CG12056
FAW_001700	-1.99472	0.0109482	0.0655124	--
FAW_015238	1.81343	0.0109695	0.0655989	APOD
FAW_000227	-3.63743	0.0109891	1	--
MSTRG.15023	1.23535	0.0110546	0.0660668	Hmcn2
FAW_005899	-0.603591	0.0110957	0.0662714	Src42A
FAW_022281	-2.59533	0.0111312	0.0663189	Ces2a
FAW_012736	1.47264	0.0111348	0.0663189	CECR2
FAW_011345	-1.61185	0.0111427	0.0663189	--
FAW_018082	1.63644	0.011145	0.0663189	TMPRSS15
FAW_021857	3.14169	0.0111959	0.0665462	--
FAW_002934	-0.893482	0.011197	0.0665462	--
FAW_015425	1.54916	0.0112068	0.0665634	--
FAW_010890	-0.801844	0.0112252	0.0666316	Tsp2A
FAW_004340	-2.078	0.0112357	0.0666529	CarT
FAW_017629	2.76126	0.0113003	0.0669555	rcc1
FAW_009585	1.39063	0.0113006	0.0669555	Mp20
FAW_008605	-2.6314	0.0113119	0.0669809	l(1)sc
FAW_014949	1.56117	0.0113385	0.0670973	--
FAW_001124	-2.45891	0.0113569	0.067165	Trim9
FAW_011697	-0.638936	0.0113696	0.0671984	--
FAW_004763	-0.926386	0.0113906	0.0672401	GIP
FAW_019750	1.06958	0.0114146	0.0672991	--
FAW_021856	-1.79008	0.0114539	0.0674899	CarT
FAW_000699	-0.684597	0.011462	0.0674961	Nup154
FAW_003454	1.71417	0.0114729	0.0675189	AADAT
FAW_004552	1.92418	0.011489	0.0675727	--
FAW_020730	-1.16086	0.0115537	0.0679116	--
FAW_008839	1.64916	0.0115934	0.0680615	--
FAW_011441	1.11536	0.0116016	0.0680686	AGPAT2
FAW_021450	1.79735	0.0116391	0.0682299	SLC4A2
FAW_005436	2.03325	0.0116433	0.0682299	--
FAW_012282	1.58157	0.0116526	0.0682429	Ca3
FAW_005661	1.67604	0.0116745	0.0683293	SERINC1
FAW_000308	1.4809	0.011685	0.0683336	Tollo
FAW_001489	2.61353	0.0117161	0.0683706	Ttll5
MSTRG.12964	-2.09075	0.0117241	0.0683706	--
FAW_005041	1.35758	0.0117768	0.0685535	--
FAW_006459	1.24321	0.0117901	0.068589	LanA
FAW_000267	-3.38631	0.0118665	0.0689503	GA15215
MSTRG.8443	2.02595	0.0119158	0.0691636	HINT2
FAW_014454	-0.723238	0.0119239	0.0691636	--
FAW_009805	-2.01451	0.0119418	0.0691793	Slc17a5
FAW_014662	1.17627	0.0119682	0.0692901	--
FAW_021262	1.3037	0.0119992	0.069428	--
FAW_006004	1.12613	0.0120201	0.0695072	--
MSTRG.14980	-1.05692	0.012046	0.0696151	CG5009
FAW_004468	1.17424	0.0121344	0.0700842	Orct
FAW_009548	-1.02578	0.0121451	0.0701039	Cyt-b5-r
FAW_005881	1.28929	0.0122059	0.0704092	slc25a35
FAW_011892	3.05889	0.0122296	0.0704649	--
FAW_020223	3.21319	0.0122456	0.0705146	--
FAW_007825	1.68158	0.0122674	0.0705981	--
FAW_006174	2.13281	0.012277	0.0706108	--
FAW_019110	2.71464	0.0123529	0.0710051	salm
FAW_015787	-0.589445	0.012367	0.0710123	ZNF622
FAW_011001	1.08744	0.0123839	0.0710562	--
FAW_019396	3.42178	0.0124015	1	--
FAW_019099	2.79951	0.0124044	0.0711311	PGRP
FAW_000244	1.23088	0.0124147	0.071148	--
MSTRG.8798	-1.88579	0.0124408	0.0712551	Lip1
FAW_011084	-3.32193	0.0125034	1	Coq10
FAW_005512	-0.689136	0.0125088	0.0715586	--
FAW_022750	2.16337	0.0125161	0.0715586	--
FAW_015964	1.0051	0.0125632	0.0717526	pol
FAW_003746	1.85677	0.0125649	0.0717526	--
FAW_019066	1.45904	0.0125773	0.0717808	Appl
FAW_018823	2.00616	0.0125904	0.0718131	EcR
FAW_017916	-0.736966	0.0126549	0.0720954	Pdss2
FAW_012358	2.67081	0.0126981	0.0722041	SOAT1
FAW_004769	2.92136	0.0126984	0.0722041	Nphs1
FAW_021735	-1.06413	0.0127031	0.0722041	RNF181
FAW_004485	1.52652	0.012704	0.0722041	InR
FAW_005038	4.11151	0.0127587	1	--
FAW_002023	1.25546	0.0127665	0.0725166	ck
FAW_017346	-1.86277	0.0127743	0.0725185	ST5
FAW_019656	-1.05973	0.0127934	0.0725839	--
FAW_001438	-1.91427	0.0128069	0.0726178	--
FAW_006981	-2.73938	0.0128912	0.0730094	ITFG1
FAW_006933	1.13027	0.012921	0.0731353	PPAF1
FAW_001837	-1.77765	0.0129359	0.0731766	Ik
FAW_005747	1.2124	0.012944	0.0731793	--
FAW_018566	3.42742	0.012976	0.0732861	mec-2
FAW_005064	1.21966	0.0130291	0.0734882	--
FAW_018433	1.55097	0.0131026	0.0738276	--
FAW_012015	-0.703422	0.0131046	0.0738276	Ano4
FAW_004254	1.96716	0.0131307	0.0739258	--
FAW_008285	1.22307	0.0131374	0.0739258	Cela2a
FAW_015419	1.27418	0.0131983	0.0742251	kay
MSTRG.6682	1.24851	0.0132076	0.074234	DOCK9
FAW_012518	-0.872696	0.0132408	0.0743336	Gld
FAW_017954	-1.75606	0.0132528	0.0743341	CMIP
FAW_005809	7.90689	0.0132708	1	--
FAW_012333	1.12831	0.0132741	0.0743896	jockey\pol
FAW_014713	1.0367	0.013284	0.0743896	DDB_G0273589
FAW_014754	-2.96743	0.0132894	0.0743896	BTAF1
FAW_006472	1.54494	0.0133334	0.0745929	DPP10
MSTRG.10359	-0.586751	0.0133439	0.074608	GIP
FAW_005378	-2.15697	0.0133587	1	NPFR
FAW_021567	2.59254	0.0133929	0.0747952	Spon1
FAW_014873	-0.956184	0.0134247	0.0748613	mariner\T
FAW_014334	1.2721	0.0134281	0.0748613	AGAP002721
FAW_006777	1.31652	0.0134485	0.0749319	pol
FAW_017450	-0.679924	0.0135149	0.0751712	pol
FAW_014383	-1.46642	0.013532	0.0751795	--
FAW_010252	1.40975	0.0135751	0.0753021	--
FAW_007780	2.82964	0.0135854	0.0753021	PXN
FAW_005908	1.72387	0.0136319	0.0755165	Pde6
FAW_021144	1.54406	0.0136495	0.0755462	--
FAW_011141	-1.22796	0.0136529	0.0755462	--
MSTRG.7137	-2.34723	0.013682	0.0756636	Stard13
FAW_011393	1.45701	0.0137359	0.0759181	lid
FAW_010221	-9.80305	0.0137412	1	Mmp10
FAW_001810	1.11164	0.0137877	0.0760579	--
FAW_000557	-10.5118	0.0137922	1	Kmt2e
FAW_006407	1.00613	0.0138052	0.0760579	pyx
FAW_010229	1.27192	0.0138086	0.0760579	--
FAW_003010	4.85429	0.0138876	1	--
FAW_001742	1.35808	0.0139605	0.0766755	ex
FAW_000720	1.24252	0.0139965	0.0768291	--
FAW_014935	1.15846	0.0140125	0.0768733	--
FAW_006458	-0.636902	0.0140262	0.0769043	B3GNT2
FAW_000871	1.52173	0.0140525	0.0770049	EbpIII
FAW_021304	3.13281	0.0141212	0.0772495	TY3B-I
FAW_012468	-1.32707	0.0141601	0.0774184	Pgam5
MSTRG.12874	3.21917	0.014201	0.077466	--
FAW_003448	1.2146	0.014223	0.0775247	Racgap1
FAW_004412	1.38097	0.014234	0.0775247	--
FAW_018104	-1.59517	0.0142359	0.0775247	--
FAW_003485	2.25014	0.0142752	0.0776946	ATP9B
FAW_015798	1.15611	0.0143546	0.0779944	arm
FAW_009921	2.10303	0.0143684	0.0780253	Dpp4
FAW_006337	1.74272	0.0143805	0.0780472	--
FAW_000722	1.3932	0.0143966	0.0780804	ck
FAW_014966	3.19206	0.0144029	0.0780804	--
FAW_014504	-2.58496	0.0144565	0.0783268	CPT2
FAW_021508	1.88572	0.0145261	0.0785743	--
FAW_010130	1.45921	0.0145266	0.0785743	HMGR
FAW_006002	1.28248	0.014571	0.0787389	tw
FAW_021884	2.84279	0.0145898	0.0787393	EPC1
FAW_006960	-1.90442	0.0146184	0.0788492	jockey\pol
FAW_017196	-2.23704	0.0146503	0.078933	sfl
FAW_009489	-1.48072	0.0146712	0.0789942	--
FAW_019152	2.58496	0.0146991	0.0790633	--
FAW_000686	4.18057	0.0147202	1	Trex2
FAW_000398	-1.20086	0.0147405	0.0792413	Pli
FAW_015075	2.91059	0.0147754	0.0793848	--
FAW_007896	1.66906	0.0148796	0.0798553	MYORG
FAW_019812	-0.803515	0.0149057	0.0799509	--
FAW_015244	1.25698	0.0149185	0.0799751	spg21
FAW_003402	1.22313	0.0149458	0.0800768	--
FAW_001900	2.05872	0.0150132	0.0803931	Ccp84Ab
FAW_019528	-1.39548	0.0150541	0.0805677	AAEL003481
FAW_018193	1.47926	0.0150688	0.0806016	--
FAW_001592	-10.2487	0.0150857	1	HIGD1B
FAW_019410	-0.753839	0.0151509	0.0809239	Herc4
FAW_004697	1.51449	0.0151543	0.0809239	Capr
FAW_006401	1.14461	0.0151789	0.0810101	--
FAW_018561	1.95164	0.0153185	0.0816193	LCT
FAW_000959	-2.70232	0.0154262	0.0820569	rsbn1l
FAW_003573	1.55051	0.0154511	0.082129	TJP1
FAW_004368	1.25544	0.0154568	0.082129	Hsp68
FAW_003797	1.41977	0.0155285	0.0824228	Tret1-2
FAW_020249	1.94642	0.015532	0.0824228	--
FAW_014938	1.15966	0.0155378	0.0824228	--
FAW_007164	1.57014	0.0156128	0.0827752	Smug1
FAW_003751	1.4649	0.0156334	0.0827933	Inpp5k
FAW_010208	1.23646	0.0157525	0.0832867	--
FAW_021425	1.18293	0.0157777	0.0833742	Cpa5
FAW_014841	3.24793	0.0157857	1	--
FAW_018732	1.43182	0.015805	0.0834001	--
MSTRG.17294	-2.39457	0.0158086	0.0834001	chmp2b
FAW_004986	1.27305	0.0158651	0.0836526	--
FAW_006661	-1.40426	0.0158892	0.0837333	Samui
FAW_010654	1.67254	0.015919	0.0838176	COL15A1
FAW_003860	1.15206	0.0159226	0.0838176	NUP88
FAW_011769	1.19555	0.0159386	0.0838397	METTL16
FAW_008910	-0.673615	0.0159442	0.0838397	Nup62
FAW_009755	2.87235	0.0159824	1	Sb
FAW_013070	0.976961	0.0161246	0.0845114	Hyal1
FAW_011514	-1.02743	0.0161989	0.084754	--
FAW_020846	1.51548	0.0162149	0.084754	--
FAW_007710	-2.77083	0.0162349	1	Fur1
FAW_022381	-1.41504	0.016236	0.0848183	ATG2A
FAW_016964	1.25327	0.0162799	0.0850014	TBC1D23
FAW_002063	-1.18802	0.0163466	0.0853035	LAMC3
FAW_015090	-0.942976	0.0163592	0.0853233	CG32486
FAW_007397	1.03075	0.016425	0.0855007	FASN
FAW_004511	1.11614	0.0164288	0.0855007	--
FAW_004733	1.07683	0.0164737	0.085642	Pka-C3
FAW_000572	1.45488	0.0165139	0.0857364	pif1
FAW_006955	11.4952	0.0165178	0.0857364	PNLIPRP2
FAW_006745	1.07827	0.0165186	0.0857364	Spon2
FAW_001501	1.17172	0.0165473	0.0858394	Adamts7
FAW_001486	1.83304	0.0165917	0.0859771	pol
FAW_000574	-3.33628	0.0166293	1	--
FAW_008012	1.81381	0.0166318	0.0861063	BICDL1
FAW_001601	1.02678	0.0166346	0.0861063	B1
FAW_011067	3.09115	0.0166687	0.0862368	SLC22A7
FAW_000972	-2.81086	0.0167194	0.0864367	--
FAW_016144	4.0527	0.0167253	0.0864367	--
FAW_009250	1.57572	0.0167448	0.086491	CHYM2
FAW_008504	3.73718	0.016848	0.0867913	WDR59
FAW_011338	-1.93907	0.0168849	0.0869158	acsbg2
FAW_001934	1.75926	0.0168959	0.0869158	--
FAW_006404	-0.657498	0.0168993	0.0869158	--
FAW_002972	1.00521	0.0169455	0.0871068	Ptpn4
FAW_017679	-1.71706	0.0169689	0.0871149	--
FAW_011164	1.6384	0.0169742	0.0871149	Tret1
FAW_003771	1.76867	0.0170614	0.0874225	--
FAW_000890	2.77961	0.0170884	0.0875142	--
FAW_010958	-0.970172	0.0171734	0.0878565	4cl1
FAW_010447	2.78598	0.0171907	0.0878983	nemp1a
FAW_019111	2.44867	0.0172345	0.0880286	--
FAW_009646	1.50298	0.017249	0.0880557	HECW2
FAW_011518	-1.04023	0.0172715	0.0881242	jockey\pol
FAW_020032	8.61961	0.0173043	0.088198	Slc7a6
MSTRG.16598	1.04749	0.0173265	0.088212	SELENOI
FAW_015614	1.34272	0.0173346	0.088212	--
FAW_003748	-3.21895	0.0173648	0.0883191	DDX43
FAW_012119	-0.723164	0.0173745	0.088322	SOCS4
FAW_000374	-3.43399	0.0174031	1	Trim37
FAW_003874	1.14284	0.017536	0.089096	Ccp84Ab
FAW_020085	-1.64558	0.017578	0.0892623	--
FAW_000105	-1.52763	0.0176023	0.0893201	--
FAW_008609	3.14343	0.0176762	0.0895721	CG11899
FAW_003800	9.36632	0.0177236	1	Ankle2
FAW_004574	1.62844	0.0177259	0.0896822	Lip1
FAW_012670	2.06919	0.0177771	0.0898941	--
FAW_018495	-0.6602	0.0178235	0.0899853	Akap1
FAW_020015	-1.0344	0.0178333	0.0899853	--
FAW_004728	1.44961	0.0178425	0.0899853
FAW_000943	1.85681	0.0178513	0.0899853
FAW_010812	1.89053	0.0179024	0.0901487
FAW_010022	1.0812	0.0179651	0.0904174
FAW_007991	2.0124	0.0179788	0.0904387
FAW_003086	4.99247	0.0179941	1
FAW_006905	-1.02008	0.0180126	0.0905464
FAW_001751	-1.58694	0.0180351	0.0905464
FAW_004658	-1.53979	0.0180378	0.0905464
FAW_008590	1.17378	0.0180635	0.090628
FAW_014786	1.35655	0.018089	0.0906499
MSTRG.12966	-1.66678	0.0181012	0.0906499
FAW_011993	-1.22842	0.0181044	0.0906499
FAW_007609	0.962438	0.0181116	0.0906499
FAW_000338	-0.952275	0.0181149	0.0906499
FAW_009093	-2.09045	0.0182047	0.0910516
MSTRG.13687	1.46254	0.018302	0.0914909
FAW_013074	-0.696132	0.0184021	0.0918319
FAW_023050	-1.01465	0.0184084	0.0918319
FAW_015677	4.06301	0.0184699	1
FAW_009024	2.53557	0.018507	0.0922234
FAW_003306	-1.15942	0.0185087	0.0922234
FAW_012913	1.07669	0.0185156	0.0922234
FAW_007412	-0.648956	0.0185425	0.0923009
FAW_019279	2.15143	0.0185503	0.0923009
FAW_012777	3.88792	0.0185641	0.0923218
FAW_009717	1.41433	0.0185953	0.0924101
FAW_020011	1.49426	0.018601	0.0924101
FAW_021973	2.34665	0.0186541	0.0926214
FAW_018308	1.28089	0.0186628	0.0926214
FAW_020684	1.40952	0.0187155	0.0927871
FAW_015722	-1.53418	0.0187647	0.0929835
FAW_003179	1.54823	0.0187858	0.0930401
FAW_007477	4.3356	0.0188642	0.0933323
FAW_002379	1.5229	0.01888	0.0933625
FAW_022767	-2.88753	0.0188812	1
FAW_018373	1.02281	0.0189474	0.0935994
FAW_013170	2.67704	0.0191411	0.094331
FAW_022869	1.18718	0.0191433	0.094331
FAW_013219	-1.14328	0.0191828	0.0944236
FAW_014505	-1.50104	0.0192168	0.0945425
FAW_017504	-0.620942	0.0192346	0.0945814
FAW_012966	-0.592067	0.019259	0.094638
FAW_011370	1.39717	0.0193008	0.0947618
FAW_015401	-0.921208	0.0193522	0.0949661
MSTRG.8508	-1.26532	0.0195537	0.0957561
FAW_020851	-1.15423	0.0195829	0.0957561
FAW_007503	1.18445	0.0197151	0.0963539
FAW_003476	1.5964	0.0197425	0.0963665
FAW_017974	1.77659	0.0197477	0.0963665
FAW_019693	0.911702	0.019768	0.0963675
FAW_002835	1.669	0.0197834	0.0963942
FAW_003411	1.91081	0.0198003	0.0964277
FAW_019138	3.8413	0.0198145	1
FAW_000207	1.21586	0.0198726	0.0966819
FAW_011635	1.13484	0.0199078	0.0968043
FAW_005821	-2.08897	0.019944	0.0968337
FAW_000475	-0.754722	0.0200626	0.0972623
FAW_007903	1.44345	0.0200935	0.0973281
FAW_013024	1.25475	0.0200964	0.0973281
FAW_005961	2.10492	0.0201567	0.097571
FAW_006712	1.30424	0.0201796	0.0976326
FAW_004549	1.11129	0.0202585	0.097965
FAW_008232	1.59734	0.020287	0.0980538
FAW_015580	1.57167	0.0203204	0.0981661
FAW_006451	1.19531	0.0203828	0.0983686
FAW_019362	-1.78587	0.0204139	0.0984204
FAW_003202	-0.975099	0.0204658	0.0985927
FAW_015950	1.81349	0.0204702	0.0985927
FAW_005672	2.45545	0.0204804	0.0985927
FAW_014577	1.45452	0.020495	0.0986135
FAW_005576	1.13682	0.0205274	0.09872
FAW_017255	-2.25376	0.0206124	1
FAW_003790	-0.617373	0.0206663	0.099091
FAW_020273	1.22033	0.0207033	0.0991715
FAW_005907	-1.3015	0.0207181	0.0991715
FAW_022396	-1.3525	0.0207257	0.0991715
FAW_007338	2.43571	0.0207283	0.0991715
FAW_006012	-1.13115	0.0207345	0.0991715
FAW_022424	2.85261	0.0207451	0.0991725
FAW_011143	-1.26031	0.0208318	0.099439
FAW_007737	1.28548	0.0208501	0.0994694
FAW_014514	1.56635	0.0208588	0.0994694
FAW_019370	-0.690389	0.0208817	0.099526
FAW_004259	1.19556	0.0209419	0.0997174
FAW_004387	-1.05243	0.0209557	0.099734
FAW_022753	1.65754	0.0210194	0.0999324
FAW_002992	3.57633	0.0210271	0.0999324
FAW_012544	0.995268	0.0210288	0.0999324
FAW_001442	-1.04464	0.0210389	0.0999324
FAW_007784	4.73954	0.0211502	0.100409
FAW_003815	1.47743	0.0211776	0.100409
FAW_015375	-1.10692	0.021181	0.100409
FAW_013231	-2.42755	0.0211954	0.100428
FAW_020116	-1.34573	0.0212106	0.10045
FAW_014880	-0.963175	0.0212995	0.100803
FAW_017278	1.77581	0.0213059	0.100803
FAW_009060	-0.825971	0.0213624	0.10102
MSTRG.14425	3.05166	0.0213874	0.101089
FAW_021115	1.14828	0.0214491	0.101272
FAW_010195	-0.601335	0.021472	0.101272
FAW_011134	3.63717	0.0214773	0.101272
FAW_015136	-0.699039	0.0216037	0.101761
FAW_006361	7.51833	0.021623	1
FAW_001003	1.15693	0.0216683	0.101913
FAW_011520	-1.04177	0.0216776	0.101913
FAW_014517	-1.63823	0.0216874	0.101913
FAW_009658	1.23312	0.0217014	0.101913
FAW_014646	0.899687	0.02171	0.101913
FAW_007344	-1.6785	0.021749	0.102047
FAW_015007	1.71333	0.0218711	0.10242
FAW_021574	1.10954	0.021885	0.102435
FAW_013028	-3.31253	0.021942	0.102556
FAW_011968	1.44713	0.0219428	0.102556
FAW_001249	3.61928	0.0219579	0.102577
FAW_003599	1.05723	0.0220497	0.102916
FAW_019726	1.67115	0.0220519	0.102916
FAW_011504	1.37135	0.0221573	0.103349
FAW_017438	1.43821	0.0221661	0.103349
FAW_012874	0.928735	0.0221929	0.103405
FAW_018133	1.26218	0.0222072	0.103405
FAW_005046	1.17666	0.0222248	0.103422
FAW_014305	1.27582	0.0222471	0.103476
MSTRG.2938	1.72027	0.0223094	0.103716
FAW_022164	1.91576	0.0223522	0.103865
FAW_017639	1.23645	0.022437	0.104041
FAW_002706	-0.702862	0.0224443	0.104041
FAW_010156	-1.15701	0.0225326	0.1044
FAW_009163	-1.89464	0.0226063	0.104692
FAW_002183	1.36831	0.0226386	0.104791
FAW_003286	1.46056	0.02265	0.104793
FAW_015852	1.59813	0.0226688	0.10483
FAW_009531	1.38872	0.0226963	0.104906
FAW_011483	0.958328	0.0227441	0.105074
FAW_000470	1.32904	0.0227599	0.105074
FAW_018516	7.64386	0.0227659	1
FAW_012618	1.69532	0.0228708	0.105409
FAW_019321	2.01242	0.0228918	0.105456
FAW_014381	-1.65691	0.022907	0.105475
FAW_004868	-0.886621	0.0229362	0.105559
FAW_019096	1.91523	0.0230796	0.106149
MSTRG.12917	-2.02206	0.0232247	0.106683
FAW_008250	-1.04317	0.0232366	0.106687
FAW_009645	1.15968	0.0232575	0.106732
FAW_001146	0.94907	0.0232743	0.106735
FAW_005199	-2.55684	0.0232804	0.106735
FAW_003624	-4.16993	0.023291	1
FAW_007009	-4.16993	0.023291	1
FAW_008175	-4.16993	0.023291	1
FAW_010235	-4.16993	0.023291	1
FAW_012790	-4.16993	0.023291	1
FAW_020144	-4.16993	0.023291	1
FAW_021087	-4.16993	0.023291	1
FAW_018410	1.23822	0.0232966	0.106759
FAW_010211	1.05485	0.0233677	0.106982
FAW_000758	1.07103	0.0233891	0.10703
FAW_012147	-2.16784	0.0235068	0.107413
FAW_000465	1.70577	0.0235675	0.107539
FAW_011583	2.61386	0.0235796	0.107544
FAW_006079	1.8464	0.0236237	0.107603
FAW_011332	-1.70535	0.0236261	0.107603
FAW_019907	1.67762	0.0236772	0.107785
FAW_001027	1.89772	0.0237179	0.107878
FAW_023091	-2.56071	0.0237405	0.107919
FAW_010887	2.45139	0.0237688	0.107997
FAW_019363	1.86371	0.0238017	0.108096
FAW_000222	1.56463	0.0238738	0.108347
FAW_022200	-1.12371	0.0239045	0.108347
FAW_005343	2.64075	0.0239074	0.108347
FAW_019707	2.29065	0.0239134	0.108347
FAW_008492	1.05062	0.0239591	0.108503
FAW_017348	-1.34424	0.0239951	0.108615
FAW_000700	1.47046	0.0240076	0.108621
FAW_003786	0.881916	0.0240613	0.108813
FAW_009452	5.09592	0.0241169	0.109013
FAW_017689	0.950333	0.024168	0.109193
FAW_019813	-1.4018	0.0241928	0.109253
FAW_002047	1.36678	0.0243126	0.109589
FAW_004875	3.14975	0.024334	1
FAW_006974	2.77346	0.0243616	0.109663
FAW_012519	2.17688	0.024366	0.109663
FAW_021551	-1.0008	0.0243796	0.109663
FAW_003140	2.3735	0.0243861	0.109663
FAW_007657	-1.54934	0.0244222	0.109723
FAW_019000	-0.692202	0.0244503	0.109798
FAW_020224	3.71591	0.0244779	0.109857
MSTRG.15896	2.16386	0.0244861	0.109857
FAW_003252	4.12928	0.024514	1
FAW_009582	1.79158	0.0245343	0.110021
FAW_018079	1.64843	0.0245816	0.110131
FAW_003311	-1.86775	0.0246133	1
FAW_007528	-3.01381	0.0246191	1
FAW_014624	-0.636332	0.0246578	0.110421
FAW_007952	1.39568	0.0246772	0.110457
FAW_001914	-0.735999	0.024709	0.110548
FAW_003600	1.23138	0.0247608	0.110728
FAW_020508	1.82995	0.0248109	0.1109
FAW_000800	-0.858916	0.0248408	0.110931
FAW_022162	-0.942247	0.0249254	0.111187
MSTRG.4206	1.0281	0.0249382	0.111187
FAW_016413	1.6705	0.0249699	0.111198
FAW_011673	2.35199	0.0249956	0.111261
FAW_011456	2.2735	0.0251011	0.111679
FAW_016859	1.37798	0.0251619	0.111898
FAW_006882	-1.53605	0.0251736	1
MSTRG.11902	2.89426	0.0252322	0.112107
FAW_010804	0.926726	0.0252447	0.112111
FAW_001480	1.32193	0.0252738	0.112158
FAW_000129	1.20682	0.0253063	0.112229
FAW_011375	2.6324	0.0254165	0.112562
FAW_002061	4.28322	0.025481	0.112744
FAW_021078	1.93989	0.0255479	0.112936
FAW_007361	2.6746	0.0256277	0.113155
FAW_003524	1.22175	0.0256327	0.113155
FAW_002699	1.05332	0.0256661	0.113251
FAW_001649	3.10038	0.0256815	0.113267
FAW_015554	-0.602946	0.0257041	0.113273
FAW_006720	-1.21213	0.0257181	0.113273
MSTRG.6284	-0.997508	0.0257424	0.113328
MSTRG.7191	2.10042	0.0257748	0.113405
FAW_000310	1.27788	0.0257835	0.113405
FAW_019004	1.03122	0.0258066	0.113455
FAW_014840	1.17954	0.025843	0.113511
MSTRG.7272	2.03838	0.0259262	0.113825
FAW_007112	1.2105	0.0259538	0.113894
FAW_002834	0.90519	0.0260262	0.11416
FAW_019007	4.14101	0.0264072	1
MSTRG.16630	-1.31397	0.0264302	0.115721
FAW_016876	0.985276	0.0265328	0.116037
FAW_020380	2.95646	0.0265339	0.116037
FAW_000318	1.00876	0.0265387	0.116037
FAW_014891	1.05066	0.0265609	0.116082
FAW_015999	2.79069	0.0265799	0.116112
FAW_019309	-0.907253	0.0266926	0.116456
FAW_009698	2.05357	0.0266949	0.116456
FAW_010247	1.45312	0.0268736	0.117076
FAW_009279	-1.40832	0.0268988	0.117133
FAW_021063	1.86441	0.0269323	0.117226
FAW_011999	-1.30983	0.0270544	0.117645
FAW_010238	1.13341	0.0270672	0.117645
FAW_000898	1.95506	0.0270821	0.117645
FAW_019399	-1.30336	0.0270885	0.117645
FAW_007779	3.13431	0.0271339	0.117784
FAW_001470	-2.13465	0.0272605	1
FAW_007625	-0.994079	0.0273561	0.118671
FAW_005923	-4.23406	0.0274013	1
FAW_006815	1.33454	0.0274064	0.118787
FAW_011647	3.34177	0.0274175	0.118787
FAW_012809	-1.6267	0.0274277	0.118787
FAW_006574	3.29735	0.0274627	0.118836
FAW_002413	9.11201	0.0275392	1
FAW_003961	-0.587677	0.0276845	0.119733
FAW_003232	1.41692	0.0277154	0.119733
FAW_006559	-1.08677	0.0277264	0.119733
FAW_012563	0.979784	0.0277266	0.119733
FAW_010174	1.20045	0.0277446	0.119733
FAW_022952	-0.600517	0.0277636	0.119762
FAW_008599	-1.84205	0.0277986	1
FAW_014317	1.2141	0.0279995	0.120617
FAW_016596	-1.63101	0.0280423	0.120747
FAW_011601	2.09351	0.0280917	0.120906
FAW_009077	-2.52421	0.0282731	0.121457
FAW_021149	1.14441	0.0283023	0.121457
FAW_014385	-1.80463	0.0283107	0.121457
FAW_022100	-2.80735	0.0283794	1
FAW_013130	0.961338	0.0284575	0.121881
FAW_006918	-1.09976	0.0285158	0.122076
FAW_018072	1.78863	0.0285546	0.122188
FAW_008162	1.93321	0.0286281	0.122343
FAW_006589	5.1375	0.028644	1
FAW_015325	-0.89724	0.028646	0.122343
FAW_007251	1.73205	0.0286522	0.122343
MSTRG.4902	-1.35389	0.0286709	0.12236
FAW_001910	1.39122	0.0287338	0.122474
FAW_022711	-1.61749	0.0287381	0.122474
FAW_004233	-2.39978	0.0287452	0.122474
FAW_008500	2.13093	0.0287487	0.122474
FAW_002736	0.945308	0.0288734	0.122944
FAW_008541	1.27323	0.0288845	0.122944
FAW_005089	-0.742043	0.0289244	0.123005
FAW_016213	3.51457	0.0290082	0.123219
FAW_005518	1.45192	0.0290429	0.123291
FAW_004136	-0.700717	0.0291574	0.123615
FAW_017437	1.10691	0.0291576	0.123615
FAW_016344	0.991571	0.0292046	0.12376
FAW_000169	1.31638	0.0292377	0.123845
FAW_022771	2.66297	0.029358	1
FAW_022653	-0.724848	0.0293773	0.124326
FAW_011074	1.33387	0.0294059	0.124339
FAW_014953	1.89965	0.0294413	0.124379
FAW_021020	1.29757	0.0294907	0.124534
FAW_001550	3.36678	0.0295061	0.124544
FAW_007238	-2.16379	0.0295617	0.124711
FAW_010179	0.946448	0.0295966	0.124711
FAW_000284	-1.74133	0.029602	0.124711
FAW_010922	0.951677	0.0296105	0.124711
FAW_003201	-1.21456	0.02964	0.124726
FAW_009341	6.26053	0.0296679	1
FAW_012925	1.39984	0.029698	0.124916
FAW_009791	2.17131	0.0297267	0.124954
FAW_002937	-1.51006	0.0297331	0.124954
FAW_021017	1.17823	0.0297942	0.125157
FAW_014718	1.12184	0.0298435	0.125309
FAW_000511	-0.708355	0.0298912	0.1254
FAW_009202	1.37446	0.0299107	0.125427
FAW_014588	1.06732	0.0299272	0.125441
FAW_006640	1.84461	0.0299958	0.12562
FAW_001329	1.40465	0.0300098	0.125624
FAW_001322	-0.66404	0.0300358	0.125678
FAW_006307	9.85071	0.0301337	1
FAW_002622	-2.44846	0.0303118	0.126723
FAW_011049	1.16185	0.0303434	0.126744
FAW_007206	1.86183	0.0303727	0.126812
FAW_016883	0.994855	0.0304396	0.126963
FAW_015133	4.18866	0.0304414	1
FAW_020961	-1.2275	0.0304485	0.126963
FAW_019758	1.35637	0.0305438	0.127305
FAW_004027	1.43672	0.0306041	0.127415
FAW_000053	1.27827	0.0306637	0.127415
FAW_002044	1.39232	0.0306664	0.127415
FAW_000535	1.09142	0.0306759	0.127415
FAW_018413	1.53048	0.0307363	0.127491
FAW_018155	0.935252	0.0307472	0.127491
FAW_020278	1.15773	0.0307915	0.127582
FAW_012413	1.58884	0.0307957	0.127582
FAW_013253	2.01325	0.0309103	0.128002
FAW_000404	1.09073	0.0309268	0.128015
FAW_019769	-0.654125	0.0309646	0.128117
FAW_009245	1.97461	0.0310887	0.12852
FAW_005410	1.40028	0.031106	0.128536
FAW_001007	1.29335	0.0311637	0.128719
FAW_002794	0.959902	0.0312301	0.128883
FAW_011994	-0.742857	0.031264	0.128968
FAW_006736	-2.03103	0.0313578	0.129299
FAW_004863	1.43972	0.0313805	0.129337
FAW_008056	2.26679	0.0313945	0.129339
FAW_007148	0.951425	0.0314953	0.129699
FAW_012398	1.64159	0.0315321	0.129795
FAW_012630	2.58375	0.0317874	0.130678
FAW_009672	1.1259	0.0318291	0.130738
FAW_003859	1.12175	0.0319298	0.131096
FAW_014664	0.9454	0.0319843	0.131264
MSTRG.4603	-1.13561	0.0320282	0.131388
FAW_001219	1.17019	0.0320843	0.131562
FAW_016201	-2.5845	0.0321252	0.131654
FAW_020934	1.1277	0.032134	0.131654
FAW_001754	1.06366	0.0322607	0.132108
FAW_015294	-1.59282	0.0322722	0.132108
FAW_007422	1.17824	0.0323345	0.132306
FAW_000958	-4.41913	0.03236	1
FAW_012377	1.34818	0.0325289	0.132989
FAW_005738	-0.588145	0.0326308	0.133292
FAW_011032	-1.58368	0.0326824	0.133446
FAW_005357	1.91319	0.0327092	0.133456
FAW_012615	1.89383	0.0328978	0.134041
FAW_003735	1.20945	0.0329143	0.134052
FAW_014947	2.44184	0.0330313	0.134415
FAW_009026	1.69767	0.0330975	0.134627
FAW_006379	1.30811	0.0331469	0.134771
FAW_008394	1.68637	0.0332185	0.135005
FAW_007433	-0.813345	0.0332361	0.13502
FAW_004212	-1.32971	0.0334293	0.13567
FAW_023021	-1.36353	0.0334332	0.13567
FAW_011078	-0.812748	0.0334525	0.13567
FAW_001114	-1.10194	0.0335027	0.135816
FAW_001835	-3.09311	0.0337411	1
FAW_008536	-2.05461	0.0338255	0.13701
FAW_018535	-3.02237	0.0339734	0.137551
FAW_011363	0.96352	0.0341147	0.138065
FAW_000173	1.26778	0.0341595	0.138072
FAW_017151	-0.680932	0.0341739	0.138072
FAW_005972	-0.876955	0.0341739	0.138072
FAW_015309	-1.85592	0.0342634	0.138327
FAW_016061	2.26492	0.0342657	0.138327
FAW_020574	-1.04513	0.0343076	0.138438
FAW_021107	1.31267	0.0343495	0.138549
FAW_010774	1.02545	0.0343692	0.138557
FAW_013027	1.45294	0.0343801	0.138557
FAW_022089	-0.910802	0.0344715	0.13876
FAW_019139	-0.775806	0.0344737	0.13876
FAW_016875	1.10761	0.0345961	0.139136
FAW_017411	4.49643	0.034602	1
FAW_002009	1.02817	0.0346242	0.139163
FAW_006331	-3.14975	0.0346319	0.139163
FAW_007473	1.03588	0.0346714	0.139264
FAW_018801	-1.75189	0.0348677	0.13982
FAW_007931	-1.16032	0.0348972	0.139879
FAW_007216	1.20437	0.0350183	0.14019
FAW_020612	1.06425	0.0350602	0.140241
FAW_016197	3.51307	0.0351978	0.140684
FAW_000680	2.68012	0.0352913	0.140903
FAW_005454	1.27502	0.0353876	0.14114
FAW_020117	-1.14779	0.0354108	0.14114
FAW_007904	1.2951	0.0354169	0.14114
FAW_005120	1.34191	0.0354847	0.141351
FAW_012678	1.35743	0.035574	0.141649
FAW_006632	-1.44444	0.0358105	0.142532
FAW_005741	-10.5314	0.0358363	0.142575
FAW_007442	3.46854	0.035912	0.14279
FAW_003909	1.45159	0.0359327	0.14279
FAW_021152	-0.914435	0.0359607	0.14279
FAW_009671	0.986094	0.0359645	0.14279
FAW_004671	-2.44264	0.0359724	1
FAW_016868	2.33549	0.0360047	0.142891
FAW_017370	1.18692	0.036064	0.143051
[truncated: 229 more rows]

## Sheet: Table S3
Table S3 The list of differently expressed proteins in comparison WT vs T1
id	log2(fc)	PValue	FDR	Symbol
FAW_008315	-0.344579	1.07636e-64	6.66695e-61	apolpp
FAW_000767	-0.401055	9.82018e-27	3.04131e-23	Aldh3a2
FAW_017988	-1.1998	2.76651e-26	5.71193e-23	VG
FAW_006742	0.6822	3.83203e-24	5.93389e-21	4CLL5
FAW_000862	-0.360296	1.04311e-23	1.2922e-20	Hsd17b4
FAW_007144	0.298151	1.73824e-22	1.79445e-19	ABCA3
FAW_019619	-0.396009	2.23765e-22	1.98e-19	SMOX
FAW_016655	1.59477	4.49155e-22	3.47759e-19	Alp-m
FAW_011249	0.338341	1.3282e-20	8.22686e-18	Acox3
FAW_008594	-0.375348	1.42338e-19	7.34702e-17	Aldh1b1
FAW_007840	0.627842	1.84663e-19	8.7985e-17	--
FAW_003192	0.318477	2.73793e-19	1.21134e-16	Mdr49
FAW_010807	0.32716	3.14842e-18	1.30009e-15	Gel
FAW_001076	0.416649	1.457e-17	5.30862e-15	--
FAW_017989	-1.31192	1.74975e-16	5.70417e-14	VG
FAW_003565	-0.357012	1.95952e-15	5.27707e-13	Zw
FAW_016801	-0.265456	3.57241e-15	8.85099e-13	Fasn
FAW_020737	0.30119	4.05589e-15	9.48304e-13	Traf2
FAW_011628	0.339512	4.13371e-15	9.48304e-13	l(2)03659
FAW_012966	-0.524142	8.01207e-15	1.77238e-12	CG11899
FAW_001668	0.62417	2.01835e-14	4.16722e-12	--
FAW_003654	-0.304178	2.5964e-14	5.18778e-12	CRAT
FAW_013049	-0.397147	5.05035e-14	9.77558e-12	CG1544
FAW_011275	-0.273601	8.31281e-14	1.5144e-11	ACOX3
FAW_003134	-0.553862	8.98861e-14	1.59073e-11	EN03
FAW_020683	0.294926	4.62728e-13	7.54246e-11	TEX2
FAW_018318	-0.287844	5.76197e-13	8.92241e-11	TAGLN2
FAW_006081	0.332461	8.49267e-13	1.25247e-10	Npc1b
FAW_013240	-0.327944	1.33271e-12	1.87609e-10	CYP9E2
FAW_015522	0.293498	2.33394e-12	3.00163e-10	alpha-Man-IIa
FAW_001602	0.354731	2.37456e-12	3.00163e-10	Pcyt1a
FAW_008789	-0.387767	2.77882e-12	3.31e-10	LCT
FAW_003780	0.675812	4.06593e-12	4.57898e-10	Ddc
FAW_012997	-0.420142	1.15654e-11	1.13445e-09	Aldh1a7
FAW_016061	0.446388	1.17218e-11	1.13445e-09	--
FAW_002961	-0.32269	1.73385e-11	1.62719e-09	Gs2
FAW_018173	0.335048	1.98128e-11	1.83165e-09	CYP6B6
FAW_013057	0.521067	2.97676e-11	2.67218e-09	--
FAW_006722	-0.785125	4.40816e-11	3.79224e-09	GRP
FAW_001486	0.264669	5.42155e-11	4.60015e-09	Exd2
FAW_011131	-0.393033	5.7152e-11	4.78377e-09	SULT1C4
FAW_011646	-0.3769	5.93635e-11	4.82117e-09	tdh
FAW_001837	-0.387421	6.26984e-11	4.91734e-09	Sccpdh
FAW_014940	0.601685	6.27171e-11	4.91734e-09	GA10892
FAW_008461	0.325374	8.08407e-11	6.18182e-09	Tbc1d15
FAW_021360	-0.413886	8.9533e-11	6.63303e-09	UGT2B13
FAW_004378	0.521663	9.26706e-11	6.75296e-09	Sqstm1
FAW_012610	-0.641421	1.07019e-10	7.70785e-09	FAAH2
FAW_019704	0.680124	1.11161e-10	7.91417e-09	Scd1
FAW_011389	-0.305937	2.09022e-10	1.40726e-08	PMP2
FAW_014580	0.30604	2.71846e-10	1.81055e-08	Nsun5
FAW_000062	0.525573	3.88486e-10	2.53293e-08	wol
FAW_000391	-1.52745	5.30007e-10	3.34986e-08	yrbE
FAW_011118	-0.435518	6.47386e-10	3.93128e-08	ALDH7A1
FAW_004374	-0.30149	6.97597e-10	4.19506e-08	AAEL003729
FAW_008407	-0.283702	1.17456e-09	6.61382e-08	--
FAW_013244	-0.320731	1.20131e-09	6.70352e-08	CYP9E2
FAW_020852	-0.312115	1.807e-09	9.40551e-08	MYORG
FAW_018582	-0.433392	1.82326e-09	9.41106e-08	--
FAW_017689	0.303606	2.0152e-09	1.00662e-07	bre-4
FAW_020201	0.506279	3.04302e-09	1.49591e-07	ABCC1
FAW_018911	-0.550031	4.72136e-09	2.24955e-07	Amy35
FAW_012781	-0.372336	6.3242e-09	2.90164e-07	Ance
FAW_011125	-0.696352	9.87333e-09	4.30672e-07	SULT1C4
FAW_012540	0.290782	1.06342e-08	4.60617e-07	Selenoi
FAW_010980	0.273057	1.16237e-08	4.96532e-07	RBM19
FAW_017278	0.366054	1.4055e-08	5.88219e-07	B1
FAW_007841	0.316761	1.51221e-08	6.24442e-07	--
FAW_000023	-0.347006	1.95273e-08	7.80336e-07	SPON1
FAW_011399	-0.264796	1.98416e-08	7.87812e-07	4CLL6
FAW_005366	0.394218	2.06666e-08	8.10183e-07	SVIL
FAW_004661	-0.66968	2.14345e-08	8.29782e-07	CYP4C1
FAW_020515	0.477662	2.70065e-08	1.00167e-06	CYP6B7
FAW_006895	-0.472138	2.84996e-08	1.04453e-06	CYP6B6
FAW_003837	-0.272894	3.34355e-08	1.19711e-06	TGM1
FAW_012958	0.322541	3.96492e-08	1.3797e-06	TRYP4
FAW_022642	0.357852	4.15014e-08	1.43609e-06	PNLIP
FAW_016517	-0.425518	4.72091e-08	1.59861e-06	abhd12
FAW_019297	-0.390005	4.72306e-08	1.59861e-06	Mal-B1
FAW_016584	-0.273268	5.35928e-08	1.77515e-06	SCP2
FAW_016636	-0.708853	5.48831e-08	1.80822e-06	--
FAW_004660	-0.380994	7.28444e-08	2.33782e-06	CYP4C1
FAW_010645	0.377633	7.37958e-08	2.35614e-06	--
FAW_006320	-0.360685	8.94539e-08	2.81257e-06	ALPL
FAW_009646	0.291141	9.17659e-08	2.8707e-06	Gramd1b
FAW_003209	-0.350978	1.00317e-07	3.09652e-06	PGD
FAW_003235	-0.56993	1.16659e-07	3.52482e-06	Phgdh
FAW_012697	0.390745	1.22882e-07	3.65929e-06	bre-4
FAW_005118	0.264509	1.27425e-07	3.77641e-06	Rm62
FAW_007744	-0.343164	1.3144e-07	3.85849e-06	SDR-1
FAW_016527	-0.31679	1.36604e-07	3.99116e-06	fam213b
FAW_003909	0.32868	1.37832e-07	4.00813e-06	NSMAF
FAW_018429	0.275519	1.52405e-07	4.35021e-06	SPTLC1
FAW_000338	-0.279565	1.67105e-07	4.70475e-06	Mlp84B
FAW_000802	0.300159	1.70001e-07	4.76463e-06	Gale
FAW_014382	-0.831258	1.82812e-07	5.05509e-06	yxbG
FAW_017189	0.3951	1.95605e-07	5.3502e-06	Tret1
FAW_001116	-0.921578	2.14599e-07	5.70679e-06	DDO
FAW_012121	-0.279136	2.14673e-07	5.70679e-06	Spn77Ba
FAW_017495	-0.363688	2.68891e-07	6.93962e-06	--
FAW_005055	-0.284062	3.01521e-07	7.62294e-06	RCS1
FAW_011336	-0.541684	3.51391e-07	8.74102e-06	4CLL5
FAW_001925	0.96333	3.59923e-07	8.88193e-06	b4gat1
FAW_017608	0.490098	3.6166e-07	8.88938e-06	Lip1
FAW_004662	-0.301036	4.06088e-07	9.86395e-06	CYP4C1
FAW_006993	-0.303763	4.15619e-07	1.0056e-05	B1
FAW_017603	-0.354072	4.36205e-07	1.0502e-05	GALK1
FAW_000968	0.300645	4.39138e-07	1.0502e-05	EbpIII
FAW_000911	0.837139	4.99978e-07	1.17305e-05	--
FAW_004651	0.272199	5.45377e-07	1.26995e-05	CAP1
FAW_008679	-0.317355	5.73841e-07	1.32626e-05	Acy1
FAW_001778	0.566079	5.94852e-07	1.36971e-05	Mctp
FAW_012031	0.268846	7.00781e-07	1.58353e-05	INSB
FAW_005963	0.302769	7.57706e-07	1.67615e-05	--
FAW_013030	-0.493556	7.7998e-07	1.71929e-05	GstS1
FAW_014782	0.342926	8.33107e-07	1.82342e-05	COTL1
FAW_006717	0.411467	8.95755e-07	1.94677e-05	ATP13A3
FAW_014938	0.410877	1.16824e-06	2.46126e-05	ZDHHC2
FAW_016275	0.450308	1.20128e-06	2.51572e-05	cex-2
FAW_007325	0.35433	1.23286e-06	2.55397e-05	FucTC
FAW_011709	0.263211	1.26987e-06	2.62185e-05	--
FAW_008545	-0.413407	1.28263e-06	2.63941e-05	SLC22A16
FAW_007863	-0.94136	1.36883e-06	2.77984e-05	5NUC
FAW_008434	1.0214	1.37743e-06	2.78817e-05	--
FAW_008292	-0.434396	1.64314e-06	3.25164e-05	CBR1
FAW_013079	-0.36391	1.71019e-06	3.3522e-05	BPHL
FAW_009077	-0.431891	1.99766e-06	3.84271e-05	B1
FAW_003574	0.317789	2.46082e-06	4.66125e-05	--
FAW_018450	-0.309192	2.56012e-06	4.82606e-05	ADH5
FAW_007733	0.338635	2.58119e-06	4.83018e-05	GBA
FAW_010479	0.276715	2.59351e-06	4.83861e-05	PNLIP
FAW_008421	-0.266223	3.47426e-06	6.32928e-05	CDase
FAW_013230	-0.286676	3.83756e-06	6.92998e-05	HPGD
FAW_014613	0.816368	3.93893e-06	7.03104e-05	CYP6B6
FAW_007314	0.543081	3.97775e-06	7.05966e-05	--
FAW_008487	0.422191	4.07067e-06	7.20393e-05	tmem87a
FAW_014885	0.482346	4.37445e-06	7.57188e-05	UGT2B31
FAW_014540	-0.58151	4.57665e-06	7.87439e-05	acbp-1
FAW_003300	-0.280324	4.80985e-06	8.2299e-05	Snmp2
FAW_007632	-0.531196	5.00852e-06	8.51637e-05	fabG
FAW_021545	-0.622411	5.95453e-06	9.78312e-05	Orct
FAW_009323	0.319574	6.68935e-06	0.000108585	Smox
FAW_005973	0.597013	6.69672e-06	0.000108585	CTRL
FAW_000545	-0.429623	7.08863e-06	0.000113749	Pgrmc1
FAW_009839	1.51828	7.39008e-06	0.00011685	CTRL
FAW_020949	0.338006	8.5298e-06	0.000132519	Casp7
FAW_011634	-0.369023	8.83405e-06	0.000136115	Ces2e
FAW_007712	-0.621803	9.83068e-06	0.000148878	F40A3.3
FAW_019426	0.264671	9.93219e-06	0.00014985	--
FAW_010324	0.303303	1.03381e-05	0.000154299	arm
FAW_020431	0.475106	1.06069e-05	0.000157174	--
FAW_013031	-0.703145	1.38804e-05	0.00019629	HPGDS
FAW_009370	-0.310684	1.55993e-05	0.000220096	--
FAW_016029	-0.880396	2.12715e-05	0.000291233	JHEH
FAW_021373	-0.333181	2.39051e-05	0.000317742	NT5E
FAW_001758	-0.480609	2.42898e-05	0.000322166	GDPD6
FAW_004268	-0.518125	2.88141e-05	0.000371822	CG5009
FAW_002195	0.292428	3.21757e-05	0.000409233	--
FAW_010366	-1.08289	3.6036e-05	0.000454131	HPGD
FAW_016621	-0.447958	3.74947e-05	0.000469176	fahd2
FAW_010141	-0.539399	3.84202e-05	0.000476903	--
FAW_013103	0.385933	4.28136e-05	0.000525124	--
FAW_006328	-0.377308	4.46854e-05	0.00054592	SLC25A21
FAW_014577	0.455034	4.77086e-05	0.000578292	ALKBH4
FAW_004349	0.524291	4.82323e-05	0.000582361	--
FAW_022561	0.524291	4.82323e-05	0.000582361	--
FAW_008694	0.316218	5.27137e-05	0.000618387	TBC1D23
FAW_018891	0.678696	5.61879e-05	0.000656656	Inpp5k
FAW_012413	0.833097	5.77789e-05	0.000668939	--
FAW_000509	-0.307948	6.34893e-05	0.000722945	FAP
FAW_020379	0.791922	6.56147e-05	0.0007376	--
FAW_010445	-0.36578	6.84187e-05	0.000760835	PNLIP
FAW_018663	0.313036	6.97307e-05	0.000770848	MGAT1
FAW_012939	0.321357	7.00658e-05	0.000770848	Cyp304a1
FAW_006349	0.289216	7.12349e-05	0.000780936	--
FAW_012343	-0.370395	7.26938e-05	0.00079272	fdl
FAW_001714	0.311092	7.51307e-05	0.000812146	Pak3
FAW_006862	-0.780544	7.69007e-05	0.000828897	--
FAW_020165	-0.282111	7.83209e-05	0.000842222	ACY1
FAW_004267	-0.491263	7.95853e-05	0.000852857	CG5009
FAW_017058	0.295457	8.66601e-05	0.000915994	Fur1
FAW_016659	-0.3843	8.81244e-05	0.000927201	Alp-m
FAW_005054	0.387532	8.90728e-05	0.000934125	PCAS-1
FAW_018535	0.383853	8.97512e-05	0.000937468	PCP36
FAW_004926	-0.311815	9.18017e-05	0.000957272	Bbox1
FAW_020123	0.439208	0.000108604	0.00108914	AGAP009593
FAW_007794	-0.275526	0.000108668	0.00108914	CG32751
FAW_017443	-0.419145	0.000117065	0.00116576	LCT
FAW_005430	0.595203	0.000123596	0.00122098	fabG
FAW_009301	-1.13916	0.00012597	0.001239	--
FAW_008537	-0.518145	0.000130108	0.00126712	Oacyl
FAW_000829	-0.512695	0.000134746	0.00130613	Amy4N
FAW_016028	-0.533159	0.00014537	0.00139	JHEH
FAW_003295	-0.295797	0.000155687	0.0014745	yajO
FAW_012302	0.44036	0.000159082	0.00150207	SGPP1
FAW_018816	0.422305	0.000159583	0.0015045	Upp1
FAW_006827	0.321078	0.000165296	0.00155363	GOPC
FAW_005951	-0.384766	0.000165633	0.00155444	4cl1
FAW_017924	-0.695145	0.000169275	0.00158143	Tret1
FAW_009718	-0.289721	0.000170937	0.00159456	ANPEP
FAW_001554	0.301491	0.000171947	0.00160157	sgsm3
FAW_015051	0.31663	0.00017956	0.00166248	FucTA
FAW_002063	-0.431763	0.000182879	0.00169067	nas-14
FAW_018047	0.269307	0.000193952	0.00177457	Slc41a2
FAW_007710	-0.290925	0.000193959	0.00177457	F40A3.3
FAW_006576	0.323424	0.000194711	0.0017762	Stk11
FAW_004232	-0.940647	0.000203122	0.00183938	--
FAW_009091	0.566254	0.000203811	0.00184176	PBDC1
FAW_000972	1.0605	0.00022325	0.00196143	EbpIII
FAW_003533	0.431317	0.00022874	0.00199271	MKRN2OS
FAW_019298	-0.303302	0.000236928	0.00205537	Mal-B1
FAW_000322	0.276823	0.000240745	0.00207974	BEST2
FAW_008442	0.275211	0.000241335	0.00208169	--
FAW_008482	0.281336	0.00024841	0.00212521	TBCC
FAW_014462	0.272232	0.000275613	0.00231635	SELENOM
FAW_001881	-0.792608	0.000291979	0.00242754	--
FAW_007099	0.734172	0.00030924	0.00253364	--
FAW_023242	-0.379949	0.000318373	0.00259816	TKTL1
FAW_021892	0.492719	0.00033545	0.00271961	--
FAW_017627	0.605143	0.000344679	0.0027835	--
FAW_001813	0.470523	0.000394322	0.00312331	RpL30
FAW_004853	-0.42367	0.000401748	0.00316594	SDR16C5
FAW_009684	0.315619	0.000413632	0.00322761	pol
FAW_017921	0.279931	0.00041448	0.00322761	Tret1-2
FAW_022152	0.279931	0.00041448	0.00322761	Tret1-2
FAW_001723	0.323147	0.00043204	0.00334089	Tango11
FAW_010654	0.395398	0.000432995	0.0033441	daf-36
FAW_011415	-0.6813	0.000436616	0.00336787	Ald
FAW_001926	1.88904	0.00049932	0.00378554	--
FAW_010334	0.29339	0.000505067	0.00382443	Wdr46
FAW_018058	-0.317171	0.000527257	0.00394901	l(2)efl
FAW_016019	-0.308543	0.000551908	0.00407451	Phyh
FAW_016063	0.285887	0.00056688	0.00415533	HERPUD2
FAW_018889	0.483291	0.000590403	0.00427214	--
FAW_003601	0.30863	0.000604183	0.00434647	Tgt
FAW_011635	0.287983	0.000610764	0.00437349	--
FAW_012414	1.11561	0.000615981	0.00440067	--
FAW_016250	-0.300575	0.00062829	0.00446006	Lsd-2
FAW_012390	0.288649	0.00066066	0.00463914	yipf6
FAW_011209	1.30714	0.000661344	0.00463914	TTC27
FAW_020337	-0.283739	0.000685842	0.00477143	fth1-b
FAW_009311	0.285851	0.00074932	0.00515698	Bdh1
FAW_001187	-0.470183	0.000756745	0.00519654	--
FAW_007609	0.282343	0.000766603	0.00523612	Usp32
FAW_014545	0.309929	0.000766736	0.00523612	SODCC
FAW_007626	0.628252	0.000774626	0.005261	fabG
FAW_005085	-0.346056	0.000782916	0.00530111	--
FAW_007869	-0.898694	0.000782972	0.00530111	Gld
FAW_004755	-0.640759	0.000831227	0.00556608	deltaTry
FAW_018223	-0.440806	0.000861295	0.00568749	SDH
FAW_011936	0.364539	0.000871763	0.00574436	--
FAW_011888	-0.337406	0.000907356	0.0059347	SLC31A1
FAW_008708	0.525169	0.000913292	0.00596722	betaTry
FAW_008609	4.61798	0.000959116	0.00618829	Pnliprp2
FAW_009514	0.345943	0.000962884	0.00620614	EAG_12746
FAW_005575	0.447929	0.000966431	0.00622253	HSD17B11
FAW_014779	0.578785	0.000988281	0.00633031	CG5543
FAW_016656	-0.498163	0.00103101	0.00656329	Alp-m
FAW_003594	0.273882	0.00108231	0.00679215	TTPAL
FAW_022651	0.273882	0.00108231	0.00679215	TTPAL
FAW_020788	0.28414	0.00113486	0.00705752	--
FAW_021329	-0.314273	0.00115045	0.00713303	Galphaf
FAW_011554	0.446569	0.00123727	0.00755784	GMFB
FAW_018320	-0.359241	0.00130113	0.00787804	mogat1
FAW_008671	0.273049	0.00132596	0.00798308	Tango1
FAW_007592	-0.330099	0.00132622	0.00798308	Cpa2
FAW_005888	-0.315082	0.00132937	0.00799194	HEXB
FAW_017500	-0.399487	0.00136133	0.00811559	SERP1785
FAW_007064	-0.3211	0.00146637	0.00862555	Slc17a5
FAW_005492	-0.374499	0.00147847	0.008672	C38C10.2
FAW_004448	-0.318115	0.00148806	0.00871999	SLC16A13
FAW_004902	-0.345919	0.00151457	0.00882526	l(2)efl
FAW_020168	-0.338292	0.0015237	0.00885867	Scpep1
FAW_015409	0.280688	0.0015246	0.00885867	Mal-A2
FAW_009783	-0.40459	0.00155063	0.00900152	Tret1
FAW_007442	-0.710543	0.00157592	0.00912269	--
FAW_004269	-0.294484	0.00172335	0.00981376	CG5009
FAW_012412	0.509539	0.00172366	0.00981376	--
FAW_009072	-1.03047	0.00176756	0.0100076	B1
FAW_008507	0.36147	0.00177891	0.0100559	nrf-6
FAW_008130	0.338042	0.00185118	0.0104333	Yipf1
FAW_001776	0.315723	0.00185879	0.0104572	AAEL003512
FAW_015872	0.318815	0.00192787	0.0107389	IWS1
FAW_004404	0.365796	0.00193218	0.0107432	AAEL010968
FAW_000197	0.39537	0.00196136	0.0108805	--
FAW_019968	0.282709	0.00199236	0.0109707	Txn2
FAW_003527	0.362244	0.00201026	0.0110456	Hydr2
FAW_019630	-0.40045	0.00206697	0.0113099	Orct
FAW_017186	-0.367485	0.00212299	0.0115248	SUGTL4
FAW_017753	0.348983	0.00213798	0.0115668	gpatch4
FAW_020307	0.429024	0.00213849	0.0115668	--
FAW_022010	0.323345	0.0021661	0.0116668	TOLLIP
FAW_011030	-0.35007	0.00224863	0.0120485	PDXK
FAW_014905	0.290834	0.00227733	0.0121393	--
FAW_010991	-0.276098	0.00252403	0.0131709	--
FAW_008037	-0.798688	0.00257324	0.0133938	--
FAW_018195	0.407972	0.00260857	0.0135096	Chsy1
FAW_007070	-0.337927	0.00270146	0.0138977	SLC17A5
FAW_015940	-0.35672	0.00291517	0.0147364	--
FAW_009801	-0.646829	0.0030292	0.0151926	LCT
FAW_012469	0.283766	0.00304478	0.0152338	Gclm
FAW_014884	0.292243	0.0030631	0.015313	Ugt2b1
FAW_001502	0.271004	0.00318426	0.0158039	TMBIM4
FAW_006662	0.653075	0.00331507	0.0162964	LCP16/17
FAW_015235	0.295506	0.00334647	0.0164374	TRYP2
FAW_010916	-0.269481	0.00343618	0.016772	PSPH
FAW_020595	-1.33928	0.00346625	0.0168789	MINPP1
FAW_008620	0.403319	0.00347132	0.0168903	ABCG4
FAW_018696	-0.713803	0.00351402	0.0170713	--
FAW_007093	0.292718	0.00353167	0.0171034	INPP5E
FAW_009881	-0.690446	0.00366382	0.0175957	--
FAW_005486	-0.436376	0.00366459	0.0175957	Swip-1
FAW_005658	-0.391	0.00377871	0.0180597	--
FAW_006633	0.680962	0.00393245	0.0187078	--
FAW_020948	0.290855	0.00399105	0.018943	Selenoi
FAW_022376	0.27229	0.00419643	0.0196549	HSD17B12
FAW_022454	0.27229	0.00419643	0.0196549	HSD17B12
FAW_001663	-0.505842	0.00432553	0.0201597	pnbA
FAW_021547	-0.468195	0.00457816	0.021162	Orct
FAW_005491	0.304472	0.00461862	0.0212855	Ate1
FAW_011520	0.334265	0.0046761	0.0214705	Slc26a5
FAW_006471	0.406437	0.00475382	0.0217951	--
FAW_016040	0.29691	0.00496576	0.0226151	--
FAW_004903	-0.527986	0.00505038	0.0229255	--
FAW_012229	0.466347	0.00505591	0.0229256	irk-1
FAW_007284	0.296896	0.005262	0.0236694	MFSD10
FAW_003699	0.346008	0.00541543	0.0242189	--
FAW_008443	0.438989	0.00553772	0.0246236	--
FAW_011128	-0.414703	0.00558012	0.0247588	SULT1C4
FAW_017378	0.459504	0.00574735	0.0253917	--
FAW_020169	-0.363289	0.00583433	0.0256297	Scpep1
FAW_006045	-0.427717	0.00600754	0.0262602	MET13
FAW_001152	-0.340278	0.00607662	0.0264874	--
FAW_020243	-0.310367	0.00614414	0.0267253	--
FAW_021886	0.617799	0.00615819	0.0267488	--
FAW_016161	-0.336323	0.00618486	0.0268271	Sv2c
FAW_004385	1.11372	0.00621456	0.026937	PNLIPRP2
FAW_006683	0.352359	0.00622681	0.0269712	LCP17
FAW_020829	-0.359542	0.00632208	0.0272885	CYP4C1
FAW_018476	-0.419416	0.00639095	0.0274344	GPT
FAW_001063	-0.421036	0.00640639	0.0274389	PEX11A
FAW_013012	-0.54143	0.00646098	0.0275805	--
FAW_010069	0.356282	0.00668692	0.0282402	--
FAW_016224	-0.758309	0.00698299	0.0292643	--
FAW_001576	0.427276	0.00704915	0.0294589	CG6353
FAW_011005	-1.04854	0.00708598	0.0295361	Xpo6
FAW_011484	0.424323	0.0071542	0.0298004	RHBDL2
FAW_021888	0.814884	0.00727948	0.0302409	--
FAW_017376	0.335612	0.00745166	0.0308733	--
FAW_014276	0.350933	0.00782304	0.0319419	msrA
FAW_001734	0.268249	0.00802444	0.032571	RhoL
FAW_020679	0.367298	0.00819989	0.0331312	CG7506
FAW_014386	-0.799782	0.00824663	0.0332655	TM_0325
FAW_020733	0.278217	0.00827073	0.0332655	AAEL006251
FAW_019948	1.92155	0.00831021	0.0333635	CHYM2
FAW_002030	-0.275019	0.00831663	0.0333635	--
FAW_003609	-0.449679	0.00847443	0.0337995	--
FAW_019772	-0.37102	0.00854426	0.0340561	--
FAW_005464	-1.24499	0.008753	0.0347316	SP2
FAW_006506	-0.89183	0.0087908	0.0347481	Edg84A
FAW_020273	0.511528	0.00888636	0.0349798	Sos
FAW_012049	-0.300284	0.00892214	0.0350658	npl-b
FAW_003521	-0.417739	0.00904181	0.0354739	Uro
FAW_002948	0.511203	0.00913361	0.0357608	Bag6-a
FAW_000898	0.32868	0.009671	0.0373688	CHST11
FAW_008812	0.417302	0.00977929	0.0376536	CYP4C1
FAW_014402	0.488208	0.010073	0.0385375	LCP17
FAW_022746	0.450156	0.0102708	0.0391733	Tmprss15
FAW_013009	-0.694075	0.0103291	0.0392706	CBX3
FAW_001375	-0.293124	0.0104812	0.039634	--
FAW_008683	0.399721	0.0114023	0.0425458	--
FAW_011476	0.449023	0.0115519	0.0428972	CERS5
FAW_018101	-0.592315	0.0117906	0.0434967	CYP9E2
FAW_004339	0.624255	0.0119655	0.0440069	--
FAW_017788	-0.469085	0.0123321	0.0451982	--
FAW_015147	0.270654	0.0123979	0.0453855	TTLL4
FAW_021504	-0.301981	0.0124519	0.0455564	PCMT1
FAW_006694	0.633713	0.0126097	0.045998	CP12
FAW_012123	0.47459	0.0126901	0.0462634	SERPINB9
FAW_019477	-0.329175	0.0126974	0.0462634	snk
FAW_011475	0.281476	0.0127153	0.0462965	Cers6
FAW_017951	-0.769304	0.0127289	0.0462965	Hsp70Ba
FAW_017953	-0.769304	0.0127289	0.0462965	Hsp70Ba
FAW_000538	-0.426686	0.0127692	0.0464159	--
FAW_022405	-0.594824	0.0129715	0.0470608	DARS
FAW_004057	-0.401447	0.0133767	0.0482277	PLA2G15
FAW_020536	0.305772	0.0135291	0.0485991	P25
FAW_009456	0.305328	0.013755	0.0492475	Cdk8
FAW_014941	0.302512	0.0140457	0.0500704	Scsalpha
FAW_005071	0.28257	0.014064	0.0500704	--
FAW_020694	0.846384	0.0141391	0.0502743	--
FAW_014880	-0.318142	0.0142206	0.0504771	UGT2B10
FAW_019110	0.987341	0.0143918	0.0509387	--
FAW_018143	0.372322	0.0145494	0.0513206	KPNA5
FAW_011532	1.58401	0.014593	0.051445	bab2
FAW_001630	0.536292	0.014991	0.0522702	--
FAW_002250	0.315718	0.0149991	0.0522702	frc
FAW_022750	1.46956	0.015287	0.0529869	--
FAW_020728	0.460693	0.0155623	0.0538366	rnf121
FAW_017633	0.405142	0.0156982	0.0541999	zip
FAW_015705	0.900264	0.0158321	0.0544448	traf3ip1
FAW_008591	0.3591	0.0161096	0.0551592	SLC9B2
FAW_005974	-0.290194	0.0165306	0.0563205	Jon99Cii
FAW_010165	0.312146	0.0168985	0.0572325	--
FAW_012580	0.275596	0.0173039	0.0582818	ADK
FAW_005748	-0.405733	0.0174126	0.0584853	--
FAW_009246	-0.349232	0.0179515	0.0600062	ACAT1
FAW_016985	1.6547	0.0180434	0.0601576	AGAP005037
FAW_006476	0.429323	0.0182219	0.0606156	grn
FAW_000311	-0.333109	0.018233	0.0606201	Ten-a
FAW_016866	0.36778	0.018877	0.0622599	Ccdc56
FAW_006698	0.838488	0.020148	0.0653628	PCP36
FAW_009082	0.265553	0.0201651	0.0653628	FRG1
FAW_009814	0.50181	0.0202432	0.0655101	Atrnl1
FAW_012295	0.307264	0.0205396	0.0662272	MRPS21
FAW_016015	0.344823	0.0205776	0.0662461	--
FAW_018563	0.351237	0.0209894	0.0673212	GNBP3
FAW_014975	0.289793	0.0210751	0.0674971	ix
FAW_002069	-0.449623	0.0212215	0.0678957	--
FAW_000534	-0.611697	0.0212814	0.0680522	Cenpe
FAW_015468	0.400722	0.0215262	0.0684462	--
FAW_015656	0.308068	0.0216904	0.0688622	Max
FAW_003694	-0.69226	0.0219098	0.0692396	HMT-1
FAW_001008	0.337486	0.0220396	0.0695433	--
FAW_004776	0.414493	0.0224388	0.0704836	SLC16A3
FAW_002027	-0.586116	0.0226428	0.0709407	--
FAW_012778	0.284176	0.0226966	0.0710149	--
FAW_004663	0.422306	0.0227124	0.0710149	Gls
FAW_016964	0.436142	0.0227969	0.0711715	Cspg4
FAW_004390	-0.983181	0.023081	0.0718772	--
FAW_003534	0.335012	0.023181	0.0720778	--
FAW_015616	1.37124	0.0233634	0.0724651	Hsp60A
FAW_008603	0.367109	0.0236127	0.0730291	Lipg
FAW_015688	0.427103	0.0240116	0.0739921	--
FAW_022101	-0.547599	0.0240199	0.0739921	--
FAW_004492	0.294578	0.0247015	0.0757644	GILT1
FAW_017347	-0.414247	0.0248214	0.075998	--
FAW_003698	0.273151	0.0256441	0.0778626	--
FAW_018309	-0.263436	0.0258763	0.078452	--
FAW_000536	-0.743469	0.0266225	0.0800374	--
FAW_000268	-0.582178	0.0267497	0.080353	--
FAW_006690	0.286369	0.0271018	0.0809973	CP12
FAW_018541	0.605324	0.0272627	0.0813416	PCP36a
FAW_018261	-2.12893	0.0279626	0.0830298	--
FAW_004764	0.499042	0.0281437	0.0834078	betaTry
FAW_012016	-0.344597	0.0288144	0.0848571	AGAP009593
FAW_017196	-0.473204	0.0299297	0.0871988	SLC2A6
FAW_012284	0.321282	0.0304402	0.0881059	SIDT2
FAW_009922	-0.337111	0.0304671	0.0881425	SLC10A2
FAW_022691	1.02472	0.0307143	0.0886505	--
FAW_009619	0.319493	0.0309737	0.0890674	--
FAW_007283	0.483655	0.0315112	0.0900882	TOP3A
FAW_020220	0.291367	0.0316401	0.0903544	Far1
FAW_016807	-0.278656	0.0318213	0.0907045	--
FAW_005759	-0.481525	0.0319463	0.0908213	--
FAW_013229	-0.612416	0.0321846	0.0913199	--
FAW_000283	0.283977	0.0323046	0.0915615	--
FAW_019270	0.765003	0.0323141	0.0915615	CBR1
FAW_000555	-1.16728	0.0323614	0.0915699	--
FAW_009432	-0.395474	0.0327413	0.0923574	JHBP
FAW_008224	0.648749	0.0328557	0.0925879	--
FAW_003935	-0.350352	0.0329756	0.0928413	LCT
FAW_009398	0.296431	0.0332014	0.0933923	CCDC88C
FAW_009013	-0.645963	0.0334646	0.0937918	--
FAW_004489	-0.797196	0.0335688	0.0939563	Tmprss9
FAW_016102	-0.791019	0.0341173	0.094806	--
FAW_016216	-0.448462	0.0344163	0.0953907	SLC22A4
FAW_015431	0.28519	0.0344182	0.0953907	POLI
FAW_010194	-0.381548	0.0345601	0.0956501	Cht10
FAW_004178	-0.361449	0.0348353	0.0961971	RnrS
FAW_012415	0.445475	0.0353572	0.0973345	--
FAW_005821	0.425294	0.0356043	0.0978407	rhbg
FAW_003536	0.949949	0.0366598	0.1001	--
FAW_004889	0.264325	0.0366822	0.1001	COX5A
FAW_020257	0.363106	0.0370499	0.100812	--
FAW_001504	-0.373898	0.03705	0.100812	--
FAW_003497	-0.373898	0.03705	0.100812	--
FAW_019237	-0.373898	0.03705	0.100812	PIF1
FAW_021371	-0.373898	0.03705	0.100812	pif1
FAW_016344	-0.304886	0.03706	0.100812	Doa
FAW_014335	-0.660512	0.03744	0.101623	CYP705A22
FAW_003542	0.268269	0.0375071	0.101692	--
FAW_001278	-0.482001	0.037689	0.102031	EGT
FAW_017272	-0.363036	0.0378307	0.102279	B1
FAW_008993	-0.314833	0.0393119	0.104999	--
FAW_001820	-0.295881	0.039396	0.104999	CNDP2
FAW_014619	-1.11878	0.0398111	0.105742	Prps1
FAW_000297	-1.16847	0.0402739	0.106633	urad
FAW_009880	-0.947555	0.0405138	0.107103	--
FAW_015325	-1.46124	0.041009	0.108181	Ppn
FAW_004233	-1.31075	0.0411097	0.108401	--
FAW_012546	0.32374	0.041464	0.108825	Tmprss9
FAW_006569	0.283869	0.0418149	0.109607	AAEL008004
FAW_008624	0.372027	0.0423168	0.110688	amyC
FAW_010061	0.332091	0.0425164	0.11107	PPIH
FAW_006975	-0.308175	0.0432091	0.112262	--
FAW_004617	0.337786	0.0432264	0.112262	metap1d
FAW_015033	0.400618	0.043284	0.112364	Ccp84Ab
FAW_006917	0.278001	0.043746	0.113373	--
FAW_007628	-0.618566	0.044327	0.114579	fabG
FAW_002823	0.35702	0.044579	0.114907	Ubc4
FAW_002796	-0.426868	0.0451632	0.116005	PAN3
FAW_020639	-0.359761	0.0451733	0.116005	Slc17a5
FAW_007227	-0.398511	0.0452188	0.116074	--
FAW_019577	0.320625	0.0453215	0.116289	Taf10
FAW_011123	-0.34299	0.0455443	0.116715	--
FAW_009642	-0.369701	0.0475075	0.120996	--
FAW_006674	2.07648	0.0475479	0.120999	LCP22
FAW_006675	2.07648	0.0475479	0.120999	LCP22
FAW_006680	2.19868	0.0478662	0.121535	--
FAW_001655	-0.439796	0.0478761	0.121535	Ces5a
FAW_005193	-0.4312	0.0479597	0.121652	PNP
FAW_014849	0.27636	0.0486034	0.123028	Lip1
FAW_005528	0.446932	0.0490226	0.123786	clvs2

## Sheet: Table S4
Table S4 The list of differently expressed proteins in comparison WT vs T2
id	log2(fc)	PValue	FDR	Symbol
FAW_016758	-0.398432	1.1402e-56	7.05897e-53	Myo61F
FAW_017166	-0.475597	2.72169e-25	4.21249e-22	APN2
FAW_012036	-0.379792	3.09315e-24	3.82994e-21	APOD
FAW_017169	-0.3841	6.21181e-24	5.49391e-21	APN1
FAW_017988	0.624716	1.76306e-22	1.36438e-19	VG
FAW_019430	-0.971945	2.90287e-22	1.99685e-19	--
FAW_008549	0.373457	2.70426e-20	1.39517e-17	PSAP
FAW_017167	-0.346775	3.20286e-19	1.5253e-16	ANPEP
FAW_005290	-0.630817	3.84627e-18	1.48827e-15	ABCC4
FAW_017989	1.03727	6.35817e-18	2.07176e-15	VG
FAW_004550	-0.416389	1.67469e-16	4.50782e-14	acsbg2
FAW_007144	-0.3246	2.26659e-16	5.84687e-14	ABCA3
FAW_018469	0.456091	4.05812e-16	1.00495e-13	Lrp2
FAW_017168	-0.457609	4.44394e-16	1.05817e-13	ANPEP
FAW_000509	-0.664649	5.21693e-16	1.19622e-13	FAP
FAW_009651	0.798152	8.93686e-16	1.976e-13	--
FAW_000767	-0.28314	1.27496e-15	2.72181e-13	Aldh3a2
FAW_006742	-0.492143	2.73099e-15	5.63585e-13	4CLL5
FAW_020203	0.577225	6.2937e-15	1.14601e-12	--
FAW_001837	0.378592	7.93657e-15	1.40387e-12	Sccpdh
FAW_010080	0.350025	1.47431e-14	2.40195e-12	CG10417
FAW_005086	0.578303	2.35533e-14	3.73894e-12	selenbp1-a
FAW_006826	0.307182	3.65419e-14	5.51782e-12	Sh3beta
FAW_012033	-0.414259	4.53472e-14	6.67624e-12	APOD
FAW_001881	1.66783	5.03645e-14	7.08652e-12	--
FAW_010131	-0.292821	5.79181e-14	7.96825e-12	Cpr
FAW_003837	-0.489242	1.14326e-13	1.44447e-11	TGM1
FAW_013087	-0.295861	1.35354e-13	1.64309e-11	dpyd
FAW_009301	2.09784	3.19088e-13	3.59177e-11	--
FAW_003192	-0.367137	4.76392e-13	5.17429e-11	Mdr49
FAW_002032	0.879187	6.49663e-13	6.81706e-11	--
FAW_015927	0.273969	7.11496e-13	7.26902e-11	rcc1
FAW_003402	0.263758	1.19782e-12	1.1771e-10	--
FAW_000235	-0.318953	1.41857e-12	1.35892e-10	cyb5r2
FAW_017926	0.491093	1.42674e-12	1.35892e-10	slc12a9
FAW_011127	-0.277745	2.5819e-12	2.25135e-10	SULT1E1
FAW_019200	0.263431	3.69122e-12	3.13046e-10	Cul1
FAW_020582	0.265731	3.91788e-12	3.27778e-10	GART
FAW_008263	-0.294784	4.5347e-12	3.74324e-10	--
FAW_018171	0.271593	4.83218e-12	3.93632e-10	CYP6B6
FAW_000901	-0.323338	7.20631e-12	5.64738e-10	nhl-1
FAW_017163	-0.370971	1.39584e-11	1.05386e-09	APN2
FAW_001807	-0.372199	1.42563e-11	1.06338e-09	ABCC4
FAW_009673	0.594706	1.56449e-11	1.15306e-09	Cp1
FAW_012393	-0.496784	1.77193e-11	1.28357e-09	Abcg1
FAW_018582	-0.539956	1.79242e-11	1.28357e-09	--
FAW_004662	-0.490255	1.80375e-11	1.28357e-09	CYP4C1
FAW_000823	0.399245	2.32749e-11	1.61905e-09	VAT1L
FAW_000337	-0.443818	3.66126e-11	2.43729e-09	Mp20
FAW_015859	0.339617	4.88442e-11	3.1831e-09	ATIC
FAW_014656	-0.398287	6.30651e-11	4.06705e-09	CYP6B6
FAW_015244	0.304978	7.71769e-11	4.9258e-09	LMO7
FAW_014901	-0.385708	8.27835e-11	5.22972e-09	--
FAW_006081	-0.420593	9.54954e-11	5.91212e-09	Npc1b
FAW_010141	1.23534	1.11201e-10	6.74949e-09	--
FAW_001808	-0.454542	1.74502e-10	1.03879e-08	ABCC4
FAW_011430	0.394208	1.93447e-10	1.1406e-08	BLMH
FAW_007655	-0.452951	2.06081e-10	1.20363e-08	CYP6B2
FAW_016772	0.5773	2.3283e-10	1.33468e-08	Est-6
FAW_017495	-0.342222	2.44515e-10	1.3888e-08	--
FAW_003570	-0.291401	2.86444e-10	1.61039e-08	SLC27A4
FAW_004129	-0.31816	3.53323e-10	1.93577e-08	--
FAW_020756	0.624134	3.61653e-10	1.96403e-08	Gnpda1
FAW_015625	0.265205	4.12504e-10	2.22071e-08	pug
FAW_005366	0.523658	8.28662e-10	4.23988e-08	SVIL
FAW_009479	-0.466225	8.54975e-10	4.30337e-08	slc16a12
FAW_008421	0.470123	8.73195e-10	4.35964e-08	CDase
FAW_014973	0.285514	9.1916e-10	4.55241e-08	AnxB9
FAW_010645	-0.634301	1.17876e-09	5.57076e-08	--
FAW_010298	0.326601	1.34552e-09	6.3107e-08	FUCA1
FAW_018369	-0.587813	1.39347e-09	6.47674e-08	EGT
FAW_010535	-0.353685	1.46437e-09	6.56952e-08	uap1l1
FAW_012343	0.811406	1.79877e-09	7.89799e-08	fdl
FAW_011969	0.344786	2.07577e-09	8.9868e-08	rbm4.1
FAW_009719	0.441904	2.34645e-09	1.00881e-07	--
FAW_000940	0.302011	2.86945e-09	1.20849e-07	PPIB
FAW_021499	0.605585	3.24633e-09	1.34886e-07	--
FAW_010380	-0.280384	3.37574e-09	1.38405e-07	Ttd14
FAW_007049	0.289771	4.28027e-09	1.73197e-07	--
FAW_014326	0.292875	4.43824e-09	1.78423e-07	Rpn6
FAW_019934	-0.429463	4.75684e-09	1.89998e-07	CHYM1
FAW_002835	0.642229	5.05979e-09	1.99523e-07	PGRP-SA
FAW_014782	0.324284	5.38898e-09	2.0852e-07	COTL1
FAW_016636	-0.679216	5.96685e-09	2.26631e-07	--
FAW_021857	0.94241	6.6742e-09	2.50424e-07	--
FAW_004373	0.389977	6.94936e-09	2.59178e-07	--
FAW_001995	0.299641	7.34437e-09	2.7227e-07	--
FAW_001187	1.22802	7.87297e-09	2.90128e-07	--
FAW_001152	1.12154	8.49487e-09	3.09363e-07	--
FAW_005993	0.51987	1.11776e-08	3.95432e-07	fabG
FAW_013116	0.535491	1.20373e-08	4.21035e-07	MYO15A
FAW_020683	0.266411	1.33283e-08	4.6098e-07	TEX2
FAW_002489	0.408602	1.73329e-08	5.89604e-07	rcc2
FAW_011967	0.296138	1.84154e-08	6.16269e-07	PSMC3
FAW_016250	-0.370655	2.18121e-08	7.14492e-07	Lsd-2
FAW_011829	0.41102	2.29866e-08	7.43273e-07	Far1
FAW_014382	-0.394206	2.59072e-08	8.18324e-07	yxbG
FAW_020853	0.449956	2.66357e-08	8.32836e-07	TBCA
FAW_014910	-0.295735	4.32987e-08	1.30736e-06	--
FAW_015768	0.330336	4.35014e-08	1.30736e-06	CG6693
FAW_007442	1.52701	4.61799e-08	1.37452e-06	--
FAW_011370	0.404697	6.16977e-08	1.77661e-06	RANBP1
FAW_017683	0.415284	6.50104e-08	1.85474e-06	sn
FAW_016638	0.329152	8.80369e-08	2.46623e-06	--
FAW_005045	0.325181	9.02885e-08	2.51791e-06	ADAP1
FAW_009090	0.270597	9.92874e-08	2.70984e-06	--
FAW_004471	0.278329	1.10376e-07	2.99708e-06	pnut
FAW_020337	-0.454836	1.17487e-07	3.16245e-06	fth1-b
FAW_014981	0.268545	1.27424e-07	3.35695e-06	SMARCC2
FAW_003235	0.426633	1.336e-07	3.47527e-06	Phgdh
FAW_015856	0.3647	1.35545e-07	3.48198e-06	Anp32a
FAW_017788	1.34815	1.42716e-07	3.65106e-06	--
FAW_000163	-0.424678	1.65381e-07	4.12519e-06	GBA
FAW_021960	0.336645	1.65914e-07	4.12519e-06	His4
FAW_006636	-0.337804	2.06467e-07	5.0189e-06	stan
FAW_014797	0.321	2.14694e-07	5.13194e-06	betaTub60D
FAW_020169	-0.591199	2.30115e-07	5.46047e-06	Scpep1
FAW_006445	-0.357791	2.30203e-07	5.46047e-06	--
FAW_009582	0.328203	2.42467e-07	5.72945e-06	--
FAW_003609	1.34569	2.4577e-07	5.78541e-06	--
FAW_002024	0.639558	2.57941e-07	5.98094e-06	--
FAW_000370	0.380651	2.68545e-07	6.15763e-06	Rpia
FAW_003646	1.09589	2.74593e-07	6.27309e-06	--
FAW_013242	0.274068	3.04353e-07	6.902e-06	CYP9E2
FAW_009886	0.312912	3.44134e-07	7.63631e-06	LMAN2
FAW_010979	0.7131	3.87122e-07	8.43899e-06	Gusb
FAW_005328	0.571516	4.00839e-07	8.70735e-06	Ppt1
FAW_016416	-0.34596	4.83976e-07	1.03678e-05	Prss16
FAW_005743	0.413246	5.07213e-07	1.07909e-05	acp7
FAW_007158	-0.327573	5.2838e-07	1.12027e-05	NAAT1
FAW_021227	0.274079	5.43907e-07	1.14147e-05	Gst1
FAW_008369	0.281218	5.64724e-07	1.18115e-05	Chaf1b
FAW_000196	0.318856	5.67989e-07	1.18398e-05	Tyms
FAW_001459	0.42725	5.83846e-07	1.21295e-05	CYP9E2
FAW_006939	0.280978	6.05053e-07	1.24448e-05	--
FAW_014881	0.276349	6.13443e-07	1.25756e-05	UGT3A1
FAW_006722	-0.52323	6.62062e-07	1.34388e-05	GRP
FAW_008420	-0.329649	6.8951e-07	1.39502e-05	CDase
FAW_001751	-0.517121	6.93098e-07	1.39771e-05	--
FAW_005748	1.23512	7.54507e-07	1.5117e-05	--
FAW_005365	-0.3524	7.7179e-07	1.54134e-05	--
FAW_006771	-0.286895	8.05147e-07	1.59255e-05	HCCS
FAW_018111	-0.350534	8.11226e-07	1.5992e-05	PRCP
FAW_014486	0.48976	9.00011e-07	1.7467e-05	ADGRG1
FAW_011331	-0.43525	1.04513e-06	1.99089e-05	MFB1
FAW_004369	-0.312913	1.05818e-06	2.00543e-05	wdp
FAW_018723	0.310472	1.21183e-06	2.24624e-05	TCP11L1
FAW_023017	0.310472	1.21183e-06	2.24624e-05	TCP11L1
FAW_008698	-0.328457	1.21897e-06	2.25272e-05	D11DS
FAW_006356	0.272854	1.238e-06	2.28109e-05	SMS
FAW_006638	-0.300739	1.28389e-06	2.34471e-05	--
FAW_009908	0.30848	1.32826e-06	2.4186e-05	PGM3
FAW_011338	-0.324369	1.34797e-06	2.44729e-05	4CLL8
FAW_007064	-0.513071	1.5084e-06	2.71468e-05	Slc17a5
FAW_011860	-0.545953	1.6259e-06	2.91767e-05	Oca2
FAW_004660	-0.312536	1.63322e-06	2.9199e-05	CYP4C1
FAW_004232	0.900562	1.72462e-06	3.05934e-05	--
FAW_021551	-0.614796	1.76048e-06	3.08758e-05	Slc22a1
FAW_021552	-0.614796	1.76048e-06	3.08758e-05	Slc22a1
FAW_021553	-0.614796	1.76048e-06	3.08758e-05	Orct
FAW_003366	0.587204	1.92551e-06	3.35797e-05	Tgfbi
FAW_008912	0.269297	1.9956e-06	3.45105e-05	csnk1a1
FAW_003300	-0.605714	2.04135e-06	3.51055e-05	Snmp2
FAW_017105	-1.02308	2.09182e-06	3.58738e-05	--
FAW_008443	0.484384	2.38197e-06	4.04021e-05	--
FAW_010548	-0.423311	2.50172e-06	4.17496e-05	ApepP
FAW_011570	0.398457	2.50577e-06	4.17496e-05	scaf
FAW_020261	0.294431	2.50861e-06	4.17496e-05	CADM3
FAW_007733	0.449461	2.53263e-06	4.19911e-05	GBA
FAW_009783	-0.567013	2.5367e-06	4.19911e-05	Tret1
FAW_009839	-0.389333	2.56385e-06	4.23275e-05	CTRL
FAW_015065	0.317038	2.67038e-06	4.38523e-05	DUT
FAW_009034	-0.397152	3.12606e-06	5.02722e-05	ABLIM1
FAW_012677	0.318129	3.12628e-06	5.02722e-05	mvd
FAW_019297	-0.320373	3.40017e-06	5.42538e-05	Mal-B1
FAW_021525	-0.334836	3.56301e-06	5.65605e-05	--
FAW_016659	-0.46217	3.91234e-06	6.13197e-05	Alp-m
FAW_019650	0.344251	4.00325e-06	6.25861e-05	UPB1
FAW_012012	-0.268902	4.07898e-06	6.34497e-05	AGAP009593
FAW_003951	0.312979	4.53591e-06	6.96819e-05	ck
FAW_016381	0.406671	4.5878e-06	7.03046e-05	MPI
FAW_008545	-0.325708	4.61904e-06	7.06086e-05	SLC22A16
FAW_020817	1.44233	4.68526e-06	7.14445e-05	--
FAW_000307	0.338246	4.85632e-06	7.34774e-05	CG17065
FAW_006128	0.271319	4.86605e-06	7.34774e-05	Cfap61
FAW_015359	0.307134	4.94546e-06	7.44947e-05	prel
FAW_016741	0.903944	5.70624e-06	8.51093e-05	Chia
FAW_004178	0.722336	6.14014e-06	9.04855e-05	RnrS
FAW_011030	-0.330623	6.19052e-06	9.0604e-05	PDXK
FAW_009498	0.268037	6.3714e-06	9.30315e-05	CSA
FAW_016061	0.587049	6.69155e-06	9.72474e-05	--
FAW_009676	0.433719	6.77954e-06	9.78371e-05	AAEL006169
FAW_014940	0.33746	7.08877e-06	0.000101825	GA10892
FAW_012885	0.362082	7.62986e-06	0.000108093	Cont
FAW_018911	-0.343857	7.73635e-06	0.000109102	Amy35
FAW_018858	0.27256	8.04694e-06	0.000112967	chmp2b
FAW_000118	-0.532822	8.48161e-06	0.000118265	Pnpla3
FAW_006795	-0.541924	8.55584e-06	0.000118992	GST1
FAW_008639	0.307603	8.57218e-06	0.000118992	phy-2
FAW_016657	-0.528298	9.21241e-06	0.000126066	Alp-m
FAW_007422	0.30945	9.41261e-06	0.000127793	RNF181
FAW_020851	-0.263528	9.57292e-06	0.000129402	MYORG
FAW_008567	0.407124	9.86331e-06	0.000132459	Mp20
FAW_007869	-0.38316	1.01159e-05	0.000135265	Gld
FAW_010654	0.323088	1.0608e-05	0.000141234	daf-36
FAW_004745	-0.370025	1.10046e-05	0.000145887	dhdh
FAW_018476	-0.685865	1.13445e-05	0.0001488	GPT
FAW_004849	0.348298	1.14539e-05	0.000149917	Adi1
FAW_019952	-0.566317	1.52551e-05	0.000195942	CHYM2
FAW_005500	-0.304887	1.55664e-05	0.000199114	Cyt-c-p
FAW_012724	-0.30346	1.56992e-05	0.0002004	5NUC
FAW_012015	-0.484663	1.60317e-05	0.000204026	CPO
FAW_007159	-0.635156	1.71833e-05	0.000215348	NAAT1
FAW_010445	-0.381772	1.79849e-05	0.000224485	PNLIP
FAW_009880	1.27983	1.81512e-05	0.000226105	--
FAW_016029	-0.3067	1.82921e-05	0.000227402	JHEH
FAW_011404	0.5242	1.87483e-05	0.000232141	akr2e
FAW_021151	0.48492	1.97374e-05	0.000242317	Fen1
FAW_005602	1.84804	2.16589e-05	0.000261924	CPB1
FAW_005996	-1.21441	2.18512e-05	0.000262812	Jon99Cii
FAW_004448	-0.373952	2.30709e-05	0.000274676	SLC16A13
FAW_011341	0.543827	2.65463e-05	0.000311266	ada2a
FAW_014953	0.51209	2.67018e-05	0.000312496	Sema5b
FAW_009052	-0.756276	2.80556e-05	0.00032549	Orct
FAW_007855	0.382556	2.84587e-05	0.000328708	2021-09-01
FAW_009718	0.715475	2.96471e-05	0.000339899	ANPEP
FAW_011336	-0.263522	3.04923e-05	0.000348201	4CLL5
FAW_009163	-0.286022	3.28783e-05	0.000370764	Aldh18a1
FAW_000002	-0.899642	3.30647e-05	0.000371513	SLC31A1
FAW_015235	-0.387643	3.47614e-05	0.000388462	TRYP2
FAW_003573	0.417753	3.80735e-05	0.000420916	SLC27A4
FAW_015409	-0.318436	3.84139e-05	0.000423922	Mal-A2
FAW_007863	-1.27466	3.90782e-05	0.000427444	5NUC
FAW_009321	0.419616	3.93958e-05	0.000429401	Nudt18
FAW_005888	0.451248	3.99383e-05	0.000434548	HEXB
FAW_014778	0.276221	4.02747e-05	0.000437169	cfaD
FAW_011081	0.383707	4.0391e-05	0.000437169	shep
FAW_010570	0.265163	4.22123e-05	0.00045529	MEMO1
FAW_003630	-0.273876	4.31719e-05	0.000462902	SLC9B2
FAW_016656	-0.740651	4.31768e-05	0.000462902	Alp-m
FAW_008645	0.730159	4.42603e-05	0.000472441	PIK3AP1
FAW_016849	-0.447435	4.56065e-05	0.000483475	Tret1
FAW_007588	-0.358777	4.69345e-05	0.00049417	CPA4
FAW_003780	-0.298284	4.82871e-05	0.00050466	Ddc
FAW_015950	0.397044	5.32731e-05	0.000549689	ena
FAW_001006	0.373037	5.44704e-05	0.000558321	Mapre3
FAW_006785	0.313797	5.99099e-05	0.000609035	AAEL001935
FAW_021254	0.459953	6.33306e-05	0.000638566	GILT1
FAW_002027	1.37785	6.47083e-05	0.000649286	--
FAW_005144	0.677151	6.71047e-05	0.000668994	PPAF2
FAW_004904	-0.281281	6.74665e-05	0.000670441	CTH
FAW_011936	-0.385344	7.00499e-05	0.000691673	--
FAW_000413	-0.295738	7.08305e-05	0.000696051	CG42265
FAW_012716	0.311379	7.73872e-05	0.000749772	Caf1
FAW_001606	0.304337	8.07576e-05	0.00077877	RDH13
FAW_016337	0.451713	8.35541e-05	0.000803236	Zfand5
FAW_011475	-0.328121	8.6652e-05	0.000822795	Cers6
FAW_019652	0.270327	8.84319e-05	0.00083361	Prosbeta3
FAW_003234	0.629675	8.86311e-05	0.000833913	--
FAW_008442	0.377897	9.64953e-05	0.000892303	--
FAW_015702	-0.278958	0.000103966	0.000943462	4CLL7
FAW_000874	0.433386	0.000112977	0.00101663	FDPS
FAW_009881	1.03328	0.000118676	0.00106021	--
FAW_019334	0.47383	0.000121003	0.00107633	STMN4
FAW_001821	0.277751	0.000121232	0.00107682	--
FAW_002069	1.69384	0.000122138	0.00108332	--
FAW_004390	2.0048	0.000122623	0.00108606	--
FAW_007632	-0.482848	0.00013403	0.00117533	fabG
FAW_001819	0.87963	0.000135377	0.00118517	Spn88Ea
FAW_016475	0.941212	0.000140987	0.00122419	--
FAW_020579	0.369121	0.000152606	0.00130676	HEXB
FAW_002720	-0.504778	0.000158754	0.00134452	CarT
FAW_011760	0.287909	0.000164322	0.0013841	HMGXB4
FAW_005405	0.295408	0.00016539	0.00139121	CG5235
FAW_006259	0.317364	0.000169432	0.00141751	Gmd
FAW_008990	1.64665	0.000170005	0.00142038	--
FAW_011764	0.287608	0.000181376	0.00150898	--
FAW_021405	-0.423253	0.000185487	0.00153522	Tret1
FAW_023205	-0.423253	0.000185487	0.00153522	Tret1
FAW_009013	1.02328	0.000198062	0.00162626	--
FAW_006370	-0.517509	0.000209619	0.00170533	ELOVL6
FAW_004727	-0.312786	0.000214541	0.00173398	CG9186
FAW_013090	0.479518	0.000214936	0.0017349	Mipp1
FAW_006986	0.358563	0.000218535	0.0017548	rap1gds1-a
FAW_008946	0.453466	0.000222197	0.00178189	--
FAW_020123	-0.287511	0.000225974	0.00180517	AGAP009593
FAW_001845	0.358637	0.000227732	0.00180987	Hcf
FAW_018397	0.30222	0.000235466	0.00185703	GE25944
FAW_010564	0.286042	0.000238239	0.00187557	--
FAW_010479	-0.349378	0.000247915	0.00193675	PNLIP
FAW_008537	-0.528888	0.000248077	0.00193675	Oacyl
FAW_006915	0.456503	0.000255923	0.001983	slc46a1
FAW_014617	0.400235	0.000257258	0.00198936	UBE2Q1
FAW_011283	0.427061	0.000263176	0.00202652	Traf4
FAW_002030	1.04289	0.000264701	0.00203321	--
FAW_017608	-0.606904	0.000266667	0.00204071	Lip1
FAW_011574	0.433255	0.000276972	0.00211174	Sidt1
FAW_016572	0.339572	0.000298728	0.0022497	GST2
FAW_017035	-0.657841	0.000321108	0.00236664	PNLIPRP2
FAW_006761	0.269868	0.000333136	0.002435	--
FAW_021326	0.672482	0.000349526	0.00252204	Hist1h3b
FAW_021804	0.672482	0.000349526	0.00252204	Hist1h3b
FAW_021957	0.672482	0.000349526	0.00252204	Hist1h3b
FAW_021966	0.672482	0.000349526	0.00252204	Hist1h3b
FAW_022737	0.672482	0.000349526	0.00252204	Hist1h3b
FAW_022742	0.672482	0.000349526	0.00252204	Hist1h3b
FAW_022778	0.672482	0.000349526	0.00252204	Hist1h3b
FAW_022846	0.672482	0.000349526	0.00252204	Hist1h3b
FAW_022220	0.487946	0.000353758	0.00254961	GST1
FAW_008621	-0.337246	0.000357173	0.00257123	ABCG4
FAW_013136	0.420348	0.00035844	0.00257736	tty
FAW_016200	-0.614949	0.000358893	0.00257762	SV2B
FAW_020636	-0.29479	0.000369812	0.00264683	nrf-6
FAW_006985	0.312858	0.0003738	0.00267228	nsmce2
FAW_018322	0.336349	0.000383764	0.00273404	ash2
FAW_000168	0.588239	0.000394519	0.00280736	Dsp1
FAW_007250	-0.38167	0.000394962	0.00280736	KCNJ12
FAW_018637	0.456173	0.000403802	0.00285707	DHFR
FAW_018383	-0.666523	0.000409576	0.00289462	slc5a8
FAW_005075	-0.300969	0.000410232	0.00289595	METTL9
FAW_000465	0.278339	0.000421474	0.00295758	Vamp7
FAW_009696	0.711332	0.000446387	0.00310166	--
FAW_020271	0.316024	0.000452424	0.00313657	--
FAW_002988	-0.33147	0.000459799	0.00317348	--
FAW_006073	0.943568	0.00046355	0.00319581	--
FAW_014834	0.487059	0.000473403	0.00325287	Vps28
FAW_011520	-0.485909	0.000484427	0.00332493	Slc26a5
FAW_017348	-0.514047	0.000535237	0.00362544	--
FAW_020338	-0.325852	0.000544187	0.00367802	FERH
FAW_009822	-0.730816	0.000569426	0.00381941	Tret1
FAW_010280	0.323933	0.000572765	0.00383126	Drice
FAW_019704	0.368432	0.000573049	0.00383126	Scd1
FAW_021081	0.282982	0.000582395	0.00387585	Inpp1
FAW_018535	-0.510107	0.000582524	0.00387585	PCP36
FAW_004891	0.279792	0.000582849	0.00387585	Klp10A
FAW_020431	0.325188	0.000588445	0.00390886	--
FAW_006777	-0.418445	0.000598699	0.00394733	NOLC1
FAW_023242	0.387004	0.000602293	0.00396681	TKTL1
FAW_008434	0.355969	0.000621662	0.00407702	--
FAW_008989	2.01955	0.000640292	0.00417708	--
FAW_019298	-0.343466	0.000643458	0.00418763	Mal-B1
FAW_001992	1.19299	0.000643938	0.00418763	Hr4
FAW_020168	-0.647958	0.00065301	0.00423328	Scpep1
FAW_007244	0.484189	0.000665515	0.00430568	--
FAW_016595	-0.420288	0.000672698	0.0043382	--
FAW_017189	-0.730396	0.000683655	0.00439057	Tret1
FAW_012013	-0.415635	0.00068927	0.00441289	AGAP009593
FAW_017603	-0.292709	0.000697041	0.00445344	GALK1
FAW_007164	0.279774	0.000725951	0.00461433	ndel1-b
FAW_000268	-0.352206	0.00072712	0.00461702	--
FAW_001842	0.265284	0.000737606	0.00466081	SERPINI1
FAW_008992	2.66163	0.000737779	0.00466081	--
FAW_010547	0.288909	0.000739339	0.0046659	AAEL004607
FAW_015075	1.27823	0.000762451	0.00479222	Jupiter
FAW_021545	-1.2937	0.000777502	0.00487198	Orct
FAW_016498	0.266402	0.000811163	0.00506241	DCPS
FAW_004776	-0.78511	0.000831563	0.00517928	SLC16A3
FAW_001063	-0.344393	0.000839913	0.00522078	PEX11A
FAW_010194	0.907461	0.000848763	0.00527051	Cht10
FAW_004661	-0.36196	0.000851155	0.00528006	CYP4C1
FAW_001687	0.563951	0.000861729	0.0053403	ttk
FAW_015410	0.37609	0.000867369	0.00536452	ZC2HC1B
FAW_022571	0.37609	0.000867369	0.00536452	ZC2HC1B
FAW_015542	0.795385	0.000876426	0.00541512	AKR1A1
FAW_021107	0.382694	0.000894456	0.00551551	Trex1
FAW_017617	1.03694	0.000900831	0.00554378	Cht10
FAW_021373	-0.343735	0.000909938	0.00559427	NT5E
FAW_006037	0.373938	0.000984081	0.00600241	PSMB2
FAW_006506	1.90462	0.00100222	0.00607711	Edg84A
FAW_000420	0.300696	0.00100651	0.00609718	SKP1
FAW_004349	0.354853	0.00101141	0.00611488	--
FAW_022561	0.354853	0.00101141	0.00611488	--
FAW_018347	-0.306562	0.00102691	0.00618039	CA7
FAW_000061	0.518573	0.00102724	0.00618039	Pdcd6
FAW_010630	0.289152	0.00103245	0.00620571	--
FAW_009207	-0.379539	0.00104363	0.00625473	--
FAW_017141	-0.584541	0.00105224	0.00629556	alas2
FAW_009514	0.483087	0.00105806	0.00631064	EAG_12746
FAW_017954	-0.755645	0.00109825	0.00650028	Tret1
FAW_001521	-0.293506	0.00111796	0.00658542	Glipr2
FAW_021892	0.711928	0.00114413	0.00670626	--
FAW_013031	0.513913	0.00116239	0.00679432	HPGDS
FAW_001811	-0.529964	0.00120372	0.0069843	--
FAW_020739	0.290028	0.00125584	0.00721901	Nub1
FAW_018813	0.329793	0.001263	0.00724002	reep6
FAW_005007	0.336449	0.00128638	0.00734682	Src64B
FAW_017193	0.399649	0.00129053	0.0073502	AGRN
FAW_006975	0.990006	0.00129798	0.00735881	--
FAW_006326	0.496053	0.0013232	0.00749488	ESR16
FAW_010020	0.26843	0.00134283	0.00758546	Glod4
FAW_003432	0.375199	0.0013667	0.00769203	Ppt2
FAW_021910	0.36678	0.00138126	0.00775988	MTMR8
FAW_006414	-0.335411	0.0013894	0.00777872	CG17119
FAW_000043	0.473497	0.00141264	0.00787187	Arl1
FAW_001584	0.288718	0.0014147	0.00787628	pola1
FAW_004381	-0.737064	0.00147266	0.0081404	liph
FAW_003522	0.303944	0.00149479	0.0082333	MPP6
FAW_012779	-0.342102	0.00150275	0.00826248	ACE
FAW_001322	-0.427155	0.0015059	0.00826591	--
FAW_009196	0.310067	0.00154412	0.00841516	ctr9
FAW_010920	0.533095	0.00161058	0.00870081	CG4928
FAW_004267	-0.5435	0.00163975	0.00884295	CG5009
FAW_003026	0.52884	0.00165976	0.00894305	Plod3
FAW_007227	0.786492	0.00170125	0.00909336	--
FAW_014545	-0.306987	0.00187052	0.00988085	SODCC
FAW_011996	0.388204	0.00190555	0.0100231	CEL
FAW_015759	0.666361	0.00195044	0.0101814	CCDC12
FAW_016212	0.27069	0.00197664	0.0102749	--
FAW_000944	0.275807	0.00201235	0.0104255	UBE2R2
FAW_022101	1.17741	0.00203186	0.010509	--
FAW_020750	-0.401941	0.00210344	0.010789	Cyt-b5
FAW_022865	-0.412844	0.00210724	0.0107978	EGT
FAW_014461	0.308881	0.00217667	0.0110729	CASP2
FAW_021453	0.366598	0.00218454	0.0111038	NAGA
FAW_007838	0.310428	0.00221166	0.0112049	CBX3
FAW_015003	1.79307	0.00228099	0.011481	CHIA
FAW_003009	1.25501	0.00229621	0.0115482	Nep2
FAW_008756	0.84214	0.00236973	0.0117745	Men1
FAW_016725	0.385505	0.00251001	0.0122955	AnxB10
FAW_011554	0.310728	0.00251347	0.0123011	GMFB
FAW_016807	-0.334864	0.00252992	0.0123718	--
FAW_000911	0.479707	0.00253558	0.0123892	--
FAW_017627	0.906558	0.00264485	0.0127625	--
FAW_002125	-0.490032	0.00273757	0.0131484	GAPVD1
FAW_004828	-0.414427	0.00274002	0.01315	atl
FAW_019772	-1.02206	0.00280474	0.0133879	--
FAW_015607	-0.571707	0.00281283	0.0134059	slc39a1
FAW_015698	-0.319684	0.00285843	0.0136023	4cl1
FAW_002921	0.297695	0.00287173	0.0136551	Tbc1d13
FAW_021419	0.356294	0.00292021	0.013842	Cals
FAW_005575	-0.543426	0.00293882	0.0138921	HSD17B11
FAW_010463	-0.306213	0.00312904	0.0146092	Rab24
FAW_006577	0.497641	0.00320314	0.0148565	y
FAW_003645	0.465045	0.00328093	0.0151584	--
FAW_019807	0.666657	0.00334954	0.0153835	chiA
FAW_022547	0.666657	0.00334954	0.0153835	chiA
FAW_022904	0.666657	0.00334954	0.0153835	chiA
FAW_002938	-0.666925	0.00338671	0.0155312	SLC24A5
FAW_006273	0.295877	0.00340533	0.0155935	--
FAW_022864	-0.82605	0.00342299	0.0156512	EGT
FAW_015468	3.10267	0.00351438	0.01601	--
FAW_005950	0.299478	0.00360745	0.0163737	PPP4R2r
FAW_010541	1.6214	0.00385763	0.0172189	--
FAW_018697	0.395269	0.00389055	0.0173034	HR3
FAW_014349	0.279806	0.00393764	0.0174627	kraken
FAW_001360	0.285605	0.00403116	0.0177472	--
FAW_010160	-0.344338	0.0040544	0.0178146	ine
FAW_000968	0.468511	0.00428244	0.0186024	EbpIII
FAW_020402	1.39364	0.00428477	0.0186024	Pxd
FAW_003599	0.383293	0.00445223	0.0192339	Pka-C3
FAW_018868	0.372891	0.00445508	0.0192339	DNMT1
FAW_010615	0.318384	0.00448183	0.0193224	--
FAW_011375	0.685589	0.00449786	0.0193377	--
FAW_018410	0.267919	0.00453007	0.0194491	Spag7
FAW_016384	0.954492	0.0046049	0.0197206	Pxt
FAW_022507	0.36526	0.00460604	0.0197206	Macrod2
FAW_022546	0.36526	0.00460604	0.0197206	Macrod2
FAW_006681	0.556128	0.00462392	0.0197835	Edg78E
FAW_016479	-0.319437	0.00467477	0.0199597	Pu
FAW_009721	0.503062	0.00469575	0.0200317	abcG20
FAW_014554	-0.589427	0.00480923	0.0204211	SLC26A11
FAW_009849	0.280932	0.00484247	0.02052	SmD2
FAW_012780	-0.306516	0.00490103	0.0206973	--
FAW_019146	-0.272782	0.00495265	0.0208868	fus
FAW_012879	0.282921	0.00507113	0.0212706	CG4456
FAW_005982	-0.489028	0.00509432	0.0213389	Cela1
FAW_004804	1.19256	0.00513002	0.0214739	--
FAW_010821	0.276087	0.00516705	0.0215997	RANGAP1
FAW_001672	0.272904	0.00523226	0.0218576	Plekhm1
FAW_004144	0.276976	0.00531907	0.0221903	PRCP
FAW_015258	0.296625	0.00551054	0.0227742	--
FAW_018674	0.265422	0.00555284	0.0229337	Carnmt1
FAW_017377	-0.692641	0.005572	0.0229669	--
FAW_020429	-0.275978	0.00561393	0.0230803	CEL
FAW_010593	0.278426	0.00566408	0.0232535	orb2
FAW_012763	0.309011	0.0057344	0.0234489	PPOX
FAW_010916	-0.314574	0.00581165	0.0237491	PSPH
FAW_007592	-0.565734	0.00582309	0.0237802	Cpa2
FAW_009791	0.526972	0.00584775	0.0238337	Rdh14
FAW_003553	-0.39895	0.00590586	0.0240073	DPP4
FAW_018100	-0.390061	0.00592268	0.0240487	AAEL003512
FAW_010169	-0.518133	0.00593935	0.024096	FAM126A
FAW_018937	0.329611	0.00600248	0.0242885	ARID5B
FAW_005486	0.264413	0.00602537	0.0243493	Swip-1
FAW_005136	0.30601	0.00603721	0.0243653	Enox1
FAW_008987	2.59059	0.0063619	0.0254764	--
FAW_012287	-0.328447	0.00637033	0.0254772	slc52a3b
FAW_000687	-0.820106	0.00641635	0.025629	Tret1
FAW_000279	-0.34136	0.00641656	0.025629	egh
FAW_018608	0.267879	0.00643946	0.0257039	--
FAW_014613	-0.52859	0.00648495	0.0258521	CYP6B6
FAW_015544	0.285663	0.00652812	0.0259573	Smug1
FAW_008605	-0.774605	0.00655074	0.0259972	Lipg
FAW_000322	-0.427174	0.00667849	0.0263186	BEST2
FAW_000972	-0.4748	0.00673845	0.0264874	EbpIII
FAW_018318	-0.265832	0.00692024	0.0270988	TAGLN2
FAW_016569	-0.727744	0.00695666	0.027207	Slc22a13
FAW_004254	0.792394	0.00704944	0.0274658	Slco3a1
FAW_012251	2.93354	0.0070642	0.027506	--
FAW_015533	0.930177	0.00708383	0.0275651	CG5521
FAW_014592	0.26336	0.00709435	0.0275886	FBP1
FAW_004688	0.353142	0.0073595	0.0284056	InR
FAW_020007	0.300372	0.00742099	0.028554	EPC1
FAW_021805	0.283424	0.00754326	0.0288809	His4
FAW_021958	0.283424	0.00754326	0.0288809	His4
FAW_022736	0.283424	0.00754326	0.0288809	His4
FAW_022773	0.283424	0.00754326	0.0288809	His4
FAW_022842	0.283424	0.00754326	0.0288809	His4
FAW_012778	0.7269	0.00775078	0.0296021	--
FAW_015609	-0.939519	0.00777658	0.0296824	--
FAW_019019	-0.322193	0.00785988	0.0299449	--
FAW_012774	-0.553484	0.0079825	0.0303188	Ace3
FAW_008993	0.650629	0.00807403	0.0305727	--
FAW_010998	1.40742	0.00825189	0.0311252	CPM
FAW_018059	0.39636	0.00842357	0.0316254	l(2)efl
FAW_018055	0.280851	0.00852729	0.0319181	--
FAW_001220	0.475515	0.00860688	0.0320609	--
FAW_021690	0.316223	0.00868955	0.0323105	OTUD7B
FAW_013251	-0.362699	0.00873785	0.0324511	SLC26A11
FAW_006358	0.404754	0.00879016	0.0326063	eIF4E1
FAW_020545	0.315096	0.0091534	0.0335715	FBXL2
FAW_000965	0.63278	0.0092123	0.0337475	EbpIII
FAW_002368	0.710553	0.00940266	0.0343433	Svep1
FAW_016436	0.383352	0.00942885	0.0344186	--
FAW_000826	-0.279118	0.00973781	0.0353796	Hnf4
FAW_008854	1.40398	0.0100118	0.0361929	Slc5a8
FAW_001157	-0.745812	0.0101788	0.0366803	PLPP1
FAW_011517	-0.468517	0.0101987	0.0366882	ST14
FAW_010255	-0.318612	0.0102601	0.0368449	phm
FAW_003637	0.276488	0.0103026	0.036933	cwc15
FAW_007067	-0.308942	0.0105577	0.037699	SLC17A5
FAW_015606	0.783414	0.0106314	0.0379185	C14orf119
FAW_006250	0.280676	0.0106326	0.0379185	DAAM2
FAW_017561	0.376261	0.0108115	0.0384236	Rpn10
FAW_003510	0.372495	0.0110019	0.0388926	DNApol-alpha60
FAW_020868	-0.632411	0.0110125	0.0388926	Cyp6g2
FAW_022954	-0.632411	0.0110125	0.0388926	Cyp3a9
FAW_004892	-0.468117	0.0110331	0.0389231	AAEL005383
FAW_009469	0.427772	0.0111434	0.039198	reep2
FAW_017320	0.759754	0.0112968	0.0396028	--
FAW_022028	-0.414406	0.0113125	0.0396355	--
FAW_017335	0.414927	0.0113404	0.0397108	Mllt3
FAW_020121	-0.560049	0.011751	0.0408939	Cpa2
FAW_017188	-0.57238	0.0118104	0.0410315	SLC2A8
FAW_021155	-0.545192	0.0118747	0.0411856	GMPR
FAW_007226	1.19137	0.0121622	0.0420181	--
FAW_014789	0.45623	0.0123755	0.0426361	LCP2
FAW_000953	-0.280105	0.0124903	0.042936	--
FAW_019114	0.274294	0.0125557	0.0430865	--
FAW_014358	0.854358	0.0130654	0.0445664	--
FAW_001776	-0.414174	0.0131663	0.0448609	AAEL003512
FAW_001351	1.43073	0.0132501	0.0450684	--
FAW_000538	0.424418	0.013446	0.0456133	--
FAW_008657	1.19954	0.0134882	0.0457313	--
FAW_005429	0.374228	0.0139229	0.0468556	--
FAW_006917	-0.473094	0.0140681	0.0471551	--
FAW_002778	0.693633	0.0144424	0.048175	Dnajc22
FAW_009698	0.533641	0.0146082	0.0486235	Skeletor
FAW_014386	-0.3097	0.0148525	0.0493303	TM_0325
FAW_001758	-0.622052	0.0148761	0.0493719	GDPD6
FAW_018816	-0.60061	0.01502	0.04978	Upp1
FAW_001279	-0.837926	0.0150447	0.0498085	EGT
FAW_021889	-0.491469	0.0151927	0.0501909	--
FAW_015510	0.286688	0.0153142	0.0505385	Pli
FAW_019169	-0.58188	0.0154519	0.0508846	Odc1
FAW_015911	1.06266	0.0157305	0.0515587	Gld
FAW_005430	0.772161	0.0159555	0.0521819	fabG
FAW_002349	1.07914	0.0162752	0.05292	--
FAW_012488	-0.341147	0.0163176	0.0530301	Ndufb9
FAW_012777	0.559823	0.0163285	0.0530375	--
FAW_015928	0.268659	0.0163743	0.0531308	--
FAW_005037	-0.361701	0.0167585	0.0541219	Mctp
FAW_008553	0.357341	0.0168139	0.0542689	eff
FAW_017022	1.3283	0.0168732	0.0543284	--
FAW_022870	1.3283	0.0168732	0.0543284	--
FAW_003865	0.388517	0.0168751	0.0543284	KDELC1
FAW_013062	-0.281699	0.0169627	0.0545537	Glut1
FAW_000469	0.274803	0.0170327	0.0546937	CG42265
FAW_006375	0.2893	0.0171889	0.0551665	PDSS2
FAW_010451	-0.302247	0.0173219	0.0555359	PNLIP
FAW_017635	-0.288823	0.0178132	0.0567877	brn
FAW_017636	-0.288823	0.0178132	0.0567877	brn
FAW_017637	-0.288823	0.0178132	0.0567877	brn
FAW_019694	0.504492	0.0180069	0.0572576	Trim9
FAW_011345	-0.445497	0.0181073	0.0575473	ada2
FAW_017186	-0.342888	0.0185025	0.0585669	SUGTL4
FAW_022380	0.370356	0.0185398	0.0586209	ced-6
FAW_000774	0.743924	0.0187345	0.0590904	--
FAW_017921	-0.691413	0.0187646	0.0590904	Tret1-2
FAW_022152	-0.691413	0.0187646	0.0590904	Tret1-2
FAW_015287	0.89144	0.0188495	0.0592373	--
FAW_019709	0.569517	0.019209	0.0600973	--
FAW_017343	-0.641992	0.0194489	0.0606896	cbd-1
FAW_001008	0.518037	0.0200008	0.0621299	--
FAW_021231	0.335638	0.0201046	0.0623585	--
FAW_005249	-0.341324	0.0211188	0.0648223	Slc25a17
FAW_006621	0.409188	0.0212978	0.0653068	CG4666
FAW_013012	0.796675	0.0213144	0.0653253	--
FAW_012708	0.325969	0.0214808	0.0657054	Nadk
FAW_008751	0.56899	0.0216222	0.0660272	--
FAW_021547	-0.26502	0.0217141	0.06619	Orct
FAW_012282	0.333018	0.0219646	0.0667893	CHIT1
FAW_020249	0.281453	0.0221139	0.0671791	SCARB1
FAW_008204	1.67981	0.0221987	0.0673426	--
FAW_022746	-0.394552	0.0222544	0.0674116	Tmprss15
FAW_007628	-0.551145	0.0226719	0.0685026	fabG
FAW_017445	-0.457843	0.022878	0.0689906	RpL29
FAW_011136	0.401432	0.0229867	0.0692846	--
FAW_006983	0.403284	0.0231132	0.0695306	--
FAW_020117	-0.266189	0.0231252	0.0695328	Cpa5
FAW_007525	-0.346536	0.0234659	0.0704145	--
FAW_006120	0.889626	0.0238214	0.0711424	--
FAW_018143	0.673679	0.0241682	0.0719352	KPNA5
FAW_012334	0.268902	0.0243448	0.0723326	Ammecr1l
FAW_005570	0.512225	0.0243803	0.0723925	Sdr16c6
FAW_015240	-0.309259	0.024579	0.0728777	pyx
FAW_010488	0.666587	0.0246075	0.0729271	--
FAW_000363	0.3523	0.0248404	0.0734767	ANAPC4
FAW_007591	-0.62862	0.0251428	0.0742294	Cpa2
FAW_008122	0.286099	0.0255924	0.075413	lamtor1
FAW_005198	-0.293515	0.0257963	0.0758333	Lip1
FAW_005199	-0.293515	0.0257963	0.0758333	Lip1
FAW_000754	0.46691	0.0259286	0.0761139	Usp14
FAW_021140	0.506974	0.0260656	0.076299	Atg6
FAW_016216	-0.308513	0.0263225	0.0768387	SLC22A4
FAW_011075	0.292093	0.0265467	0.0773779	Chchd2
FAW_020635	-0.700519	0.0268163	0.0779652	SLC17A5
FAW_004385	0.541581	0.0273537	0.0792173	PNLIPRP2
FAW_010908	-0.381367	0.0279039	0.0804625	Rnf25
FAW_004572	0.370329	0.0291389	0.0833963	CG18661
FAW_016205	0.472589	0.0302858	0.0860795	Apc
FAW_021787	-0.265836	0.0303178	0.0860795	ATP6AP1
FAW_002931	-0.371561	0.0307938	0.0871255	slc46a1
FAW_011914	0.273116	0.0310277	0.0875935	Ap2s1
FAW_015325	0.884953	0.031071	0.0876359	Ppn
FAW_020370	0.331307	0.0310868	0.0876404	Dcp2
FAW_005708	0.263216	0.0311903	0.0877724	Syf2
FAW_017272	-0.301437	0.0313218	0.0880623	B1
FAW_020304	-0.323315	0.0321105	0.0897882	--
FAW_003358	-0.418856	0.0321336	0.0897882	Hn
FAW_011703	0.769102	0.0322373	0.0898608	ANKRD50
FAW_022296	0.769102	0.0322373	0.0898608	ANKRD50
FAW_001804	0.369811	0.0326048	0.0906637	wos2
FAW_010779	-0.425998	0.0334437	0.092063	SLC25A44
FAW_004763	-0.311954	0.0337772	0.0928985	betaTry
FAW_014692	0.273318	0.0338626	0.0930921	IntS3
FAW_001510	-0.464119	0.0343288	0.0941916	--
FAW_012489	0.323267	0.0350977	0.0953863	RLBP1
FAW_019344	0.343662	0.0352664	0.0957188	--
FAW_002948	-0.433012	0.0353357	0.0958207	Bag6-a
FAW_001533	0.32387	0.0353659	0.0958207	URH2
FAW_016575	-0.284739	0.035412	0.0959037	Slc25a11
FAW_006631	-0.343534	0.0355267	0.0960881	SRRM1
FAW_017585	0.385048	0.0357857	0.0966621	H3f3a
FAW_010390	0.342845	0.0359407	0.0969959	--
FAW_010356	0.422164	0.0365269	0.0981076	CTSH
FAW_019515	-0.297954	0.0372463	0.0993116	--
FAW_012275	0.263702	0.0372555	0.0993116	--
FAW_009920	-0.546238	0.0378856	0.100321	--
FAW_007407	0.268799	0.0382443	0.100893	RNF17
FAW_008384	0.530869	0.03866	0.101805	--
FAW_021511	0.272487	0.0391938	0.10276	COX7A
FAW_000355	-0.301989	0.0394441	0.103212	--
FAW_005367	0.315667	0.0394797	0.103249	--
FAW_007614	0.359468	0.0396311	0.103526	gpn3
FAW_011190	0.350117	0.0403958	0.104996	cta
FAW_008894	0.272156	0.0404745	0.105152	EMC6
FAW_019349	0.529977	0.0405437	0.105199	--
FAW_004806	0.269455	0.0406033	0.10531	--
FAW_017448	0.281417	0.0410461	0.106147	--
FAW_018261	-1.44539	0.0414562	0.107074	--
FAW_008162	0.26577	0.0415671	0.107315	Dyrk2
FAW_017399	0.510574	0.0419248	0.108097	--
FAW_020226	0.30514	0.0426472	0.109465	borcs5
FAW_020810	-0.341966	0.0442452	0.11254	cbd-1
FAW_011903	0.283812	0.0443382	0.112637	tmem179
FAW_002058	-0.950728	0.0456169	0.115034	hceb
FAW_019410	-0.298886	0.0458016	0.115314	Alkbh7
FAW_003686	0.272143	0.0461161	0.115823	CG6153
FAW_017521	0.32539	0.0466871	0.116973	--
FAW_003632	-0.565778	0.0475964	0.118758	mth2
FAW_006079	0.306192	0.047617	0.118758	--
FAW_015969	0.471119	0.04763	0.118758	PAPOLA
FAW_004233	1.26991	0.0477532	0.118969	--
FAW_014540	-0.417099	0.0477972	0.118984	acbp-1
FAW_008334	1.77851	0.0481203	0.11963	nub
FAW_017523	-0.294278	0.0483791	0.119998	Act5C
FAW_017525	-0.294278	0.0483791	0.119998	actA3a
FAW_007206	0.705829	0.0486963	0.12064	BAIAP2

## Sheet: Table S5
Table S5 The detali of KEGG pathways enriched in comparison group CK vs T1
Descrption	Pvalue	Qvalue	Pathway ID	Genes	K_IDs
Metabolic pathways	8.55017e-12	1.00037e-09	ko01100	FAW_000391(yrbE);FAW_000396(Taldo1);FAW_000829(Amy4N);FAW_000862(Hsd17b4);FAW_001126(Qdpr);FAW_001157(PLPP1);FAW_001658(pnbA);FAW_001665(B1);FAW_001666(Est-6);FAW_001731(HAO1);FAW_001856(ARG2);FAW_001921(Sardh);FAW_001925(b4gat1);FAW_001985(AAEL004701);FAW_002121(Prat);FAW_002122(ade5);FAW_002390(LanA);FAW_003083(scu);FAW_003209(PGD);FAW_003235(Phgdh);FAW_003358(Hn);FAW_003360(ppl);FAW_003521(Uro…	K00010+K00616+K01176+K12405+K00357+K01080+K01044+K01044+K01044+K11517+K01476+K00314+K21032+K01940+K00764+K01587+K06240+K08683+K00033+K00058+K00500+K02437+K00365+K00232+K00232+K00699+K01441+K08967+K01758+K01580+K01738+K16343+K01679+K00665+K00699+K00717+K01077+K01187+K13811+K10250+K00281+K01952+K01953+K00600+K00115+K00079+K00025+K00128+K22284+K14677+K00030+K01053+K11140+K01229+K13524+K01183+K01755+…
Glycine, serine and threonine metabolism	8.37202e-07	4.89763e-05	ko00260	FAW_000658(Gnmt);FAW_001921(Sardh);FAW_003235(Phgdh);FAW_003360(ppl);FAW_004905(CTH);FAW_006628(Gldc);FAW_007280(SHMT1);FAW_010916(PSPH);FAW_015017(AMT);FAW_015677(CBS);FAW_015722(tdcB);FAW_018404(AGXT2);FAW_020374(Ddo)	K00552+K00314+K00058+K02437+K01758+K00281+K00600+K01079+K00605+K01697+K01754+K00827+K00273
Metabolism of xenobiotics by cytochrome P450	1.36443e-06	5.32129e-05	ko00980	FAW_004608(--);FAW_005997(UGT2B14);FAW_006793(GST1);FAW_006795(GST1);FAW_008292(CBR1);FAW_013028(GstS1);FAW_013030(GstS1);FAW_013031(HPGDS);FAW_014618(GST1);FAW_014881(UGT3A1);FAW_014884(Ugt2b1);FAW_014885(UGT2B31);FAW_019269(Cbr3);FAW_019270(CBR1);FAW_021227(Gst1);FAW_021360(UGT2B13);FAW_022864(EGT);FAW_023068(EGT);MSTRG.11581(GST2)	K00699+K00699+K00799+K00799+K00079+K04097+K04097+K04097+K00799+K00699+K00699+K00699+K00079+K00079+K00799+K00699+K00699+K00699+K04097
Ascorbate and aldarate metabolism	1.71081e-05	0.000313184	ko00053	FAW_004608(--);FAW_005997(UGT2B14);FAW_008594(Aldh1b1);FAW_009654(RGN);FAW_014596(ALDH2);FAW_014881(UGT3A1);FAW_014884(Ugt2b1);FAW_014885(UGT2B31);FAW_014982(RGN);FAW_021360(UGT2B13);FAW_022864(EGT);FAW_023068(EGT);FAW_023261(ALDH1B1)	K00699+K00699+K00128+K01053+K00128+K00699+K00699+K00699+K01053+K00699+K00699+K00699+K00128
Pentose phosphate pathway	0.000866665	0.01014	ko00030	FAW_000396(Taldo1);FAW_003209(PGD);FAW_007844(Gld);FAW_009654(RGN);FAW_014619(Prps1);FAW_014982(RGN);FAW_015271(Tktl2);FAW_023242(TKTL1)	K00616+K00033+K00115+K01053+K00948+K01053+K00615+K00615
Insect hormone biosynthesis	0.00145402	0.0154655	ko00981	FAW_007744(SDR-1);FAW_008594(Aldh1b1);FAW_010255(phm);FAW_014596(ALDH2);FAW_016028(JHEH);FAW_016029(JHEH);FAW_023261(ALDH1B1)	K15890+K00128+K10720+K00128+K10719+K10719+K00128
Biosynthesis of amino acids	0.00331411	0.0276965	ko01230	FAW_000396(Taldo1);FAW_001856(ARG2);FAW_001985(AAEL004701);FAW_003235(Phgdh);FAW_003358(Hn);FAW_004905(CTH);FAW_005054(PCAS-1);FAW_007280(SHMT1);FAW_008679(Acy1);FAW_008976(--);FAW_010198(ASL);FAW_010916(PSPH);FAW_014619(Prps1);FAW_015271(Tktl2);FAW_015677(CBS);FAW_015722(tdcB);FAW_018476(GPT);FAW_023242(TKTL1)	K00616+K01476+K01940+K00058+K00500+K01758+K01738+K00600+K14677+K00030+K01755+K01079+K00948+K00615+K01697+K01754+K00814+K00615
Glutathione metabolism	0.00452926	0.0353282	ko00480	FAW_003209(PGD);FAW_006793(GST1);FAW_006795(GST1);FAW_009498(CSA);FAW_009718(ANPEP);FAW_013028(GstS1);FAW_013030(GstS1);FAW_013031(HPGDS);FAW_014618(GST1);FAW_021227(Gst1);MSTRG.11581(GST2)	K00033+K00799+K00799+K05361+K11140+K04097+K04097+K04097+K00799+K00799+K04097
Fatty acid degradation	0.0063331	0.0435867	ko00071	FAW_004268(CG5009);FAW_004269(CG5009);FAW_005349(Eci1);FAW_008594(Aldh1b1);FAW_014596(ALDH2);FAW_018487(ACAA2);FAW_018490(ACAA2);FAW_023261(ALDH1B1)	K00232+K00232+K13238+K00128+K00128+K07508+K07508+K00128

## Sheet: Table S6
Table S6 The detali of KEGG pathways enriched in comparison group CK vs T2
Descrption	Pvalue	Qvalue	Pathway ID	Genes	K_IDs
Metabolic pathways	5.36404e-14	6.97325e-12	ko01100	FAW_000046(Las);FAW_000057(cN-IIIB);FAW_000105(--);FAW_000391(yrbE);FAW_000396(Taldo1);FAW_000398(eas);FAW_000402(Uqcrq);FAW_000498(Pik3c2a);FAW_000617(ELOVL4);FAW_000636(VHA16);FAW_000767(Aldh3a2);FAW_000829(Amy4N);FAW_000862(Hsd17b4);FAW_000871(FDPS);FAW_000874(FDPS);FAW_001126(Qdpr);FAW_001279(EGT);FAW_001460(CG34384);FAW_001499(GOT1);FAW_001658(pnbA);FAW_001661(pnbA);FAW_001662(B1);FAW_001663…	K03644+K01081+K01922+K00010+K00616+K00894+K00418+K00923+K10249+K02155+K00128+K01176+K12405+K00787+K00787+K00357+K00699+K00901+K14454+K01044+K01044+K01044+K01044+K01044+K01044+K11517+K01968+K08660+K01476+K13509+K13509+K18081+K00314+K21032+K01432+K00927+K11153+K00764+K01587+K01922+K01647+K01915+K08683+K01803+K01895+K00033+K00058+K00500+K02437+K00939+K00036+K00547+K11155+K02146+K01229+K14455+K02140+…
Insect hormone biosynthesis	2.90912e-06	9.45465e-05	ko00981	FAW_000767(Aldh3a2);FAW_007744(SDR-1);FAW_008594(Aldh1b1);FAW_008632(JHAMT);FAW_009548(--);FAW_010258(Cyp18a1);FAW_010654(daf-36);FAW_012125(JHEH);FAW_012996(ALDH1A1);FAW_012997(Aldh1a7);FAW_012998(ALDH1A1);FAW_014596(ALDH2);FAW_016028(JHEH);FAW_016029(JHEH);FAW_023261(ALDH1B1)	K00128+K15890+K00128+K10718+K21013+K14985+K14938+K10719+K00128+K00128+K00128+K00128+K10719+K10719+K00128
Fatty acid degradation	4.89621e-05	0.000870652	ko00071	FAW_000767(Aldh3a2);FAW_004263(CG5009);FAW_004267(CG5009);FAW_004268(CG5009);FAW_004269(CG5009);FAW_008594(Aldh1b1);FAW_008625(CPT2);FAW_009577(ACADSB);FAW_011275(ACOX3);FAW_012996(ALDH1A1);FAW_012997(Aldh1a7);FAW_012998(ALDH1A1);FAW_014596(ALDH2);FAW_017577(ech-6);FAW_018450(ADH5);FAW_018487(ACAA2);FAW_018490(ACAA2);FAW_023261(ALDH1B1)	K00128+K00232+K00232+K00232+K00232+K00128+K08766+K09478+K00232+K00128+K00128+K00128+K00128+K07511+K00121+K07508+K07508+K00128
Biosynthesis of amino acids	0.000277809	0.00392833	ko01230	FAW_000396(Taldo1);FAW_001499(GOT1);FAW_001856(ARG2);FAW_002015(Pgk);FAW_002934(AAEL002956);FAW_002961(Gs2);FAW_003112(Tpi);FAW_003235(Phgdh);FAW_003358(Hn);FAW_003947(Got2);FAW_004535(Pfk);FAW_004682(CTH);FAW_004905(CTH);FAW_005055(RCS1);FAW_006416(Acy1);FAW_006882(--);FAW_007280(SHMT1);FAW_007664(PGAM1);FAW_008679(Acy1);FAW_008976(--);FAW_009163(Aldh18a1);FAW_010284(Idh1);FAW_010990(Eno);FAW_01…	K00616+K14454+K01476+K00927+K01647+K01915+K01803+K00058+K00500+K14455+K00850+K01758+K01758+K01738+K14677+K00030+K00600+K01834+K14677+K00030+K12657+K00031+K01689+K01623+K01623+K00134+K00873+K00831+K00948+K00615+K00030+K01697+K01754+K00030+K00814+K00814+K14677+K00615
Glycerolipid metabolism	0.000302179	0.00392833	ko00561	FAW_000767(Aldh3a2);FAW_001460(CG34384);FAW_001899(AGPAT2);FAW_001900(AGPAT2);FAW_003731(Dgat1);FAW_004387(Pla1a);FAW_006559(AGPAT3);FAW_007109(Akr1b1);FAW_007692(akr2e);FAW_008419(Tkfc);FAW_008594(Aldh1b1);FAW_008605(Lipg);FAW_009853(GPAM);FAW_012996(ALDH1A1);FAW_012997(Aldh1a7);FAW_012998(ALDH1A1);FAW_014596(ALDH2);FAW_016554(GK3P);FAW_020523(akr2e);FAW_021302(akr2e);FAW_021560(AKR1B1);FAW_0222…	K00128+K00901+K13509+K13509+K11155+K14073+K13523+K00011+K00011+K00863+K00128+K22284+K00629+K00128+K00128+K00128+K00128+K00864+K00011+K00011+K00011+K22284+K00128
Galactose metabolism	0.000626173	0.00678354	ko00052	FAW_003935(LCT);FAW_004535(Pfk);FAW_006404(Mal-B2);FAW_007109(Akr1b1);FAW_007692(akr2e);FAW_008789(LCT);FAW_009800(LCT);FAW_010624(Galt);FAW_012611(Pgm);FAW_014754(LCT);FAW_017603(GALK1);FAW_018286(GALM);FAW_019296(Mal-A1);FAW_019773(UGP2);FAW_020523(akr2e);FAW_021302(akr2e);FAW_021433(HK2);FAW_021560(AKR1B1)	K01229+K00850+K01187+K00011+K00011+K01229+K01229+K00965+K01835+K01229+K00849+K01785+K01187+K00963+K00011+K00011+K00844+K00011
Pentose phosphate pathway	0.000783258	0.00727312	ko00030	FAW_000396(Taldo1);FAW_003209(PGD);FAW_003565(Zw);FAW_004535(Pfk);FAW_009653(RGN);FAW_009654(RGN);FAW_011415(Ald);FAW_011416(Ald);FAW_012611(Pgm);FAW_014619(Prps1);FAW_015271(Tktl2);FAW_021150(Pgi);FAW_023242(TKTL1)	K00616+K00033+K00036+K00850+K01053+K01053+K01623+K01623+K01835+K00948+K00615+K01810+K00615
Phagosome	0.0032758	0.0224133	ko04145	FAW_000636(VHA16);FAW_000659(SEC61G);FAW_003485(Itgb4);FAW_003640(SEC61B);FAW_003790(VhaAC39-1);FAW_005512(VhaSFD);FAW_005576(Itgbn);FAW_005738(VHAA);FAW_005899(Vha36-1);FAW_006426(Atp6v0b);FAW_008910(VHA55);FAW_009673(Cp1);FAW_010055(Mbl1);FAW_012765(ATP6V0A1);FAW_012927(ATP6V0A1);FAW_014988(VHA26);FAW_016043(atp6v1c1a);FAW_016665(Act88F);FAW_017143(VHA14);FAW_017291(Vha13);FAW_019580(ATP6V0E2);…	K02155+K07342+K05719+K09481+K02146+K02144+K05719+K02145+K02149+K03661+K02147+K01365+K06560+K02154+K02154+K02150+K02148+K05692+K02151+K02152+K02153+K00914
Ascorbate and aldarate metabolism	0.00489403	0.0275994	ko00053	FAW_000767(Aldh3a2);FAW_001279(EGT);FAW_008594(Aldh1b1);FAW_009653(RGN);FAW_009654(RGN);FAW_011446(Miox);FAW_011447(miox);FAW_012103(EGT);FAW_012996(ALDH1A1);FAW_012997(Aldh1a7);FAW_012998(ALDH1A1);FAW_014596(ALDH2);FAW_014880(UGT2B10);FAW_014885(UGT2B31);FAW_021360(UGT2B13);FAW_023261(ALDH1B1)	K00128+K00699+K00128+K01053+K01053+K00469+K00469+K00699+K00128+K00128+K00128+K00128+K00699+K00699+K00699+K00128
Peroxisome	0.00507688	0.0275994	ko04146	FAW_000862(Hsd17b4);FAW_001063(PEX11A);FAW_001114(DDO);FAW_001116(DDO);FAW_001731(HAO1);FAW_003022(Cat);FAW_003654(CRAT);FAW_004263(CG5009);FAW_004267(CG5009);FAW_004268(CG5009);FAW_004269(CG5009);FAW_004437(HMGCL);FAW_005249(Slc25a17);FAW_005489(HACL1);FAW_005970(PHYH);FAW_006393(ABCD3);FAW_010057(FAR1);FAW_010284(Idh1);FAW_011201(PXMP2);FAW_011275(ACOX3);FAW_011647(wat);FAW_011838(FAR1);FAW_014…	K12405+K13352+K00272+K00272+K11517+K03781+K00624+K00232+K00232+K00232+K00232+K01640+K13354+K12261+K00477+K05677+K13356+K00031+K13347+K00232+K13356+K13356+K04565+K00477+K00477+K00477+K13353+K13353+K08764+K13279+K00106+K13356+K13356+K00273+K11147+K00830
Starch and sucrose metabolism	0.00509527	0.0275994	ko00500	FAW_000829(Amy4N);FAW_006404(Mal-B2);FAW_008702(GlyP);FAW_011607(GlyS);FAW_012611(Pgm);FAW_012706(GBE1);FAW_018911(Amy35);FAW_019296(Mal-A1);FAW_019773(UGP2);FAW_021150(Pgi);FAW_021433(HK2)	K01176+K01187+K00688+K00693+K01835+K00700+K01176+K01187+K00963+K01810+K00844
Biosynthesis of unsaturated fatty acids	0.00509527	0.0275994	ko01040	FAW_004263(CG5009);FAW_004267(CG5009);FAW_004268(CG5009);FAW_004269(CG5009);FAW_004561(art-1);FAW_011275(ACOX3);FAW_019701(SCD);FAW_019704(Scd1);FAW_019707(SCD5);FAW_022664(hacd3);FAW_022929(hacd3)	K00232+K00232+K00232+K00232+K10258+K00232+K00507+K00507+K00507+K10703+K10703
alpha-Linolenic acid metabolism	0.00541461	0.028156	ko00592	FAW_004263(CG5009);FAW_004267(CG5009);FAW_004268(CG5009);FAW_004269(CG5009);FAW_005369(PLA2G6);FAW_011275(ACOX3);FAW_012761(PLB1)	K00232+K00232+K00232+K00232+K16343+K00232+K14621
Apoptosis	0.00743144	0.0371572	ko04215	FAW_000207(--);FAW_003411(casp3);FAW_005500(Cyt-c-p);FAW_008839(HtrA2);FAW_013219(--);FAW_015418(BIRC6);FAW_022938(--)	K16679+K04397+K08738+K08669+K08731+K10586+K04397

## Sheet: Table S7
Table S7 Genes involved in pathways analysed by GSEA
MAPK
NAME	PROBE	DESCRIPTION<br>(from dataset)	GENE SYMBOL	GENE_TITLE	RANK IN GENE LIST	RANK METRIC SCOR	RUNNING ES	CORE ENRICHMENT
row_0	FAW_014645	FAW_014645	RASA1	NULL	52	2.38332	0.0219	Yes
row_1	FAW_014935	FAW_014935	CIC	NULL	215	1.90612	0.0342	Yes
row_2	FAW_016153	FAW_016153	MAP3K4	NULL	384	1.72959	0.0446	Yes
row_3	FAW_020273	FAW_020273	SOS	NULL	409	1.70815	0.0608	Yes
row_4	FAW_001210	FAW_001210	JUN	NULL	444	1.67835	0.0763	Yes
row_5	FAW_012450	FAW_012450	--	NULL	482	1.65304	0.0915	Yes
row_6	FAW_001028	FAW_001028	SRC42A	NULL	516	1.63127	0.1065	Yes
row_7	FAW_005705	FAW_005705	--	NULL	560	1.60871	0.121	Yes
row_8	FAW_003073	FAW_003073	DOS	NULL	564	1.6077	0.1371	Yes
row_9	FAW_007148	FAW_007148	MAP2K4	NULL	598	1.59143	0.1518	Yes
row_10	FAW_001026	FAW_001026	SRC42A	NULL	613	1.58327	0.1672	Yes
row_11	FAW_002736	FAW_002736	IPO7	NULL	618	1.5819	0.183	Yes
row_12	FAW_017066	FAW_017066	DSOR1	NULL	620	1.58145	0.1989	Yes
row_13	FAW_001816	FAW_001816	MIG-15	NULL	717	1.53894	0.2104	Yes
row_14	FAW_015514	FAW_015514	KAY	NULL	731	1.53279	0.2253	Yes
row_15	FAW_005795	FAW_005795	--	NULL	757	1.51681	0.2396	Yes
row_16	FAW_020450	FAW_020450	CNK3/IPCEF1	NULL	801	1.49098	0.2528	Yes
row_17	FAW_000207	FAW_000207	--	NULL	860	1.47083	0.2652	Yes
row_18	FAW_006821	FAW_006821	SIAH2	NULL	975	1.43149	0.2748	Yes
row_19	FAW_013086	FAW_013086	RAC1	NULL	976	1.4308	0.2893	Yes
row_20	FAW_004359	FAW_004359	SHC1	NULL	1079	1.3965	0.299	Yes
row_21	FAW_005581	FAW_005581	MAP3K7	NULL	1253	1.33889	0.3052	Yes
row_22	FAW_000493	FAW_000493	STY	NULL	1348	1.31186	0.3145	Yes
row_23	FAW_008569	FAW_008569	MAP3K15	NULL	1474	1.27473	0.3221	Yes
row_24	FAW_019959	FAW_019959	SLPR	NULL	1502	1.26814	0.3337	Yes
row_25	FAW_015362	FAW_015362	PPM1B	NULL	1512	1.2662	0.3461	Yes
row_26	FAW_020276	FAW_020276	PTPRR	NULL	1553	1.25804	0.3571	Yes
row_27	FAW_002124	FAW_002124	MAP2K7	NULL	1557	1.25712	0.3697	Yes
row_28	FAW_008651	FAW_008651	DPP	NULL	1623	1.24309	0.3795	Yes
row_29	FAW_001674	FAW_001674	RASGAP1	NULL	1647	1.23753	0.391	Yes
row_30	FAW_004318	FAW_004318	MEF2	NULL	1663	1.23569	0.4029	Yes
row_31	FAW_007051	FAW_007051	DRK	NULL	1705	1.22978	0.4136	Yes
row_32	FAW_004698	FAW_004698	SHARK	NULL	1824	1.20603	0.4207	Yes
row_33	FAW_012566	FAW_012566	BSK	NULL	1870	1.19855	0.4309	Yes
row_34	FAW_003866	FAW_003866	CYLD	NULL	2004	1.17241	0.4371	Yes
row_35	FAW_017146	FAW_017146	--	NULL	2011	1.17135	0.4487	Yes
row_36	FAW_008758	FAW_008758	XPO1	NULL	2078	1.15489	0.4576	Yes
row_37	FAW_009160	FAW_009160	DOK2	NULL	2206	1.13334	0.4636	Yes
row_38	FAW_017396	FAW_017396	GRO	NULL	2213	1.13242	0.4748	Yes
row_39	FAW_011020	FAW_011020	DUOX	NULL	2381	1.10421	0.4789	Yes
row_40	FAW_000273	FAW_000273	AOP	NULL	2523	1.07952	0.4838	Yes
row_41	FAW_002775	FAW_002775	EGFR	NULL	2544	1.07592	0.4938	Yes
row_42	FAW_019355	FAW_019355	--	NULL	2645	1.05625	0.5002	Yes
row_43	FAW_011151	FAW_011151	MAPK1	NULL	2696	1.0472	0.5087	Yes
row_44	FAW_001821	FAW_001821	--	NULL	2828	1.02961	0.5135	Yes
row_45	FAW_016738	FAW_016738	KSR2	NULL	2932	1.01654	0.5194	Yes
row_46	FAW_001027	FAW_001027	--	NULL	2992	1.00329	0.5271	Yes
row_47	FAW_001853	FAW_001853	--	NULL	3044	0.992835	0.5349	Yes
row_48	FAW_020362	FAW_020362	RAS85D	NULL	3152	0.977523	0.5403	Yes
row_49	FAW_020413	FAW_020413	--	NULL	3254	0.962587	0.5457	Yes
row_50	FAW_002172	FAW_002172	RAF	NULL	3342	0.950442	0.5516	Yes
row_51	FAW_020910	FAW_020910	SPI	NULL	3394	0.942215	0.559	Yes
row_52	FAW_004737	FAW_004737	P38B	NULL	3402	0.94133	0.5682	Yes
row_53	FAW_015469	FAW_015469	PROS	NULL	3463	0.934791	0.5751	Yes
row_54	FAW_001687	FAW_001687	TTK	NULL	3491	0.930419	0.5833	Yes
row_55	FAW_015662	FAW_015662	ETS2	NULL	3509	0.927749	0.592	Yes
row_56	FAW_016736	FAW_016736	--	NULL	3552	0.922742	0.5995	Yes
row_57	FAW_012675	FAW_012675	PPP2CA	NULL	3780	0.891158	0.5989	Yes
row_58	FAW_020550	FAW_020550	ATF2	NULL	3938	0.869434	0.601	Yes
row_59	FAW_008629	FAW_008629	STRN3	NULL	4026	0.856751	0.6059	Yes
row_60	FAW_005007	FAW_005007	SRC64B	NULL	4240	0.827264	0.6053	Yes
row_61	FAW_017021	FAW_017021	AOS	NULL	4324	0.815665	0.61	Yes
row_62	FAW_017552	FAW_017552	MAP2K6	NULL	4545	0.791076	0.6086	Yes
row_63	FAW_016387	FAW_016387	RAC1	NULL	4570	0.787134	0.6156	Yes
row_64	FAW_008553	FAW_008553	EFF	NULL	4637	0.778084	0.6206	Yes
row_65	FAW_017448	FAW_017448	--	NULL	4937	0.734849	0.6153	Yes
row_66	FAW_012570	FAW_012570	BMPR1B	NULL	5167	0.702116	0.6127	Yes
row_67	FAW_000289	FAW_000289	BTK29A	NULL	5557	0.654966	0.6028	Yes
row_68	FAW_003410	FAW_003410	--	NULL	5634	0.646019	0.6061	Yes
row_69	FAW_004802	FAW_004802	--	NULL	6168	0.57671	0.5893	Yes
row_70	FAW_014487	FAW_014487	SIAH1A	NULL	6240	0.567326	0.592	Yes
row_71	FAW_001852	FAW_001852	--	NULL	6725	0.501555	0.5765	Yes
row_72	FAW_020411	FAW_020411	--	NULL	6753	0.498932	0.5804	Yes
row_73	FAW_019654	FAW_019654	--	NULL	6838	0.488381	0.5818	Yes
row_74	FAW_020880	FAW_020880	--	NULL	6854	0.48603	0.5861	Yes
row_75	FAW_000126	FAW_000126	PTPN11	NULL	6856	0.485791	0.5909	Yes
row_76	FAW_009394	FAW_009394	ROS1	NULL	7079	0.457608	0.5861	Yes
row_77	FAW_011869	FAW_011869	--	NULL	7274	0.435108	0.5823	Yes
row_78	FAW_011544	FAW_011544	--	NULL	7471	0.408774	0.5781	Yes
row_79	FAW_016986	FAW_016986	PTPN11	NULL	7514	0.402998	0.5804	Yes
row_80	FAW_004425	FAW_004425	14-3-3ZETA	NULL	7576	0.395505	0.5818	Yes
row_81	FAW_023089	FAW_023089	--	NULL	7780	0.370478	0.5769	Yes
row_82	FAW_006953	FAW_006953	--	NULL	7862	0.359201	0.5771	Yes
row_83	FAW_022245	FAW_022245	IPO7	NULL	8154	0.329991	0.5681	Yes
row_84	FAW_018743	FAW_018743	TSL	NULL	8501	0.290705	0.5563	Yes
row_85	FAW_011354	FAW_011354	BI	NULL	8846	0.252891	0.5442	Yes
row_86	FAW_018742	FAW_018742	TSL	NULL	8924	0.243869	0.5434	Yes
row_87	FAW_010038	FAW_010038	--	NULL	9584	0.174294	0.5172	Yes
row_88	FAW_007606	FAW_007606	--	NULL	9911	0.138247	0.5048	Yes
row_89	FAW_009264	FAW_009264	--	NULL	10266	0.0949694	0.4907	Yes
row_90	FAW_008414	FAW_008414	--	NULL	10697	0.0407877	0.4728	Yes
row_91	FAW_000077	FAW_000077	--	NULL	10950	0	0.4621	No
row_92	FAW_001631	FAW_001631	--	NULL	11381	0	0.4439	No
row_93	FAW_002301	FAW_002301	--	NULL	11544	0	0.437	No
row_94	FAW_002434	FAW_002434	--	NULL	11618	0	0.4339	No
row_95	FAW_002643	FAW_002643	NR2E1	NULL	11757	0	0.428	No
row_96	FAW_002857	FAW_002857	--	NULL	11877	0	0.423	No
row_97	FAW_003016	FAW_003016	--	NULL	11936	0	0.4205	No
row_98	FAW_003248	FAW_003248	--	NULL	12030	0	0.4166	No
row_99	FAW_003461	FAW_003461	--	NULL	12113	0	0.4131	No
row_100	FAW_004081	FAW_004081	--	NULL	12251	0	0.4073	No
row_101	FAW_004098	FAW_004098	--	NULL	12260	0	0.4069	No
row_102	FAW_004242	FAW_004242	--	NULL	12301	0	0.4052	No
row_103	FAW_004295	FAW_004295	--	NULL	12317	0	0.4046	No
row_104	FAW_004377	FAW_004377	--	NULL	12334	0	0.4039	No
row_105	FAW_004899	FAW_004899	--	NULL	12443	0	0.3993	No
row_106	FAW_005625	FAW_005625	--	NULL	12642	0	0.3909	No
row_107	FAW_005935	FAW_005935	--	NULL	12723	0	0.3875	No
row_108	FAW_006083	FAW_006083	--	NULL	12757	0	0.3861	No
row_109	FAW_006413	FAW_006413	--	NULL	12896	0	0.3803	No
row_110	FAW_008916	FAW_008916	--	NULL	13646	0	0.3485	No
row_111	FAW_009549	FAW_009549	--	NULL	13846	0	0.34	No
row_112	FAW_010347	FAW_010347	--	NULL	14055	0	0.3312	No
row_113	FAW_010757	FAW_010757	--	NULL	14231	0	0.3237	No
row_114	FAW_010869	FAW_010869	--	NULL	14280	0	0.3217	No
row_115	FAW_010870	FAW_010870	--	NULL	14281	0	0.3217	No
row_116	FAW_011563	FAW_011563	--	NULL	14449	0	0.3146	No
row_117	FAW_011576	FAW_011576	--	NULL	14455	0	0.3144	No
row_118	FAW_011605	FAW_011605	--	NULL	14473	0	0.3137	No
row_119	FAW_011786	FAW_011786	--	NULL	14553	0	0.3103	No
row_120	FAW_011787	FAW_011787	--	NULL	14554	0	0.3103	No
row_121	FAW_011854	FAW_011854	--	NULL	14587	0	0.309	No
row_122	FAW_013851	FAW_013851	SODA	NULL	15570	0	0.2673	No
row_123	FAW_014967	FAW_014967	--	NULL	16223	0	0.2396	No
row_124	FAW_016482	FAW_016482	--	NULL	16693	0	0.2197	No
row_125	FAW_016489	FAW_016489	--	NULL	16698	0	0.2195	No
row_126	FAW_016510	FAW_016510	--	NULL	16707	0	0.2192	No
row_127	FAW_016735	FAW_016735	KSR2	NULL	16772	0	0.2164	No
row_128	FAW_016756	FAW_016756	--	NULL	16777	0	0.2163	No
row_129	FAW_017382	FAW_017382	--	NULL	17018	0	0.2061	No
row_130	FAW_017446	FAW_017446	--	NULL	17042	0	0.2051	No
row_131	FAW_018832	FAW_018832	--	NULL	17516	0	0.185	No
row_132	FAW_019437	FAW_019437	--	NULL	17717	0	0.1765	No
row_133	FAW_020083	FAW_020083	--	NULL	17968	0	0.1659	No
row_134	FAW_020710	FAW_020710	--	NULL	18208	0	0.1557	No
row_135	FAW_009142	FAW_009142	--	NULL	19505	-0.0156129	0.1009	No
row_136	FAW_018117	FAW_018117	--	NULL	19506	-0.0156129	0.101	No
row_137	FAW_018264	FAW_018264	--	NULL	19507	-0.0156129	0.1012	No
row_138	FAW_020476	FAW_020476	--	NULL	19508	-0.0156129	0.1013	No
row_139	FAW_005597	FAW_005597	LZ	NULL	19716	-0.0477274	0.093	No
row_140	FAW_002498	FAW_002498	--	NULL	20275	-0.129332	0.0706	No
row_141	FAW_014756	FAW_014756	--	NULL	20357	-0.139964	0.0686	No
row_142	FAW_003309	FAW_003309	--	NULL	20652	-0.182413	0.058	No
row_143	FAW_010854	FAW_010854	--	NULL	20768	-0.198207	0.0551	No
row_144	FAW_005797	FAW_005797	--	NULL	20801	-0.204501	0.0558	No
row_145	FAW_018137	FAW_018137	--	NULL	20815	-0.204501	0.0573	No
row_146	FAW_003805	FAW_003805	CHIC	NULL	20840	-0.208682	0.0584	No
row_147	FAW_000571	FAW_000571	TRAF7	NULL	21003	-0.233094	0.0539	No
row_148	FAW_005334	FAW_005334	--	NULL	21776	-0.394863	0.0251	No
row_149	FAW_001734	FAW_001734	RHOL	NULL	21898	-0.428839	0.0243	No
row_150	FAW_000981	FAW_000981	--	NULL	21992	-0.454571	0.0249	No
row_151	FAW_012702	FAW_012702	SOD-2	NULL	22078	-0.485047	0.0262	No
row_152	FAW_011357	FAW_011357	BI	NULL	22109	-0.494872	0.0299	No
row_153	FAW_015470	FAW_015470	PROS	NULL	22185	-0.526175	0.0321	No
row_154	FAW_005089	FAW_005089	--	NULL	22728	-0.822908	0.0174	No
row_155	FAW_003277	FAW_003277	--	NULL	22820	-0.887398	0.0225	No
row_156	FAW_001148	FAW_001148	TOR	NULL	23366	-1.48808	0.0144	No
Apoptosis
NAME	PROBE	DESCRIPTION<br>(from dataset)	GENE SYMBOL	GENE_TITLE	RANK IN GENE LIST	RANK METRIC SCOR	RUNNING ES	CORE ENRICHMENT
row_0	FAW_015418	FAW_015418	BIRC6	NULL	192	1.93502	0.0266	Yes
row_1	FAW_002183	FAW_002183	EIP74EF	NULL	288	1.81607	0.0551	Yes
row_2	FAW_003411	FAW_003411	CASP3	NULL	439	1.68274	0.0789	Yes
row_3	FAW_001210	FAW_001210	JUN	NULL	444	1.67835	0.1088	Yes
row_4	FAW_005705	FAW_005705	--	NULL	560	1.60871	0.1328	Yes
row_5	FAW_022938	FAW_022938	--	NULL	659	1.56365	0.1567	Yes
row_6	FAW_015514	FAW_015514	KAY	NULL	731	1.53279	0.1812	Yes
row_7	FAW_000207	FAW_000207	--	NULL	860	1.47083	0.2021	Yes
row_8	FAW_005581	FAW_005581	MAP3K7	NULL	1253	1.33889	0.2095	Yes
row_9	FAW_020728	FAW_020728	RNF121	NULL	1357	1.30889	0.2286	Yes
row_10	FAW_008569	FAW_008569	MAP3K15	NULL	1474	1.27473	0.2466	Yes
row_11	FAW_002124	FAW_002124	MAP2K7	NULL	1557	1.25712	0.2656	Yes
row_12	FAW_011283	FAW_011283	TRAF4	NULL	1695	1.23134	0.2819	Yes
row_13	FAW_019884	FAW_019884	PEK	NULL	1771	1.21668	0.3006	Yes
row_14	FAW_012566	FAW_012566	BSK	NULL	1870	1.19855	0.3179	Yes
row_15	FAW_013078	FAW_013078	WTS	NULL	1886	1.19587	0.3387	Yes
row_16	FAW_004157	FAW_004157	STK3	NULL	2166	1.13977	0.3473	Yes
row_17	FAW_016714	FAW_016714	BR	NULL	2283	1.12113	0.3625	Yes
row_18	FAW_003716	FAW_003716	ATM	NULL	2291	1.12015	0.3823	Yes
row_19	FAW_008839	FAW_008839	HTRA2	NULL	2303	1.11685	0.4019	Yes
row_20	FAW_006649	FAW_006649	BR	NULL	2375	1.10554	0.4187	Yes
row_21	FAW_002775	FAW_002775	EGFR	NULL	2544	1.07592	0.4309	Yes
row_22	FAW_005754	FAW_005754	EIF5	NULL	2667	1.0525	0.4446	Yes
row_23	FAW_011151	FAW_011151	MAPK1	NULL	2696	1.0472	0.4621	Yes
row_24	FAW_014461	FAW_014461	CASP2	NULL	2820	1.03087	0.4754	Yes
row_25	MSTRG.882	MSTRG.882	--	NULL	3086	0.986426	0.4819	Yes
row_26	FAW_020362	FAW_020362	RAS85D	NULL	3152	0.977523	0.4967	Yes
row_27	FAW_005132	FAW_005132	ATFC	NULL	3161	0.976482	0.5138	Yes
row_28	FAW_003567	FAW_003567	USP	NULL	3287	0.958294	0.5257	Yes
row_29	FAW_010054	FAW_010054	ECR	NULL	3291	0.958054	0.5428	Yes
row_30	FAW_002172	FAW_002172	RAF	NULL	3342	0.950442	0.5577	Yes
row_31	FAW_020949	FAW_020949	CASP7	NULL	3628	0.910413	0.562	Yes
row_32	FAW_020764	FAW_020764	AIFM1	NULL	3837	0.884605	0.569	Yes
row_33	FAW_009758	FAW_009758	BTF3L4	NULL	3862	0.881091	0.5838	Yes
row_34	FAW_007248	FAW_007248	MEI-41	NULL	3913	0.873308	0.5973	Yes
row_35	FAW_003713	FAW_003713	--	NULL	4140	0.841097	0.6029	Yes
row_36	FAW_009248	FAW_009248	--	NULL	4152	0.839389	0.6174	Yes
row_37	FAW_000270	FAW_000270	DNM1L	NULL	4411	0.806038	0.621	Yes
row_38	FAW_010280	FAW_010280	DRICE	NULL	5187	0.699916	0.6007	Yes
row_39	FAW_015670	FAW_015670	SAV	NULL	5375	0.677676	0.605	Yes
row_40	FAW_020616	FAW_020616	--	NULL	5861	0.614741	0.5955	Yes
row_41	FAW_004690	FAW_004690	LAMC	NULL	5877	0.612362	0.6058	Yes
row_42	FAW_004802	FAW_004802	--	NULL	6168	0.57671	0.6039	Yes
row_43	FAW_014502	FAW_014502	MARF	NULL	6547	0.525716	0.5973	Yes
row_44	FAW_016713	FAW_016713	BR	NULL	6675	0.507947	0.6011	Yes
row_45	FAW_016712	FAW_016712	--	NULL	7162	0.447941	0.5886	Yes
row_46	FAW_012878	FAW_012878	PRDX4	NULL	7185	0.445719	0.5956	Yes
row_47	FAW_010053	FAW_010053	ECR	NULL	8184	0.327689	0.5593	Yes
row_48	FAW_009812	FAW_009812	--	NULL	9564	0.174458	0.5041	Yes
row_49	FAW_006822	FAW_006822	PARP	NULL	9859	0.140929	0.4942	Yes
row_50	FAW_006823	FAW_006823	--	NULL	13034	0	0.36	No
row_51	FAW_009732	FAW_009732	TSPO	NULL	20531	-0.165548	0.0459	No
row_52	FAW_011282	FAW_011282	--	NULL	20611	-0.177078	0.0458	No
row_53	FAW_010118	FAW_010118	MIRO	NULL	20858	-0.210986	0.0391	No
row_54	FAW_000571	FAW_000571	TRAF7	NULL	21003	-0.233094	0.0372	No
row_55	FAW_006824	FAW_006824	PARP	NULL	22773	-0.853988	-0.0223	No
row_56	FAW_005500	FAW_005500	CYT-C-P	NULL	23262	-1.32017	-0.0192	No
row_57	FAW_009733	FAW_009733	TSPO	NULL	23579	-2.11389	0.0053	No
Autophagy
NAME	PROBE	DESCRIPTION<br>(from dataset)	GENE SYMBOL	GENE_TITLE	RANK IN GENE LIST	RANK METRIC SCOR	RUNNING ES	CORE ENRICHMENT
row_0	FAW_005655	FAW_005655	TOR	NULL	528	1.62586	0.0328	Yes
row_1	FAW_019125	FAW_019125	PIK3R4	NULL	969	1.43441	0.0629	Yes
row_2	FAW_005214	FAW_005214	GABARAP	NULL	1087	1.39359	0.1052	Yes
row_3	MSTRG.16598	MSTRG.16598	MTOR	NULL	1318	1.32001	0.1403	Yes
row_4	FAW_010994	FAW_010994	UNC-51	NULL	1651	1.23712	0.1682	Yes
row_5	FAW_003281	FAW_003281	ATG13	NULL	1831	1.20483	0.2015	Yes
row_6	FAW_007446	FAW_007446	ATG16	NULL	1925	1.1882	0.2379	Yes
row_7	FAW_012186	FAW_012186	ATG13	NULL	1975	1.17647	0.2758	Yes
row_8	FAW_017694	FAW_017694	RPTOR	NULL	2140	1.14358	0.3076	Yes
row_9	FAW_015693	FAW_015693	ATG4D	NULL	2229	1.12934	0.3422	Yes
row_10	FAW_021140	FAW_021140	ATG6	NULL	2306	1.11642	0.3769	Yes
row_11	FAW_022728	FAW_022728	ATG2A	NULL	2359	1.10898	0.4123	Yes
row_12	FAW_013255	FAW_013255	WIPI2	NULL	2461	1.08937	0.445	Yes
row_13	FAW_003232	FAW_003232	ATG9A	NULL	2483	1.08546	0.4809	Yes
row_14	FAW_020846	FAW_020846	PIK3C3	NULL	2497	1.08294	0.5171	Yes
row_15	FAW_004061	FAW_004061	ATG3	NULL	2961	1.0105	0.5318	Yes
row_16	FAW_010928	FAW_010928	MLST8	NULL	3322	0.95286	0.5489	Yes
row_17	FAW_007440	FAW_007440	ATG16L1	NULL	3341	0.950718	0.5804	Yes
row_18	FAW_012675	FAW_012675	PPP2CA	NULL	3780	0.891158	0.5921	Yes
row_19	FAW_003544	FAW_003544	ATG4B	NULL	4097	0.846346	0.6075	Yes
row_20	FAW_001975	FAW_001975	ATG5	NULL	4163	0.838399	0.6332	Yes
row_21	FAW_022532	FAW_022532	PIK3C3	NULL	4351	0.813636	0.6529	Yes
row_22	FAW_003625	FAW_003625	--	NULL	5453	0.666841	0.629	Yes
row_23	FAW_004124	FAW_004124	IGBP1	NULL	5616	0.647684	0.6441	Yes
row_24	FAW_010886	FAW_010886	--	NULL	5641	0.644818	0.665	Yes
row_25	FAW_017025	FAW_017025	ATG7	NULL	6552	0.525346	0.6443	Yes
row_26	FAW_013166	FAW_013166	--	NULL	6922	0.478096	0.645	Yes
row_27	FAW_013217	FAW_013217	ATG12	NULL	7338	0.424988	0.6418	Yes
row_28	FAW_000075	FAW_000075	--	NULL	10948	0	0.4893	No
row_29	FAW_005452	FAW_005452	--	NULL	12601	0	0.4195	No
row_30	FAW_006457	FAW_006457	--	NULL	12913	0	0.4064	No
row_31	FAW_008814	FAW_008814	--	NULL	13593	0	0.3777	No
row_32	FAW_011614	FAW_011614	--	NULL	14477	0	0.3403	No
row_33	FAW_011789	FAW_011789	--	NULL	14556	0	0.337	No
row_34	FAW_012339	FAW_012339	--	NULL	14742	0	0.3292	No
row_35	FAW_013200	FAW_013200	--	NULL	14971	0	0.3196	No
row_36	FAW_014729	FAW_014729	--	NULL	16134	0	0.2705	No
row_37	FAW_016083	FAW_016083	--	NULL	16561	0	0.2525	No
row_38	FAW_020207	FAW_020207	--	NULL	18014	0	0.1911	No
row_39	FAW_020512	FAW_020512	--	NULL	18137	0	0.186	No
row_40	FAW_021400	FAW_021400	--	NULL	18457	0	0.1725	No
row_41	FAW_008028	FAW_008028	--	NULL	20287	-0.129332	0.0996	No
row_42	FAW_015754	FAW_015754	ATG2B	NULL	23263	-1.32063	0.0186	No
Endocytosis
NAME	PROBE	DESCRIPTION<br>(from dataset)	GENE SYMBOL	GENE_TITLE	RANK IN GENE LIST	RANK METRIC SCOR	RUNNING ES	CORE ENRICHMENT
row_0	FAW_002068	FAW_002068	ARRB1	NULL	31	2.54066	0.0188	Yes
row_1	FAW_020947	FAW_020947	PAR-6	NULL	131	2.06926	0.0309	Yes
row_2	FAW_018073	FAW_018073	IQSEC1	NULL	237	1.87934	0.0413	Yes
row_3	FAW_011769	FAW_011769	SNX6	NULL	245	1.86577	0.0557	Yes
row_4	FAW_019759	FAW_019759	USP8	NULL	267	1.83596	0.0693	Yes
row_5	FAW_001482	FAW_001482	WAS	NULL	320	1.77582	0.0812	Yes
row_6	FAW_011028	FAW_011028	GPRK1	NULL	375	1.73602	0.0926	Yes
row_7	FAW_007545	FAW_007545	VPS4B	NULL	378	1.73439	0.1062	Yes
row_8	FAW_012150	FAW_012150	CHMP4B	NULL	506	1.63758	0.1137	Yes
row_9	FAW_018858	FAW_018858	CHMP2B	NULL	508	1.63687	0.1266	Yes
row_10	FAW_004438	FAW_004438	RAB11FIP2	NULL	514	1.63213	0.1393	Yes
row_11	FAW_010202	FAW_010202	KHC	NULL	530	1.62503	0.1515	Yes
row_12	FAW_021624	FAW_021624	NEDD4	NULL	544	1.61912	0.1637	Yes
row_13	FAW_002794	FAW_002794	TGFBR1	NULL	569	1.60462	0.1754	Yes
row_14	FAW_016832	FAW_016832	ARFGEF1	NULL	629	1.57753	0.1853	Yes
row_15	FAW_001965	FAW_001965	SHI	NULL	643	1.57178	0.1972	Yes
row_16	FAW_007264	FAW_007264	SMURF2	NULL	669	1.55743	0.2084	Yes
row_17	FAW_015168	FAW_015168	HTL	NULL	673	1.55682	0.2206	Yes
row_18	FAW_019126	FAW_019126	SMAP2	NULL	716	1.53903	0.231	Yes
row_19	FAW_001966	FAW_001966	SHI	NULL	718	1.53879	0.2431	Yes
row_20	FAW_006424	FAW_006424	IST1	NULL	762	1.5113	0.2532	Yes
row_21	FAW_017855	FAW_017855	CBL	NULL	931	1.44562	0.2575	Yes
row_22	FAW_012905	FAW_012905	STAMBPA	NULL	948	1.44093	0.2682	Yes
row_23	FAW_010084	FAW_010084	PARD3	NULL	951	1.44051	0.2795	Yes
row_24	FAW_019245	FAW_019245	PIP5K1A	NULL	995	1.42394	0.2889	Yes
row_25	FAW_004822	FAW_004822	ARRB1	NULL	1085	1.39552	0.2962	Yes
row_26	FAW_012871	FAW_012871	SNX4	NULL	1097	1.38869	0.3067	Yes
row_27	FAW_012645	FAW_012645	APKC	NULL	1176	1.36112	0.3141	Yes
row_28	FAW_011367	FAW_011367	RAB35	NULL	1239	1.34359	0.3221	Yes
row_29	FAW_014324	FAW_014324	--	NULL	1301	1.32403	0.33	Yes
row_30	MSTRG.6084	MSTRG.6084	PARD6G	NULL	1308	1.32173	0.3401	Yes
row_31	FAW_012650	FAW_012650	APKC	NULL	1334	1.31673	0.3495	Yes
row_32	FAW_012924	FAW_012924	VPS60	NULL	1350	1.31028	0.3592	Yes
row_33	FAW_012791	FAW_012791	CENG1A	NULL	1359	1.30883	0.3692	Yes
row_34	FAW_012767	FAW_012767	HSC70-4	NULL	1423	1.29148	0.3767	Yes
row_35	FAW_011652	FAW_011652	VPS37A	NULL	1511	1.26622	0.383	Yes
row_36	FAW_019685	FAW_019685	WASHC4	NULL	1562	1.25533	0.3908	Yes
row_37	FAW_001872	FAW_001872	RAB7	NULL	1606	1.246	0.3988	Yes
row_38	FAW_001144	FAW_001144	TSG101	NULL	1627	1.24261	0.4078	Yes
row_39	FAW_014834	FAW_014834	VPS28	NULL	1653	1.23702	0.4165	Yes
row_40	FAW_017556	FAW_017556	WASHC1	NULL	1661	1.23599	0.426	Yes
row_41	FAW_014647	FAW_014647	ENDOA	NULL	1688	1.23262	0.4346	Yes
row_42	FAW_001070	FAW_001070	SNX1	NULL	1689	1.23236	0.4443	Yes
row_43	FAW_018497	FAW_018497	CPA	NULL	1735	1.22452	0.4521	Yes
row_44	FAW_015283	FAW_015283	EHD3	NULL	1806	1.21032	0.4587	Yes
row_45	FAW_004108	FAW_004108	STAM2	NULL	1923	1.18882	0.4632	Yes
row_46	FAW_002693	FAW_002693	ARAP3	NULL	1935	1.18674	0.4721	Yes
row_47	FAW_007249	FAW_007249	HRS	NULL	1967	1.17813	0.4801	Yes
row_48	FAW_007257	FAW_007257	CYTH1	NULL	1968	1.17804	0.4894	Yes
row_49	FAW_014514	FAW_014514	GIT2	NULL	2072	1.15546	0.4941	Yes
row_50	FAW_007749	FAW_007749	ARPC3	NULL	2239	1.12788	0.496	Yes
row_51	FAW_003650	FAW_003650	SU(DX)	NULL	2256	1.12474	0.5042	Yes
row_52	FAW_000943	FAW_000943	SPG21	NULL	2302	1.11749	0.5111	Yes
row_53	FAW_017682	FAW_017682	EPN2	NULL	2408	1.09912	0.5153	Yes
row_54	FAW_005338	FAW_005338	RAB11FIP4A	NULL	2485	1.08478	0.5207	Yes
row_55	FAW_002775	FAW_002775	EGFR	NULL	2544	1.07592	0.5267	Yes
row_56	FAW_018874	FAW_018874	ACAP2	NULL	2548	1.0754	0.5351	Yes
row_57	FAW_009859	FAW_009859	CHMP3	NULL	2572	1.06973	0.5426	Yes
row_58	FAW_020271	FAW_020271	--	NULL	2683	1.04919	0.5462	Yes
row_59	FAW_012901	FAW_012901	PSD3	NULL	2720	1.04404	0.5529	Yes
row_60	FAW_016122	FAW_016122	PDCD6IP	NULL	2770	1.03737	0.559	Yes
row_61	FAW_005248	FAW_005248	WASHC5	NULL	2906	1.01904	0.5613	Yes
row_62	FAW_003215	FAW_003215	CDC42	NULL	2911	1.01826	0.5692	Yes
row_63	FAW_000252	FAW_000252	VPS36	NULL	2978	1.00561	0.5743	Yes
row_64	FAW_011364	FAW_011364	CHC	NULL	3013	0.999958	0.5808	Yes
row_65	FAW_011366	FAW_011366	ARPC4	NULL	3101	0.984754	0.5849	Yes
row_66	FAW_016808	FAW_016808	RAB10	NULL	3198	0.970344	0.5885	Yes
row_67	FAW_019016	FAW_019016	--	NULL	3201	0.970104	0.5961	Yes
row_68	FAW_021118	FAW_021118	VPS26	NULL	3308	0.954974	0.5991	Yes
row_69	FAW_020899	FAW_020899	EPS15L1	NULL	3320	0.953416	0.6062	Yes
row_70	FAW_011048	FAW_011048	ALPHA-ADAPTIN	NULL	3429	0.938877	0.609	Yes
row_71	FAW_019359	FAW_019359	VPS37B	NULL	3434	0.938683	0.6162	Yes
row_72	FAW_006355	FAW_006355	CHMP1B	NULL	3543	0.924269	0.619	Yes
row_73	FAW_019330	FAW_019330	RAB5B	NULL	3581	0.917601	0.6246	Yes
row_74	FAW_006829	FAW_006829	VTA1	NULL	3602	0.914074	0.631	Yes
row_75	FAW_002132	FAW_002132	--	NULL	3834	0.885061	0.6282	Yes
row_76	FAW_020897	FAW_020897	--	NULL	3872	0.879314	0.6336	Yes
row_77	FAW_011914	FAW_011914	AP2S1	NULL	4032	0.855348	0.6336	Yes
row_78	FAW_005007	FAW_005007	SRC64B	NULL	4240	0.827264	0.6314	Yes
row_79	FAW_012651	FAW_012651	CAPZB	NULL	4392	0.808966	0.6313	Yes
row_80	FAW_016831	FAW_016831	ARPC1A	NULL	4405	0.806843	0.6372	Yes
row_81	FAW_006846	FAW_006846	RNF41	NULL	4564	0.788171	0.6367	Yes
row_82	FAW_003669	FAW_003669	ARPC5	NULL	4582	0.786222	0.6422	Yes
row_83	FAW_007638	FAW_007638	VPS29	NULL	4754	0.764394	0.641	Yes
row_84	FAW_017126	FAW_017126	AMPH	NULL	4780	0.759714	0.6459	Yes
row_85	FAW_002616	FAW_002616	ARFGAP1	NULL	4874	0.743444	0.6479	Yes
row_86	FAW_020578	FAW_020578	AP2M1	NULL	5037	0.721753	0.6467	Yes
row_87	FAW_020758	FAW_020758	CHMP2A	NULL	5052	0.720136	0.6518	Yes
row_88	FAW_012766	FAW_012766	TMEM161B	NULL	5226	0.695273	0.6499	Yes
row_89	FAW_016699	FAW_016699	--	NULL	5250	0.693142	0.6544	Yes
row_90	FAW_012680	FAW_012680	LDLRAP1	NULL	5383	0.676221	0.6542	Yes
row_91	FAW_011505	FAW_011505	VPS45	NULL	5403	0.673769	0.6587	Yes
row_92	FAW_021229	FAW_021229	RAB11A	NULL	5570	0.653017	0.6568	Yes
row_93	FAW_011208	FAW_011208	RBSN	NULL	5915	0.608813	0.647	Yes
row_94	FAW_021332	FAW_021332	SMAD3	NULL	6172	0.576303	0.6407	Yes
row_95	FAW_007954	FAW_007954	SNF8	NULL	6225	0.570204	0.643	Yes
row_96	FAW_009773	FAW_009773	GPRK2	NULL	6360	0.550646	0.6417	Yes
row_97	FAW_008367	FAW_008367	WASHC3	NULL	6466	0.537411	0.6415	Yes
row_98	FAW_012081	FAW_012081	RAB8A	NULL	6475	0.535533	0.6454	Yes
row_99	FAW_009600	FAW_009600	SNX12	NULL	6690	0.505946	0.6403	Yes
row_100	FAW_020754	FAW_020754	ARFGAP3	NULL	6970	0.472525	0.6322	Yes
row_101	FAW_007258	FAW_007258	--	NULL	7018	0.465493	0.6339	Yes
row_102	FAW_021810	FAW_021810	SMAD3	NULL	7088	0.456264	0.6345	Yes
row_103	FAW_005657	FAW_005657	ARPC2	NULL	7136	0.450712	0.6361	Yes
row_104	FAW_004141	FAW_004141	VPS25	NULL	7138	0.450297	0.6396	Yes
row_105	FAW_007307	FAW_007307	CHMP6	NULL	7768	0.371683	0.6159	Yes
row_106	FAW_007546	FAW_007546	--	NULL	7883	0.356966	0.6139	Yes
row_107	FAW_023039	FAW_023039	FGFR3	NULL	8057	0.339062	0.6092	Yes
row_108	FAW_000766	FAW_000766	RHO1	NULL	8353	0.308811	0.5991	Yes
row_109	FAW_000804	FAW_000804	DAB	NULL	8509	0.29016	0.5949	Yes
row_110	FAW_011059	FAW_011059	ARF1	NULL	8753	0.264715	0.5866	Yes
row_111	FAW_012601	FAW_012601	GBF1	NULL	8797	0.2598	0.5869	Yes
row_112	FAW_012647	FAW_012647	--	NULL	8815	0.258071	0.5882	Yes
row_113	FAW_004785	FAW_004785	ARF6	NULL	9072	0.229067	0.5791	Yes
row_114	FAW_013051	FAW_013051	HSP68	NULL	9688	0.161658	0.5543	Yes
row_115	FAW_000594	FAW_000594	PLD1	NULL	9847	0.143035	0.5488	Yes
row_116	FAW_004150	FAW_004150	CAV2	NULL	12271	0	0.446	No
row_117	FAW_007615	FAW_007615	HSP70AB	NULL	13272	0	0.4036	No
row_118	FAW_012783	FAW_012783	CENG1A	NULL	14848	0	0.3368	No
row_119	FAW_017889	FAW_017889	--	NULL	17206	0	0.2368	No
row_120	FAW_014749	FAW_014749	VPS35	NULL	19837	-0.0713052	0.1258	No
row_121	FAW_004375	FAW_004375	ASAP	NULL	20392	-0.145521	0.1035	No
row_122	FAW_000571	FAW_000571	TRAF7	NULL	21003	-0.233094	0.0795	No
row_123	FAW_021033	FAW_021033	--	NULL	22393	-0.626176	0.0255	No
row_124	FAW_006394	FAW_006394	HSP68	NULL	23047	-1.04593	0.0061	No
row_125	FAW_017953	FAW_017953	HSP70BA	NULL	23049	-1.04693	0.0143	No
row_126	FAW_017951	FAW_017951	HSP70BA	NULL	23481	-1.7036	0.0095	No

## Sheet: Table S8
Table S8 The detail information of enriched KEGG pathways in group c and g
Pathway
Apoptosis	FAW_011283
	FAW_008839
	FAW_005581
	FAW_001210
Endocytosis	FAW_020947
	FAW_014514
	FAW_011769
	FAW_007545
MAPK signaling pathway	FAW_014645
	FAW_007148
	FAW_005581
	FAW_001210
Insect hormone biosynthesis	FAW_016029
	FAW_016028
	FAW_012997
	FAW_012996
	FAW_008594
	FAW_000767
